# Supplementary material for: ORC interacts with THSC/TREX-2 and its subunits promote Nxf1 association with mRNP and mRNA export in Drosophila
Source: PubMed Central journal article supplement — Nucleic Acids Res. 2016 Mar 25;44(10):4920–33. doi: 10.1093/nar/gkw192 (PMC4889942; doi:10.1093/nar/gkw192), 2016-03-25
Supplement: supp_gkw192_nar-03740-v-2015-File008.pdf [file supp_gkw192_nar-03740-v-2015-File008.pdf]

# Mascot Search Results

**User** : Ilya  
**Email** : toropygin@rambler.ru  
**Search title** : Submitted from Shidlovsky 080328 II by Mascot Daemon on P4P800SE  
**MS data file** : \\192.168.0.18\data on ultraflex-2\DATA\2008\_Ilya\Shidlovsky\080328\001\0\_J7\1\001\_0\_J7\_\_1.dar  
**Database** : NCBIInr 20070307 (4984280 sequences; 1723577896 residues)  
**Taxonomy** : Drosophila (fruit flies) (47828 sequences)  
**Timestamp** : 2 Apr 2008 at 19:34:01 GMT  
**Top Score** : 128 for [gi|17137482](#), Origin recognition complex subunit 6 CG1584-PA [Drosophila melanogaster]

## Probability Based Mowse Score

Protein score is  $-10 \cdot \log(P)$ , where P is the probability that the observed match is a random event. Protein scores greater than 59 are significant ( $p < 0.05$ ).

Score Distribution

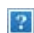

## Protein Summary Report

|                           |                      |
|---------------------------|----------------------|
| Protein Summary           | <a href="#">Help</a> |
| Significance threshold p< | Max. number of hits  |

## Overview Table

Click on column header to jump to entry in results list.  
 Move mouse over any indicator to highlight identical peptides.  
 Click on an indicator to see details of individual match.  
 Use check boxes to select sub-set of queries for new search.

Mouse over:

| Hit:                         | 1 | 2 | 3 | 4 | 5 | 6 | 7 | 8 | 9 | 10 | 11 | 12 | 13 | 14 | 15 | 16 | 17 | 18 | 19 | 20 |
|------------------------------|---|---|---|---|---|---|---|---|---|----|----|----|----|----|----|----|----|----|----|----|
| <a href="#">1201.67</a> (1+) |   |   |   | ? | ? |   | ? | ? |   |    |    |    | ?  |    |    |    |    |    |    |    |
| <a href="#">1209.61</a> (1+) | ? | ? | ? |   |   | ? | ? | ? |   | ?  | ?  | ?  |    | ?  | ?  |    | ?  | ?  | ?  |    |
| <a href="#">1225.61</a> (1+) | ? | ? | ? | ? |   |   | ? | ? |   |    |    |    |    | ?  | ?  |    | ?  | ?  | ?  |    |
| <a href="#">1414.71</a> (1+) | ? | ? |   | ? | ? | ? |   | ? |   | ?  | ?  |    |    |    | ?  |    |    |    |    |    |
| <a href="#">1430.71</a> (1+) | ? | ? |   |   |   | ? |   | ? |   |    |    | ?  |    |    | ?  |    |    |    |    |    |
| <a href="#">1462.72</a> (1+) | ? | ? |   |   |   |   | ? | ? | ? | ?  |    |    |    |    | ?  | ?  |    |    |    |    |
| <a href="#">1609.80</a> (1+) | ? | ? | ? |   | ? | ? | ? | ? |   | ?  | ?  | ?  | ?  |    |    | ?  |    |    |    | ?  |
| <a href="#">1737.89</a> (1+) | ? | ? | ? | ? | ? |   | ? | ? | ? |    |    | ?  | ?  | ?  |    |    | ?  | ?  | ?  |    |
| <a href="#">2045.01</a> (1+) | ? | ? | ? |   |   |   |   | ? | ? | ?  |    |    |    |    |    | ?  | ?  | ?  | ?  | ?  |
| <a href="#">2663.37</a> (1+) | ? | ? |   |   |   |   |   |   |   |    |    |    |    |    |    |    | ?  | ?  | ?  |    |
| <a href="#">2878.52</a> (1+) | ? | ? |   |   |   |   | ? |   |   |    |    |    | ?  |    |    |    | ?  | ?  | ?  |    |

## Index

| Accession                        | Mass   | Score | Description                                                                          |
|----------------------------------|--------|-------|--------------------------------------------------------------------------------------|
| 1. <a href="#">gi 17137482</a>   | 29220  | 128   | Origin recognition complex subunit 6 CG1584-PA [Drosophila melanogaster]             |
| 2. <a href="#">gi 5081630</a>    | 29220  | 128   | origin recognition complex subunit 6 [Drosophila melanogaster]                       |
| 3. <a href="#">gi 125808343</a>  | 74578  | 47    | GA11692-PA [Drosophila pseudoobscura]                                                |
| 4. <a href="#">gi 125981065</a>  | 35464  | 45    | GA16538-PA [Drosophila pseudoobscura]                                                |
| 5. <a href="#">gi 19920542</a>   | 43668  | 42    | Glutamate oxaloacetate transaminase 2 CG4233-PC, isoform C [Drosophila melanogaster] |
| 6. <a href="#">gi 41617892</a>   | 16447  | 41    | TPA: TPA_inf: HDC09438 [Drosophila melanogaster]                                     |
| 7. <a href="#">gi 24580972</a>   | 48142  | 40    | Glutamate oxaloacetate transaminase 2 CG4233-PB, isoform B [Drosophila melanogaster] |
| 8. <a href="#">gi 24648595</a>   | 514686 | 39    | Dynein heavy chain at 93AB CG3723-PA [Drosophila melanogaster]                       |
| 9. <a href="#">gi 24652928</a>   | 12308  | 38    | CG13171-PA [Drosophila melanogaster]                                                 |
| 10. <a href="#">gi 116007482</a> | 123873 | 36    | CG17665-PA, isoform A [Drosophila melanogaster]                                      |
| 11. <a href="#">gi 25012218</a>  | 124807 | 36    | LD02622p [Drosophila melanogaster]                                                   |
| 12. <a href="#">gi 62862334</a>  | 66917  | 35    | CG17443-PB.3 [Drosophila melanogaster]                                               |
| 13. <a href="#">gi 17933682</a>  | 76201  | 35    | small bristles CG1664-PA [Drosophila melanogaster]                                   |
| 14. <a href="#">gi 37911738</a>  | 27160  | 34    | ACP29AB [Drosophila melanogaster]                                                    |
| 15. <a href="#">gi 24645951</a>  | 59125  | 34    | CG17230-PA, isoform A [Drosophila melanogaster]                                      |
| 16. <a href="#">gi 24585597</a>  | 21761  | 34    | CG31627-PA [Drosophila melanogaster]                                                 |
| 17. <a href="#">gi 17737417</a>  | 250151 | 33    | crinkled CG7595-PB, isoform B [Drosophila melanogaster]                              |
| 18. <a href="#">gi 40882425</a>  | 250169 | 33    | SD18415p [Drosophila melanogaster]                                                   |
| 19. <a href="#">gi 125987181</a> | 249992 | 33    | GA20466-PA [Drosophila pseudoobscura]                                                |
| 20. <a href="#">gi 84912</a>     | 3236   | 33    | Cc gene smaller hypothetical protein - fruit fly (Drosophila melanogaster)           |

## Results List

1. [gi|17137482](#) Mass: 29220 Score: **128** Expect: 7.6e-009 Queries matched: 10  
Origin recognition complex subunit 6 CG1584-PA [Drosophila melanogaster]
- | Observed | Mr(expt) | Mr(calc) | ppm    | Start | End   | Miss | Peptide                                    |
|----------|----------|----------|--------|-------|-------|------|--------------------------------------------|
| 1209.61  | 1208.60  | 1208.65  | -36.80 | 113   | - 122 | 1    | R.KAEELMTLFLK.G                            |
| 1225.61  | 1224.61  | 1224.64  | -29.39 | 113   | - 122 | 1    | R.KAEELMTLFLK.G + Oxidation (M)            |
| 1414.71  | 1413.71  | 1413.73  | -16.65 | 12    | - 23  | 1    | K.MGLREEPNVLEK.T                           |
| 1430.71  | 1429.70  | 1429.72  | -17.82 | 12    | - 23  | 1    | K.MGLREEPNVLEK.T + Oxidation (M)           |
| 1462.72  | 1461.72  | 1461.75  | -20.52 | 35    | - 47  | 0    | R.STNVPLQINEYGK.I                          |
| 1609.80  | 1608.79  | 1608.79  | -1.20  | 217   | - 229 | 0    | K.AHKPPPEDYEIWK.A                          |
| 1737.89  | 1736.88  | 1736.89  | -2.97  | 216   | - 229 | 1    | K.KAHKPPPEDYEIWK.A                         |
| 2045.01  | 2044.00  | 2043.98  | 11.1   | 240   | - 257 | 1    | K.LKELEASQSHMDSQLLEA.- + Oxidation (M)     |
| 2663.37  | 2662.37  | 2662.33  | 12.5   | 160   | - 180 | 0    | K.LMPFSNLRPSQFQLLEQQWER.M + Oxidation (M)  |
| 2878.52  | 2877.51  | 2877.46  | 18.3   | 158   | - 180 | 1    | K.SKLMPSNLRPSQFQLLEQQWER.M + Oxidation (M) |
- No match to: 1201.67
2. [gi|5081630](#) Mass: 29220 Score: **128** Expect: 7.6e-009 Queries matched: 10  
origin recognition complex subunit 6 [Drosophila melanogaster]
- | Observed | Mr(expt) | Mr(calc) | ppm    | Start | End   | Miss | Peptide                                    |
|----------|----------|----------|--------|-------|-------|------|--------------------------------------------|
| 1209.61  | 1208.60  | 1208.65  | -36.80 | 113   | - 122 | 1    | R.KAEELMTLFLK.G                            |
| 1225.61  | 1224.61  | 1224.64  | -29.39 | 113   | - 122 | 1    | R.KAEELMTLFLK.G + Oxidation (M)            |
| 1414.71  | 1413.71  | 1413.73  | -16.65 | 12    | - 23  | 1    | K.MGLREEPNVLEK.T                           |
| 1430.71  | 1429.70  | 1429.72  | -17.82 | 12    | - 23  | 1    | K.MGLREEPNVLEK.T + Oxidation (M)           |
| 1462.72  | 1461.72  | 1461.75  | -20.52 | 35    | - 47  | 0    | R.STNVPLQINEYGK.I                          |
| 1609.80  | 1608.79  | 1608.79  | -1.20  | 217   | - 229 | 0    | K.AHKPPPEDYEIWK.A                          |
| 1737.89  | 1736.88  | 1736.89  | -2.97  | 216   | - 229 | 1    | K.KAHKPPPEDYEIWK.A                         |
| 2045.01  | 2044.00  | 2043.98  | 11.1   | 240   | - 257 | 1    | K.LKELEASQSHMDSQLLEA.- + Oxidation (M)     |
| 2663.37  | 2662.37  | 2662.33  | 12.5   | 160   | - 180 | 0    | K.LMPFSNLRPSQFQLLEQQWER.M + Oxidation (M)  |
| 2878.52  | 2877.51  | 2877.46  | 18.3   | 158   | - 180 | 1    | K.SKLMPSNLRPSQFQLLEQQWER.M + Oxidation (M) |
- No match to: 1201.67
3. [gi|125808343](#) Mass: 74578 Score: 47 Expect: 1.1 Queries matched: 5  
GA11692-PA [Drosophila pseudoobscura]
- | Observed | Mr(expt) | Mr(calc) | ppm    | Start | End   | Miss | Peptide                                    |
|----------|----------|----------|--------|-------|-------|------|--------------------------------------------|
| 1209.61  | 1208.60  | 1208.59  | 13.4   | 1     | - 11  | 1    | -.MGCMKWVGAVK.R                            |
| 1225.61  | 1224.61  | 1224.61  | -6.10  | 287   | - 297 | 0    | R.ALTAPYPSYSR.A                            |
| 1609.80  | 1608.79  | 1608.80  | -6.25  | 34    | - 48  | 0    | K.HGQCAFVPGICKPPR.V                        |
| 1737.89  | 1736.88  | 1736.90  | -7.64  | 33    | - 48  | 1    | K.KHGQCAFVPGICKPPR.V                       |
| 2045.01  | 2044.00  | 2044.06  | -28.79 | 153   | - 169 | 1    | R.NLCQFVLAIVPSPCDRK.F + 2 Propionamide (C) |
- No match to: 1201.67, 1414.71, 1430.71, 1462.72, 2663.37, 2878.52
4. [gi|125981065](#) Mass: 35464 Score: 45 Expect: 1.4 Queries matched: 4  
GA16538-PA [Drosophila pseudoobscura]

| Observed | Mr(expt) | Mr(calc) | ppm    | Start     | End | Miss | Peptide                            |
|----------|----------|----------|--------|-----------|-----|------|------------------------------------|
| 1201.67  | 1200.66  | 1200.65  | 9.11   | 291 - 301 | 1   |      | K.ISAKCGDVIPK.L + Propionamide (C) |
| 1225.61  | 1224.61  | 1224.59  | 11.1   | 100 - 110 | 0   |      | R.NFVGWPSFSGK.Q                    |
| 1414.71  | 1413.71  | 1413.76  | -40.03 | 147 - 159 | 0   |      | K.NVVELHGSGYVIK.C                  |
| 1737.89  | 1736.88  | 1736.95  | -40.26 | 128 - 142 | 1   |      | R.IQSVVTQNVDRLHTK.A                |

**No match to:** 1209.61, 1430.71, 1462.72, 1609.80, 2045.01, 2663.37, 2878.52

5. [gi|19920542](#) Mass: 43668 Score: 42 Expect: 3 Queries matched: 4  
Glutamate oxaloacetate transaminase 2 CG4233-PC, isoform C [Drosophila melanogaster]

| Observed | Mr(expt) | Mr(calc) | ppm    | Start     | End | Miss | Peptide              |
|----------|----------|----------|--------|-----------|-----|------|----------------------|
| 1201.67  | 1200.66  | 1200.66  | -0.24  | 309 - 318 | 1   |      | K.LMADRIIDVR.T       |
| 1414.71  | 1413.71  | 1413.75  | -32.09 | 2 - 15    | 0   |      | M.GPPDAILGVTEAFK.K   |
| 1609.80  | 1608.79  | 1608.77  | 13.1   | 148 - 162 | 0   |      | K.DTCALDFGGLIEDLK.K  |
| 1737.89  | 1736.88  | 1736.87  | 10.3   | 148 - 163 | 1   |      | K.DTCALDFGGLIEDLKK.I |

**No match to:** 1209.61, 1225.61, 1430.71, 1462.72, 2045.01, 2663.37, 2878.52

6. [gi|41617892](#) Mass: 16447 Score: 41 Expect: 4.1 Queries matched: 4  
TPA: TPA\_inf: HDC09438 [Drosophila melanogaster]

| Observed | Mr(expt) | Mr(calc) | ppm    | Start   | End | Miss | Peptide                         |
|----------|----------|----------|--------|---------|-----|------|---------------------------------|
| 1209.61  | 1208.60  | 1208.68  | -61.93 | 13 - 22 | 1   |      | K.VHQKVVTVGWR.N                 |
| 1414.71  | 1413.71  | 1413.66  | 33.7   | 1 - 12  | 0   |      | -.MYFIYGPVCGK.V                 |
| 1430.71  | 1429.70  | 1429.65  | 32.0   | 1 - 12  | 0   |      | -.MYFIYGPVCGK.V + Oxidation (M) |
| 1609.80  | 1608.79  | 1608.79  | 1.29   | 23 - 36 | 0   |      | R.NLDAVLSTWSNYAR.N              |

**No match to:** 1201.67, 1225.61, 1462.72, 1737.89, 2045.01, 2663.37, 2878.52

7. [gi|24580972](#) Mass: 48142 Score: 40 Expect: 4.5 Queries matched: 5  
Glutamate oxaloacetate transaminase 2 CG4233-PB, isoform B [Drosophila melanogaster]

| Observed | Mr(expt) | Mr(calc) | ppm    | Start     | End | Miss | Peptide                          |
|----------|----------|----------|--------|-----------|-----|------|----------------------------------|
| 1201.67  | 1200.66  | 1200.66  | -0.24  | 347 - 356 | 1   |      | K.LMADRIIDVR.T                   |
| 1209.61  | 1208.60  | 1208.66  | -48.89 | 1 - 10    | 1   |      | -.MSRTIIMTLK.D + Oxidation (M)   |
| 1225.61  | 1224.61  | 1224.66  | -41.33 | 1 - 10    | 1   |      | -.MSRTIIMTLK.D + 2 Oxidation (M) |
| 1609.80  | 1608.79  | 1608.77  | 13.1   | 186 - 200 | 0   |      | K.DTCALDFGGLIEDLK.K              |
| 1737.89  | 1736.88  | 1736.87  | 10.3   | 186 - 201 | 1   |      | K.DTCALDFGGLIEDLKK.I             |

**No match to:** 1414.71, 1430.71, 1462.72, 2045.01, 2663.37, 2878.52

8. [gi|24648595](#) Mass: 514686 Score: 39 Expect: 6.3 Queries matched: 9  
Dynein heavy chain at 93AB CG3723-PA [Drosophila melanogaster]

| Observed | Mr(expt) | Mr(calc) | ppm    | Start       | End | Miss | Peptide                                           |
|----------|----------|----------|--------|-------------|-----|------|---------------------------------------------------|
| 1201.67  | 1200.66  | 1200.67  | -5.68  | 1138 - 1148 | 1   |      | R.KADEGLLQTVK.E                                   |
| 1209.61  | 1208.60  | 1208.53  | 58.9   | 709 - 717   | 0   |      | R.EVHYMQMK.I + Oxidation (M)                      |
| 1225.61  | 1224.61  | 1224.53  | 65.1   | 709 - 717   | 0   |      | R.EVHYMQMK.I + 2 Oxidation (M)                    |
| 1414.71  | 1413.71  | 1413.77  | -45.72 | 3860 - 3870 | 1   |      | R.LCMIRALRPDR.M + Propionamide (C)                |
| 1430.71  | 1429.70  | 1429.68  | 12.7   | 3871 - 3882 | 0   |      | R.MTYALADFIEEK.L                                  |
| 1462.72  | 1461.72  | 1461.65  | 46.3   | 3284 - 3294 | 0   |      | K.FYEVYCDVEPK.R + Propionamide (C)                |
| 1609.80  | 1608.79  | 1608.75  | 24.2   | 4241 - 4253 | 0   |      | K.LPEEFNMVEIMNK.V + Oxidation (M)                 |
| 1737.89  | 1736.88  | 1736.87  | 9.56   | 4201 - 4214 | 1   |      | R.AENIFRTVFEMQPR.D                                |
| 2878.52  | 2877.51  | 2877.60  | -29.53 | 2657 - 2682 | 1   |      | R.MTPNIVAATIALHNKCLQVFLPTAIK.S + Propionamide (C) |

**No match to:** 2045.01, 2663.37

9. [gi|24652928](#) Mass: 12308 Score: 38 Expect: 7.2 Queries matched: 3  
CG13171-PA [Drosophila melanogaster]

| Observed | Mr(expt) | Mr(calc) | ppm    | Start   | End | Miss | Peptide                                              |
|----------|----------|----------|--------|---------|-----|------|------------------------------------------------------|
| 1462.72  | 1461.72  | 1461.73  | -10.67 | 63 - 74 | 0   |      | R.MELGLLCLQSER.N + Propionamide (C)                  |
| 1737.89  | 1736.88  | 1736.84  | 26.6   | 61 - 74 | 1   |      | K.CRMELGLLCLQSER.N + Oxidation (M); Propionamide (C) |
| 2045.01  | 2044.00  | 2044.08  | -39.11 | 63 - 79 | 1   |      | R.MELGLLCLQSERNVQLK.G + Propionamide (C)             |

**No match to:** 1201.67, 1209.61, 1225.61, 1414.71, 1430.71, 1609.80, 2663.37, 2878.52

10. [gi|116007482](#) Mass: 123873 Score: 36 Expect: 12 Queries matched: 5  
CG17665-PA, isoform A [Drosophila melanogaster]

| Observed | Mr(expt) | Mr(calc) | ppm    | Start     | End | Miss | Peptide                             |
|----------|----------|----------|--------|-----------|-----|------|-------------------------------------|
| 1209.61  | 1208.60  | 1208.65  | -40.01 | 85 - 94   | 1   |      | K.TYRDVTLVSR.D                      |
| 1414.71  | 1413.71  | 1413.70  | 0.67   | 597 - 607 | 1   |      | K.RNSYTWEAFK.D                      |
| 1462.72  | 1461.72  | 1461.64  | 51.3   | 49 - 60   | 0   |      | K.EMHDMLSQAVCK.E + Propionamide (C) |
| 1609.80  | 1608.79  | 1608.89  | -59.58 | 444 - 457 | 0   |      | K.QVIPNLQPLFESPK.L                  |
| 2045.01  | 2044.00  | 2044.08  | -37.79 | 241 - 256 | 1   |      | R.IPEFEQLWRDILFNPK.M                |

**No match to:** 1201.67, 1225.61, 1430.71, 1737.89, 2663.37, 2878.52

11. [gi|25012218](#) Mass: 124807 Score: 36 Expect: 13 Queries matched: 5  
LD02622p [Drosophila melanogaster]
- | Observed | Mr(expt) | Mr(calc) | ppm    | Start | End   | Miss | Peptide                             |
|----------|----------|----------|--------|-------|-------|------|-------------------------------------|
| 1209.61  | 1208.60  | 1208.65  | -40.01 | 85    | - 94  | 1    | K.TYRDVTLVSR.D                      |
| 1414.71  | 1413.71  | 1413.70  | 0.67   | 597   | - 607 | 1    | K.RNSYTWEAFLK.D                     |
| 1462.72  | 1461.72  | 1461.64  | 51.3   | 49    | - 60  | 0    | K.EMHDMLSQAVCK.E + Propionamide (C) |
| 1609.80  | 1608.79  | 1608.89  | -59.58 | 444   | - 457 | 0    | K.QVIPNLQPLFESPK.L                  |
| 2045.01  | 2044.00  | 2044.08  | -37.79 | 241   | - 256 | 1    | R.IPEFEQLWRDILFNPK.M                |
- No match to: 1201.67, 1225.61, 1430.71, 1737.89, 2663.37, 2878.52
12. [gi|62862334](#) Mass: 66917 Score: 35 Expect: 14 Queries matched: 4  
CG17443-PB.3 [Drosophila melanogaster]
- | Observed | Mr(expt) | Mr(calc) | ppm    | Start | End   | Miss | Peptide             |
|----------|----------|----------|--------|-------|-------|------|---------------------|
| 1209.61  | 1208.60  | 1208.63  | -21.37 | 394   | - 403 | 1    | R.IKEALEYESK.N      |
| 1430.71  | 1429.70  | 1429.77  | -48.77 | 351   | - 362 | 1    | R.AIDEIHHDKKPK.S    |
| 1609.80  | 1608.79  | 1608.85  | -36.95 | 254   | - 267 | 0    | K.LQFYINIASENIGK.M  |
| 1737.89  | 1736.88  | 1736.95  | -36.08 | 253   | - 267 | 1    | K.KLQFYINIASENIGK.M |
- No match to: 1201.67, 1225.61, 1414.71, 1462.72, 2045.01, 2663.37, 2878.52
13. [gi|17933682](#) Mass: 76201 Score: 35 Expect: 17 Queries matched: 4  
small bristles CG1664-PA [Drosophila melanogaster]
- | Observed | Mr(expt) | Mr(calc) | ppm    | Start | End   | Miss | Peptide                                     |
|----------|----------|----------|--------|-------|-------|------|---------------------------------------------|
| 1201.67  | 1200.66  | 1200.62  | 36.2   | 431   | - 440 | 1    | R.LLNGEENRTR.N                              |
| 1609.80  | 1608.79  | 1608.81  | -10.31 | 510   | - 523 | 0    | R.TYVVVPQNGFCIR.N                           |
| 1737.89  | 1736.88  | 1736.86  | 16.0   | 444   | - 458 | 1    | K.YGRLACVSTLDEWPK.T                         |
| 2878.52  | 2877.51  | 2877.42  | 33.5   | 103   | - 126 | 1    | K.FGKLMPSFGWYQVTLQNAQIYEK.E + Oxidation (M) |
- No match to: 1209.61, 1225.61, 1414.71, 1430.71, 1462.72, 2045.01, 2663.37
14. [gi|37911738](#) Mass: 27160 Score: 34 Expect: 20 Queries matched: 3  
ACP29AB [Drosophila melanogaster]
- | Observed | Mr(expt) | Mr(calc) | ppm    | Start | End   | Miss | Peptide                             |
|----------|----------|----------|--------|-------|-------|------|-------------------------------------|
| 1209.61  | 1208.60  | 1208.64  | -31.81 | 117   | - 126 | 1    | K.VGSRHFHIEK.N                      |
| 1225.61  | 1224.61  | 1224.52  | 67.8   | 225   | - 234 | 0    | K.SFVCQADQWA.- + Propionamide (C)   |
| 1737.89  | 1736.88  | 1736.84  | 26.4   | 98    | - 112 | 1    | R.HHASNIEASNNIKMR.R + Oxidation (M) |
- No match to: 1201.67, 1414.71, 1430.71, 1462.72, 1609.80, 2045.01, 2663.37, 2878.52
15. [gi|24645951](#) Mass: 59125 Score: 34 Expect: 21 Queries matched: 5  
CG17230-PA, isoform A [Drosophila melanogaster]
- | Observed | Mr(expt) | Mr(calc) | ppm    | Start | End   | Miss | Peptide                                           |
|----------|----------|----------|--------|-------|-------|------|---------------------------------------------------|
| 1209.61  | 1208.60  | 1208.62  | -15.98 | 128   | - 137 | 1    | K.LEMEAKLYGR.W                                    |
| 1225.61  | 1224.61  | 1224.62  | -8.85  | 128   | - 137 | 1    | K.LEMEAKLYGR.W + Oxidation (M)                    |
| 1414.71  | 1413.71  | 1413.72  | -12.05 | 291   | - 301 | 0    | K.QISLCINMLHR.M + Oxidation (M); Propionamide (C) |
| 1430.71  | 1429.70  | 1429.68  | 12.8   | 64    | - 75  | 1    | R.DQOEKEAALNER.R                                  |
| 1462.72  | 1461.72  | 1461.70  | 11.6   | 467   | - 478 | 1    | R.SEVDMQRLNQSR.S                                  |
- No match to: 1201.67, 1609.80, 1737.89, 2045.01, 2663.37, 2878.52
16. [gi|24585597](#) Mass: 21761 Score: 34 Expect: 21 Queries matched: 3  
CG31627-PA [Drosophila melanogaster]
- | Observed | Mr(expt) | Mr(calc) | ppm    | Start | End   | Miss | Peptide              |
|----------|----------|----------|--------|-------|-------|------|----------------------|
| 1462.72  | 1461.72  | 1461.69  | 16.5   | 110   | - 121 | 1    | K.DRIWDIAIDEMK.A     |
| 1609.80  | 1608.79  | 1608.82  | -18.95 | 64    | - 77  | 1    | R.KTPITFSPSPEFMK.T   |
| 2045.01  | 2044.00  | 2043.99  | 6.49   | 161   | - 176 | 0    | K.LFYSDNLLFLNHMFDR.E |
- No match to: 1201.67, 1209.61, 1225.61, 1414.71, 1430.71, 1737.89, 2663.37, 2878.52
17. [gi|17737417](#) Mass: 250151 Score: 33 Expect: 22 Queries matched: 6  
crinkled CG7595-PB, isoform B [Drosophila melanogaster]
- | Observed | Mr(expt) | Mr(calc) | ppm    | Start | End    | Miss | Peptide                                         |
|----------|----------|----------|--------|-------|--------|------|-------------------------------------------------|
| 1209.61  | 1208.60  | 1208.67  | -55.94 | 1457  | - 1465 | 1    | K.YKWPLLFPSR.F                                  |
| 1225.61  | 1224.61  | 1224.59  | 14.4   | 1695  | - 1703 | 1    | R.SEELWRYSR.D                                   |
| 1737.89  | 1736.88  | 1736.88  | -0.40  | 1248  | - 1262 | 0    | K.KPIMLPITFMDGNTK.T + 2 Oxidation (M)           |
| 2045.01  | 2044.00  | 2043.92  | 41.2   | 2032  | - 2050 | 1    | K.RSIVASYNQDGGMTSEDAK.V + Oxidation (M)         |
| 2663.37  | 2662.37  | 2662.24  | 48.5   | 1584  | - 1607 | 0    | K.GDLIILEDESCGESVLNNGWCIGR.C + Propionamide (C) |
| 2878.52  | 2877.51  | 2877.51  | -0.50  | 180   | - 204  | 1    | K.HSWIEQQILEANPILEAFGNAKTIR.N                   |
- No match to: 1201.67, 1414.71, 1430.71, 1462.72, 1609.80
18. [gi|40882425](#) Mass: 250169 Score: 33 Expect: 23 Queries matched: 6  
SD18415p [Drosophila melanogaster]

| Observed | Mr(expt) | Mr(calc) | ppm    | Start | End | Miss | Peptide |                                                  |
|----------|----------|----------|--------|-------|-----|------|---------|--------------------------------------------------|
| 1209.61  | 1208.60  | 1208.67  | -55.94 | 1457  | -   | 1465 | 1       | K.YKWPLLFSR.F                                    |
| 1225.61  | 1224.61  | 1224.59  | 14.4   | 1695  | -   | 1703 | 1       | R.SEELWRYSR.D                                    |
| 1737.89  | 1736.88  | 1736.88  | -0.40  | 1248  | -   | 1262 | 0       | K.KPIMLPITFMDGNTK.T + 2 Oxidation (M)            |
| 2045.01  | 2044.00  | 2043.92  | 41.2   | 2032  | -   | 2050 | 1       | K.RSIVASYNQDGGMTSEDAK.V + Oxidation (M)          |
| 2663.37  | 2662.37  | 2662.24  | 48.5   | 1584  | -   | 1607 | 0       | K.GDLIILEDESCGESVLLNNGWCIGR.C + Propionamide (C) |
| 2878.52  | 2877.51  | 2877.51  | -0.50  | 180   | -   | 204  | 1       | K.HSWIEQQILEANPILEAFGNAKTIR.N                    |

**No match to:** 1201.67, 1414.71, 1430.71, 1462.72, 1609.80

19. [gi|125987181](#) Mass: 249992 Score: 33 Expect: 23 Queries matched: 6

GA20466-PA [Drosophila pseudoobscura]

| Observed | Mr(expt) | Mr(calc) | ppm    | Start | End | Miss | Peptide |                                                  |
|----------|----------|----------|--------|-------|-----|------|---------|--------------------------------------------------|
| 1209.61  | 1208.60  | 1208.67  | -55.94 | 1457  | -   | 1465 | 1       | K.YKWPLLFSR.F                                    |
| 1225.61  | 1224.61  | 1224.59  | 14.4   | 1696  | -   | 1704 | 1       | R.SEELWRYSR.D                                    |
| 1737.89  | 1736.88  | 1736.88  | -0.40  | 1248  | -   | 1262 | 0       | K.KPIMLPITFMDGNTK.T + 2 Oxidation (M)            |
| 2045.01  | 2044.00  | 2043.92  | 41.2   | 2033  | -   | 2051 | 1       | K.RSIVASYNQDGGMTSEDAK.V + Oxidation (M)          |
| 2663.37  | 2662.37  | 2662.24  | 48.5   | 1584  | -   | 1607 | 0       | K.GDLIILEDESCGESVLLNNGWCIGR.C + Propionamide (C) |
| 2878.52  | 2877.51  | 2877.51  | -0.50  | 180   | -   | 204  | 1       | K.HSWIEQQILEANPILEAFGNAKTIR.N                    |

**No match to:** 1201.67, 1414.71, 1430.71, 1462.72, 1609.80

20. [gi|84912](#) Mass: 3236 Score: 33 Expect: 25 Queries matched: 2

Cc gene smaller hypothetical protein - fruit fly (Drosophila melanogaster)

| Observed | Mr(expt) | Mr(calc) | ppm  | Start | End | Miss | Peptide |                                       |
|----------|----------|----------|------|-------|-----|------|---------|---------------------------------------|
| 1609.80  | 1608.79  | 1608.76  | 18.5 | 9     | -   | 21   | 1       | R.IGQMGSEWRFGWR.C                     |
| 2045.01  | 2044.00  | 2043.94  | 29.5 | 1     | -   | 17   | 1       | -.MAAQFFNRIGQMGSEWR.F + Oxidation (M) |

**No match to:** 1201.67, 1209.61, 1225.61, 1414.71, 1430.71, 1462.72, 1737.89, 2663.37, 2878.52

## Search Parameters

Type of search : Peptide Mass Fingerprint  
 Enzyme : Trypsin  
 Variable modifications : Oxidation (M),Propionamide (C)  
 Mass values : Monoisotopic  
 Protein Mass : Unrestricted  
 Peptide Mass Tolerance : ± 70 ppm  
 Peptide Charge State : 1+  
 Max Missed Cleavages : 1  
 Number of queries : 11

Mascot: <http://www.matrixscience.com/>

# Mascot Search Results

**User** : Ilya  
**Email** : toropygin@rambler.ru  
**Search title** : Submitted from Shidlovsky 080324 II by Mascot Daemon on P4P800SE  
**MS data file** : \\192.168.0.18\data on ultraflex-2\DATA\2008\_Ilya\Shidlovsky\080325\002\0\_J12\1\002\_0\_J12\_1.dar  
**Database** : NCBIInr 20070307 (4984280 sequences; 1723577896 residues)  
**Taxonomy** : Drosophila (fruit flies) (47828 sequences)  
**Timestamp** : 3 Apr 2008 at 21:49:52 GMT  
**Top Score** : 123 for [gi|21356877](#), CG7351-PA [*Drosophila melanogaster*]

## Probability Based Mowse Score

Protein score is  $-10 \cdot \log(P)$ , where P is the probability that the observed match is a random event. Protein scores greater than 59 are significant ( $p < 0.05$ ).

Score Distribution

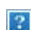

## Protein Summary Report

|                           |                      |
|---------------------------|----------------------|
| Protein Summary           | <a href="#">Help</a> |
| Significance threshold p< | Max. number of hits  |

## Overview Table

Click on column header to jump to entry in results list.  
 Move mouse over any indicator to highlight identical peptides.  
 Click on an indicator to see details of individual match.  
 Use check boxes to select sub-set of queries for new search.

Mouse over:

| Hit:                         | 1 | 2 | 3 | 4 | 5 | 6 | 7 | 8 | 9 | 10 | 11 | 12 | 13 | 14 | 15 | 16 | 17 | 18 | 19 | 20 |
|------------------------------|---|---|---|---|---|---|---|---|---|----|----|----|----|----|----|----|----|----|----|----|
| <a href="#">807.43</a> (1+)  |   |   |   |   |   |   |   |   |   |    |    |    |    |    |    |    |    |    |    |    |
| <a href="#">842.51</a> (1+)  |   |   |   |   |   |   |   |   |   |    |    |    |    |    |    |    |    |    |    |    |
| <a href="#">884.54</a> (1+)  |   |   |   |   |   |   |   |   |   |    |    |    |    |    |    |    |    |    |    |    |
| <a href="#">913.45</a> (1+)  |   |   |   |   |   |   |   |   |   |    |    |    |    |    |    |    |    |    |    |    |
| <a href="#">935.48</a> (1+)  |   |   |   |   |   |   |   |   |   |    |    |    |    |    |    |    |    |    |    |    |
| <a href="#">973.56</a> (1+)  |   |   |   |   |   |   |   |   |   |    |    |    |    |    |    |    |    |    |    |    |
| <a href="#">985.58</a> (1+)  |   |   |   |   |   |   |   |   |   |    |    |    |    |    |    |    |    |    |    |    |
| <a href="#">988.55</a> (1+)  |   |   |   |   |   |   |   |   |   |    |    |    |    |    |    |    |    |    |    |    |
| <a href="#">995.53</a> (1+)  |   |   |   |   |   |   |   |   |   |    |    |    |    |    |    |    |    |    |    |    |
| <a href="#">1009.58</a> (1+) |   |   |   |   |   |   |   |   |   |    |    |    |    |    |    |    |    |    |    |    |
| <a href="#">1021.61</a> (1+) |   |   |   |   |   |   |   |   |   |    |    |    |    |    |    |    |    |    |    |    |
| <a href="#">1033.51</a> (1+) |   |   |   |   |   |   |   |   |   |    |    |    |    |    |    |    |    |    |    |    |
| <a href="#">1036.56</a> (1+) |   |   |   |   |   |   |   |   |   |    |    |    |    |    |    |    |    |    |    |    |
| <a href="#">1037.59</a> (1+) |   |   |   |   |   |   |   |   |   |    |    |    |    |    |    |    |    |    |    |    |
| <a href="#">1098.49</a> (1+) |   |   |   |   |   |   |   |   |   |    |    |    |    |    |    |    |    |    |    |    |



|                              |  |  |  |  |  |  |  |  |  |  |  |  |  |
|------------------------------|--|--|--|--|--|--|--|--|--|--|--|--|--|
| <a href="#">2357.12</a> (1+) |  |  |  |  |  |  |  |  |  |  |  |  |  |
| <a href="#">2510.10</a> (1+) |  |  |  |  |  |  |  |  |  |  |  |  |  |
| <a href="#">2705.09</a> (1+) |  |  |  |  |  |  |  |  |  |  |  |  |  |
| <a href="#">2788.25</a> (1+) |  |  |  |  |  |  |  |  |  |  |  |  |  |

## Index

| Accession                        | Mass   | Score | Description                                                 |
|----------------------------------|--------|-------|-------------------------------------------------------------|
| 1. <a href="#">gi 21356877</a>   | 45150  | 123   | CG7351-PA [Drosophila melanogaster]                         |
| 2. <a href="#">gi 28572018</a>   | 67234  | 60    | CG31033-PC, isoform C [Drosophila melanogaster]             |
| 3. <a href="#">gi 24644700</a>   | 24259  | 48    | CG31488-PA [Drosophila melanogaster]                        |
| 4. <a href="#">gi 24645344</a>   | 49959  | 46    | CG9356-PA, isoform A [Drosophila melanogaster]              |
| 5. <a href="#">gi 46409138</a>   | 41280  | 44    | RE57519p [Drosophila melanogaster]                          |
| 6. <a href="#">gi 125986859</a>  | 24518  | 43    | GA21566-PA [Drosophila pseudoobscura]                       |
| 7. <a href="#">gi 28572022</a>   | 48918  | 43    | CG31033-PB, isoform B [Drosophila melanogaster]             |
| 8. <a href="#">gi 28572020</a>   | 45678  | 43    | CG31033-PA, isoform A [Drosophila melanogaster]             |
| 9. <a href="#">gi 34398667</a>   | 68439  | 42    | heat shock protein 68 [Drosophila simulans]                 |
| 10. <a href="#">gi 34420078</a>  | 69192  | 42    | heat shock protein 68 [Drosophila sechellia]                |
| 11. <a href="#">gi 24645058</a>  | 40088  | 42    | steamer duck CG7954-PC, isoform C [Drosophila melanogaster] |
| 12. <a href="#">gi 13446608</a>  | 135668 | 40    | putative helicase Ski2 [Drosophila melanogaster]            |
| 13. <a href="#">gi 17933658</a>  | 135682 | 40    | twister CG10210-PA [Drosophila melanogaster]                |
| 14. <a href="#">gi 125806738</a> | 23562  | 40    | GA17076-PA [Drosophila pseudoobscura]                       |
| 15. <a href="#">gi 17737847</a>  | 38665  | 38    | steamer duck CG7954-PA, isoform A [Drosophila melanogaster] |
| 16. <a href="#">gi 25012563</a>  | 37492  | 38    | RE37740p [Drosophila melanogaster]                          |
| 17. <a href="#">gi 2612998</a>   | 44349  | 38    | vermilion [Drosophila pallidosa]                            |
| 18. <a href="#">gi 2612996</a>   | 44342  | 38    | vermilion [Drosophila ananassae]                            |
| 19. <a href="#">gi 24640802</a>  | 105649 | 37    | CG32703-PA [Drosophila melanogaster]                        |
| 20. <a href="#">gi 24645056</a>  | 39701  | 37    | steamer duck CG7954-PB, isoform B [Drosophila melanogaster] |

## Results List

1. [gi|21356877](#) Mass: 45150 Score: **123** Expect: 2.4e-008 Queries matched: 22  
CG7351-PA [Drosophila melanogaster]

| Observed | Mr(expt) | Mr(calc) | ppm    | Start | End   | Miss | Peptide                                    |
|----------|----------|----------|--------|-------|-------|------|--------------------------------------------|
| 935.48   | 934.48   | 934.44   | 43.4   | 156   | - 163 | 1    | R.ASEEDTKR.L                               |
| 985.58   | 984.57   | 984.56   | 14.1   | 298   | - 305 | 0    | R.DQELVLIR.S                               |
| 988.55   | 987.54   | 987.50   | 39.6   | 387   | - 395 | 0    | K.QNPFPSVSL.-                              |
| 1021.61  | 1020.60  | 1020.59  | 16.7   | 306   | - 314 | 0    | R.SGIYLLVEK.L                              |
| 1037.59  | 1036.58  | 1036.56  | 15.7   | 258   | - 266 | 0    | K.MLLGYLPSK.S + Oxidation (M)              |
| 1170.86  | 1169.86  | 1169.78  | 65.6   | 248   | - 257 | 0    | R.LILIYLVVVK.M                             |
| 1267.67  | 1266.66  | 1266.68  | -15.07 | 371   | - 381 | 1    | K.IKGYISHAHNK.L                            |
| 1326.93  | 1325.92  | 1325.88  | 31.7   | 247   | - 257 | 1    | K.RLLIYLVVVK.M                             |
| 1389.71  | 1388.70  | 1388.72  | -11.15 | 286   | - 297 | 1    | K.AGNVNRFDEIVR.D                           |
| 1407.80  | 1406.79  | 1406.74  | 35.0   | 164   | - 175 | 0    | R.LGMMNLVNLQFK.I                           |
| 1423.80  | 1422.80  | 1422.74  | 42.0   | 164   | - 175 | 0    | R.LGMMNLVNLQFK.I + Oxidation (M)           |
| 1437.74  | 1436.73  | 1436.72  | 9.11   | 200   | - 211 | 0    | K.DSFPLPEQITYK.Y                           |
| 1439.81  | 1438.80  | 1438.73  | 46.9   | 164   | - 175 | 0    | R.LGMMNLVNLQFK.I + 2 Oxidation (M)         |
| 1523.74  | 1522.73  | 1522.74  | -2.08  | 126   | - 138 | 0    | K.HCQGFTPGHVLEK.A + Propionamide (C)       |
| 1595.86  | 1594.85  | 1594.83  | 11.1   | 163   | - 175 | 1    | K.RLGMMNLVNLQFK.I + 2 Oxidation (M)        |
| 1672.91  | 1671.91  | 1671.86  | 26.6   | 272   | - 285 | 0    | R.YDLLLFLDLAMAMK.A + Oxidation (M)         |
| 1688.98  | 1687.97  | 1687.86  | 67.2   | 272   | - 285 | 0    | R.YDLLLFLDLAMAMK.A + 2 Oxidation (M)       |
| 1692.99  | 1691.98  | 1691.96  | 10.3   | 52    | - 66  | 0    | R.FLKPPLEDEVSAHLK.V                        |
| 1744.97  | 1743.97  | 1743.95  | 7.56   | 292   | - 305 | 1    | R.FDEIVRQDELVLIR.S                         |
| 1904.95  | 1903.95  | 1903.95  | -4.66  | 32    | - 47  | 0    | R.DVHVQNHNLZIAQPEK.L                       |
| 2284.20  | 2283.20  | 2283.18  | 9.02   | 272   | - 291 | 1    | R.YDLLLFLDLAMAMKAGNVNR.F + Oxidation (M)   |
| 2300.21  | 2299.20  | 2299.17  | 14.5   | 272   | - 291 | 1    | R.YDLLLFLDLAMAMKAGNVNR.F + 2 Oxidation (M) |

No match to: 807.43, 842.51, 884.54, 913.45, 973.56, 995.53, 1009.58, 1033.51, 1036.56, 1098.49, 1109.54, 1114.49, 1174.57, 1179.58, 1192.75, 1207.71, 1234.65, 1277.70, 1307.66, 1308.62, 1323.66, 1365.72, 1383.70, 1392.71, 1426.75, 1441.69, 1461.74, 1475.75, 1493.71, 1557.70, 1638.85, 1707.77, 1716.83, 1794.84, 1837.95, 1889.88, 1926.89, 1942.92, 1994.06, 2013.11, 2150.16, 2211.10, 2225.12, 2357.12, 2510.10, 2705.09, 2788.25

2. [gi|28572018](#) Mass: 67234 Score: **60** Expect: 0.048 Queries matched: 14  
CG31033-PC, isoform C [Drosophila melanogaster]

| Observed | Mr(expt) | Mr(calc) | ppm    | Start | End   | Miss | Peptide                         |
|----------|----------|----------|--------|-------|-------|------|---------------------------------|
| 913.45   | 912.45   | 912.47   | -29.04 | 185   | - 191 | 1    | R.LMQYKSK.D + Oxidation (M)     |
| 935.48   | 934.48   | 934.48   | -3.49  | 435   | - 442 | 0    | R.SIACIETK.F + Propionamide (C) |
| 973.56   | 972.55   | 972.50   | 50.7   | 213   | - 220 | 1    | K.RDLEDAVR.E                    |
| 1036.56  | 1035.55  | 1035.61  | -53.82 | 37    | - 45  | 0    | R.LIDHVAQLK.A                   |
| 1174.57  | 1173.56  | 1173.52  | 34.1   | 1     | - 9   | 0    | -.MSTEEHVWR.A                   |
| 1392.71  | 1391.71  | 1391.75  | -30.41 | 407   | - 418 | 1    | K.VMAAKYQPEIK.V + Oxidation (M) |



|         |         |         |        |     |   |     |   |                                            |
|---------|---------|---------|--------|-----|---|-----|---|--------------------------------------------|
| 1437.74 | 1436.73 | 1436.76 | -16.70 | 398 | - | 411 | 1 | R.HTLTGHSGKVMMAK.Y                         |
| 1461.74 | 1460.73 | 1460.72 | 8.09   | 477 | - | 489 | 1 | R.TEKQADDVLMPAK.I + Oxidation (M)          |
| 1475.75 | 1474.74 | 1474.71 | 20.4   | 95  | - | 107 | 0 | K.GENSQMIVDLNQK.V                          |
| 1595.86 | 1594.85 | 1594.86 | -4.12  | 134 | - | 147 | 0 | R.AEVQLLHSSLEELK.K                         |
| 1692.99 | 1691.98 | 1691.86 | 68.2   | 518 | - | 531 | 1 | R.KNQVISTFTNEHFK.I                         |
| 1837.95 | 1836.95 | 1836.92 | 14.4   | 119 | - | 133 | 1 | K.EHSLVEQQTNNRRLR.A                        |
| 1926.89 | 1925.88 | 1925.94 | -29.61 | 310 | - | 325 | 1 | K.ILMKFEAHENESHAVR.W + Oxidation (M)       |
| 2357.12 | 2356.11 | 2356.12 | -3.85  | 572 | - | 594 | 0 | K.GHSTAVNAVSWSPNNMLASVGK.N + Oxidation (M) |

**No match to:** 807.43, 842.51, 884.54, 985.58, 988.55, 995.53, 1009.58, 1021.61, 1033.51, 1037.59, 1098.49, 1109.54, 1114.49, 1170.86, 1179.58, 1192.75, 1207.71, 1234.65, 1267.67, 1277.70, 1307.66, 1308.62, 1323.66, 1326.93, 1365.72, 1383.70, 1389.71, 1407.80, 1423.80, 1426.75, 1439.81, 1441.69, 1493.71, 1523.74, 1557.70, 1638.85, 1672.91, 1688.98, 1707.77, 1716.83, 1744.97, 1794.84, 1889.88, 1904.95, 1942.92, 1994.06, 2013.11, 2150.16, 2211.10, 2225.12, 2284.20, 2300.21, 2510.10, 2705.09, 2788.25

3. [gi|24644700](#) Mass: 24259 Score: 48 Expect: 0.71 Queries matched: 8

CG31488-PA [Drosophila melanogaster]

| Observed | Mr(expt) | Mr(calc) | ppm    | Start | End | Miss | Peptide |                                                |
|----------|----------|----------|--------|-------|-----|------|---------|------------------------------------------------|
| 935.48   | 934.48   | 934.46   | 15.5   | 1     | -   | 8    | 0       | -.MTPVICGK.T + Oxidation (M); Propionamide (C) |
| 1021.61  | 1020.60  | 1020.54  | 66.0   | 104   | -   | 111  | 1       | R.FVEDRSLR.F                                   |
| 1179.58  | 1178.57  | 1178.63  | -47.37 | 23    | -   | 32   | 1       | K.AFSTLVEREK.L                                 |
| 1389.71  | 1388.70  | 1388.74  | -31.71 | 2     | -   | 14   | 1       | M.TPVICGKTSQTVR.S                              |
| 1437.74  | 1436.73  | 1436.70  | 24.3   | 33    | -   | 45   | 0       | K.LSPCEAAVSELYR.T                              |
| 1837.95  | 1836.95  | 1836.87  | 42.0   | 115   | -   | 131  | 0       | R.IIVDSSSMGVMGHMFAR.C                          |
| 2211.10  | 2210.10  | 2210.24  | -62.58 | 185   | -   | 203  | 1       | R.YFIAFLPEKIIAIESLSTR.R                        |
| 2225.12  | 2224.11  | 2224.04  | 34.5   | 115   | -   | 134  | 1       | R.IIVDSSSMGVMGHMFARCGR.W + Propionamide (C)    |

**No match to:** 807.43, 842.51, 884.54, 913.45, 973.56, 985.58, 988.55, 995.53, 1009.58, 1033.51, 1036.56, 1037.59, 1098.49, 1109.54, 1114.49, 1170.86, 1174.57, 1192.75, 1207.71, 1234.65, 1267.67, 1277.70, 1307.66, 1308.62, 1323.66, 1326.93, 1365.72, 1383.70, 1389.71, 1407.80, 1423.80, 1426.75, 1439.81, 1441.69, 1461.74, 1475.75, 1493.71, 1523.74, 1557.70, 1595.86, 1638.85, 1672.91, 1688.98, 1692.99, 1707.77, 1716.83, 1744.97, 1794.84, 1889.88, 1904.95, 1926.89, 1942.92, 1994.06, 2013.11, 2150.16, 2284.20, 2300.21, 2357.12, 2510.10, 2705.09, 2788.25

4. [gi|24645344](#) Mass: 49959 Score: 46 Expect: 1.3 Queries matched: 9

CG9356-PA, isoform A [Drosophila melanogaster]

| Observed | Mr(expt) | Mr(calc) | ppm    | Start | End | Miss | Peptide |                                       |
|----------|----------|----------|--------|-------|-----|------|---------|---------------------------------------|
| 884.54   | 883.53   | 883.54   | -6.18  | 51    | -   | 57   | 1       | K.RPQLSRK.D                           |
| 1277.70  | 1276.70  | 1276.61  | 69.2   | 58    | -   | 69   | 0       | K.DSSVVQEAVMGR.K                      |
| 1461.74  | 1460.73  | 1460.67  | 42.1   | 211   | -   | 221  | 1       | R.DERNYFQAQYK.F                       |
| 1475.75  | 1474.74  | 1474.68  | 40.7   | 35    | -   | 48   | 0       | K.TESEIPASADVNDK.V                    |
| 1493.71  | 1492.71  | 1492.71  | -1.77  | 382   | -   | 395  | 0       | K.LSSASTSPLCEAEK.Y + Propionamide (C) |
| 1794.84  | 1793.84  | 1793.77  | 38.5   | 2     | -   | 18   | 1       | M.EANESAMPGTDSQACR.T                  |
| 1904.95  | 1903.95  | 1903.97  | -13.73 | 400   | -   | 416  | 0       | R.ALEFISQPLMATDEAIR.A                 |
| 2013.11  | 2012.10  | 2012.09  | 4.54   | 160   | -   | 177  | 1       | R.DKNNLDIAVLVDQVSTLR.T                |
| 2225.12  | 2224.11  | 2224.12  | -4.30  | 71    | -   | 91   | 0       | K.TSTSSGHSSNLPLPLGLHTLYR.R            |

**No match to:** 807.43, 842.51, 913.45, 935.48, 973.56, 985.58, 988.55, 995.53, 1009.58, 1021.61, 1033.51, 1036.56, 1037.59, 1098.49, 1109.54, 1114.49, 1170.86, 1174.57, 1192.75, 1207.71, 1234.65, 1267.67, 1277.70, 1307.66, 1308.62, 1323.66, 1326.93, 1365.72, 1383.70, 1389.71, 1392.71, 1407.80, 1423.80, 1426.75, 1437.74, 1439.81, 1441.69, 1523.74, 1557.70, 1595.86, 1638.85, 1672.91, 1688.98, 1692.99, 1707.77, 1716.83, 1744.97, 1837.95, 1889.88, 1926.89, 1942.92, 1994.06, 2150.16, 2211.10, 2284.20, 2300.21, 2357.12, 2510.10, 2705.09, 2788.25

5. [gi|46409138](#) Mass: 41280 Score: 44 Expect: 2 Queries matched: 9

RE57519p [Drosophila melanogaster]

| Observed | Mr(expt) | Mr(calc) | ppm    | Start | End | Miss | Peptide |                                                                |
|----------|----------|----------|--------|-------|-----|------|---------|----------------------------------------------------------------|
| 973.56   | 972.55   | 972.51   | 43.1   | 352   | -   | 359  | 1       | K.KNIPTCNI.- + Propionamide (C)                                |
| 995.53   | 994.52   | 994.53   | -10.93 | 293   | -   | 300  | 1       | K.KIYEEVSK.H                                                   |
| 1036.56  | 1035.55  | 1035.56  | -9.13  | 2     | -   | 10   | 0       | M.LAHNLGFHK.K                                                  |
| 1037.59  | 1036.58  | 1036.56  | 18.9   | 343   | -   | 350  | 0       | K.SDLIYWIK.K                                                   |
| 1277.70  | 1276.70  | 1276.69  | 2.86   | 220   | -   | 230  | 1       | K.KGGQNWFIK.S                                                  |
| 1392.71  | 1391.71  | 1391.78  | -54.13 | 340   | -   | 350  | 1       | K.NLKSGLIYWIK.K                                                |
| 1407.80  | 1406.79  | 1406.72  | 50.6   | 294   | -   | 304  | 1       | K.IYEEVSKHFQK.L                                                |
| 1437.74  | 1436.73  | 1436.74  | -8.87  | 13    | -   | 24   | 1       | R.LFSNMKAVLQDR.G + Oxidation (M)                               |
| 2788.25  | 2787.24  | 2787.32  | -27.88 | 251   | -   | 274  | 0       | K.VADCICLMSMGHLESVPVDIHIYR.I + Oxidation (M); Propionamide (C) |

**No match to:** 807.43, 842.51, 884.54, 913.45, 935.48, 985.58, 988.55, 1009.58, 1021.61, 1033.51, 1098.49, 1109.54, 1114.49, 1170.86, 1174.57, 1179.58, 1192.75, 1207.71, 1234.65, 1267.67, 1307.66, 1308.62, 1323.66, 1326.93, 1365.72, 1383.70, 1389.71, 1423.80, 1426.75, 1439.81, 1441.69, 1461.74, 1475.75, 1493.71, 1523.74, 1557.70, 1595.86, 1638.85, 1672.91, 1688.98, 1692.99, 1707.77, 1716.83, 1744.97, 1794.84, 1837.95, 1889.88, 1904.95, 1926.89, 1942.92, 1994.06, 2013.11, 2150.16, 2211.10, 2225.12, 2284.20, 2300.21, 2357.12, 2510.10, 2705.09

6. [gi|125986859](#) Mass: 24518 Score: 43 Expect: 2.3 Queries matched: 7

GA21566-PA [Drosophila pseudoobscura]

| Observed | Mr(expt) | Mr(calc) | ppm    | Start | End | Miss | Peptide |                                   |
|----------|----------|----------|--------|-------|-----|------|---------|-----------------------------------|
| 842.51   | 841.50   | 841.45   | 64.3   | 212   | -   | 219  | 1       | K.AAKAMHIT.-                      |
| 1179.58  | 1178.57  | 1178.56  | 11.5   | 179   | -   | 188  | 0       | R.GTDELICTTR.R + Propionamide (C) |
| 1234.65  | 1233.64  | 1233.62  | 16.8   | 190   | -   | 200  | 1       | R.SIDEVTESARK.G                   |
| 1308.62  | 1307.61  | 1307.64  | -20.38 | 200   | -   | 211  | 1       | R.KGMDEISVQASK.A + Oxidation (M)  |

1426.75 1425.75 1425.66 63.4 73 - 85 1 K.SCFASERSTVDPK.T  
 1638.85 1637.84 1637.84 3.19 88 - 100 1 R.QMVLKTNLTLFCR.N + Propionamide (C)  
 1904.95 1903.95 1903.93 5.36 25 - 41 0 K.YPNMTPSIIGTDVVER.Q + Oxidation (M)  
**No match to:** 807.43, 884.54, 913.45, 935.48, 973.56, 985.58, 988.55, 995.53, 1009.58, 1021.61, 1033.51, 1036.56, 1037.59, 1098.49, 1109.54, 1114.49, 1170.86, 1174.57, 1179.58, 1192.75, 1207.71, 1234.65, 1267.67, 1277.70, 1307.66, 1323.66, 1326.93, 1365.72, 1383.70, 1389.71, 1392.71, 1407.80, 1423.80, 1437.74, 1439.81, 1441.69, 1461.74, 1475.75, 1493.71, 1523.74, 1557.70, 1595.86, 1672.91, 1688.98, 1692.99, 1707.77, 1716.83, 1744.97, 1794.84, 1837.95, 1889.88, 1926.89, 1942.92, 1994.06, 2013.11, 2150.16, 2211.10, 2225.12, 2284.20, 2300.21, 2357.12, 2510.10, 2705.09, 2788.25

7. [gi|28572022](#) Mass: 48918 Score: 43 Expect: 2.3 Queries matched: 10

CG31033-PB, isoform B [Drosophila melanogaster]

| Observed | Mr(expt) | Mr(calc) | ppm    | Start | End | Miss | Peptide                                      |
|----------|----------|----------|--------|-------|-----|------|----------------------------------------------|
| 913.45   | 912.45   | 912.47   | -29.04 | 26    | -   | 32   | 1 R.LMQYKSK.D + Oxidation (M)                |
| 935.48   | 934.48   | 934.48   | -3.49  | 276   | -   | 283  | 0 R.SIACIETK.F + Propionamide (C)            |
| 973.56   | 972.55   | 972.50   | 50.7   | 54    | -   | 61   | 1 K.RDLEDAVR.E                               |
| 1036.56  | 1035.55  | 1035.48  | 68.7   | 229   | -   | 236  | 0 R.VWTVMDNR.L + Oxidation (M)               |
| 1392.71  | 1391.71  | 1391.75  | -30.41 | 248   | -   | 259  | 1 K.VMAAKYVQPEIK.V + Oxidation (M)           |
| 1437.74  | 1436.73  | 1436.76  | -16.70 | 239   | -   | 252  | 1 R.HTLTGHSQKVMMAK.Y                         |
| 1461.74  | 1460.73  | 1460.72  | 8.09   | 318   | -   | 330  | 1 R.TEKQADDVLMPEAK.I + Oxidation (M)         |
| 1692.99  | 1691.98  | 1691.86  | 68.2   | 359   | -   | 372  | 1 R.KNQVISTFTNEHFK.I                         |
| 1926.89  | 1925.88  | 1925.94  | -29.61 | 151   | -   | 166  | 1 K.ILMKFEAHENESHAVR.W + Oxidation (M)       |
| 2357.12  | 2356.11  | 2356.12  | -3.85  | 413   | -   | 435  | 0 K.GHSTAVNAVSWSPNNMLASVQK.N + Oxidation (M) |

**No match to:** 807.43, 842.51, 884.54, 985.58, 988.55, 995.53, 1009.58, 1021.61, 1033.51, 1037.59, 1098.49, 1109.54, 1114.49, 1170.86, 1174.57, 1179.58, 1192.75, 1207.71, 1234.65, 1267.67, 1277.70, 1307.66, 1308.62, 1323.66, 1326.93, 1365.72, 1383.70, 1389.71, 1407.80, 1423.80, 1426.75, 1439.81, 1441.69, 1475.75, 1493.71, 1523.74, 1557.70, 1595.86, 1638.85, 1672.91, 1688.98, 1707.77, 1716.83, 1744.97, 1794.84, 1837.95, 1889.88, 1904.95, 1942.92, 1994.06, 2013.11, 2150.16, 2211.10, 2225.12, 2284.20, 2300.21, 2510.10, 2705.09, 2788.25

8. [gi|28572020](#) Mass: 45678 Score: 43 Expect: 2.5 Queries matched: 9

CG31033-PA, isoform A [Drosophila melanogaster]

| Observed | Mr(expt) | Mr(calc) | ppm    | Start | End | Miss | Peptide                                      |
|----------|----------|----------|--------|-------|-----|------|----------------------------------------------|
| 935.48   | 934.48   | 934.48   | -3.49  | 250   | -   | 257  | 0 R.SIACIETK.F + Propionamide (C)            |
| 973.56   | 972.55   | 972.50   | 50.7   | 28    | -   | 35   | 1 K.RDLEDAVR.E                               |
| 1036.56  | 1035.55  | 1035.48  | 68.7   | 203   | -   | 210  | 0 R.VWTVMDNR.L + Oxidation (M)               |
| 1392.71  | 1391.71  | 1391.75  | -30.41 | 222   | -   | 233  | 1 K.VMAAKYVQPEIK.V + Oxidation (M)           |
| 1437.74  | 1436.73  | 1436.76  | -16.70 | 213   | -   | 226  | 1 R.HTLTGHSQKVMMAK.Y                         |
| 1461.74  | 1460.73  | 1460.72  | 8.09   | 292   | -   | 304  | 1 R.TEKQADDVLMPEAK.I + Oxidation (M)         |
| 1692.99  | 1691.98  | 1691.86  | 68.2   | 333   | -   | 346  | 1 R.KNQVISTFTNEHFK.I                         |
| 1926.89  | 1925.88  | 1925.94  | -29.61 | 125   | -   | 140  | 1 K.ILMKFEAHENESHAVR.W + Oxidation (M)       |
| 2357.12  | 2356.11  | 2356.12  | -3.85  | 387   | -   | 409  | 0 K.GHSTAVNAVSWSPNNMLASVQK.N + Oxidation (M) |

**No match to:** 807.43, 842.51, 884.54, 913.45, 985.58, 988.55, 995.53, 1009.58, 1021.61, 1033.51, 1037.59, 1098.49, 1109.54, 1114.49, 1170.86, 1174.57, 1179.58, 1192.75, 1207.71, 1234.65, 1267.67, 1277.70, 1307.66, 1308.62, 1323.66, 1326.93, 1365.72, 1383.70, 1389.71, 1407.80, 1423.80, 1426.75, 1439.81, 1441.69, 1475.75, 1493.71, 1523.74, 1557.70, 1595.86, 1638.85, 1672.91, 1688.98, 1707.77, 1716.83, 1744.97, 1794.84, 1837.95, 1889.88, 1904.95, 1942.92, 1994.06, 2013.11, 2150.16, 2211.10, 2225.12, 2284.20, 2300.21, 2510.10, 2705.09, 2788.25

9. [gi|34398667](#) Mass: 68439 Score: 42 Expect: 3 Queries matched: 10

heat shock protein 68 [Drosophila simulans]

| Observed | Mr(expt) | Mr(calc) | ppm    | Start | End | Miss | Peptide                                      |
|----------|----------|----------|--------|-------|-----|------|----------------------------------------------|
| 807.43   | 806.42   | 806.38   | 46.8   | 510   | -   | 516  | 0 R.MLSEAEK.Y                                |
| 1323.66  | 1322.65  | 1322.64  | 10.8   | 69    | -   | 79   | 1 R.FDSDKIQDDIK.H                            |
| 1389.71  | 1388.70  | 1388.72  | -14.04 | 229   | -   | 239  | 1 R.LVNHFAEEFKR.K                            |
| 1392.71  | 1391.71  | 1391.71  | -1.37  | 558   | -   | 569  | 1 K.NSILERCSETIK.W                           |
| 1426.75  | 1425.75  | 1425.74  | 4.05   | 74    | -   | 84   | 1 K.IQDDIKHWPFK.V                            |
| 1557.70  | 1556.69  | 1556.78  | -55.65 | 118   | -   | 131  | 1 K.MKETAEAYLGTTVK.D + Oxidation (M)         |
| 1716.83  | 1715.82  | 1715.79  | 14.8   | 586   | -   | 599  | 1 K.LKEMEQCSPIMTK.M + 2 Oxidation (M)        |
| 2013.11  | 2012.10  | 2011.96  | 69.5   | 100   | -   | 117  | 1 K.GADKCFSPPEEISSMVLTK.M + Propionamide (C) |
| 2211.10  | 2210.10  | 2210.06  | 16.5   | 532   | -   | 551  | 1 R.NQLETYVFAVKEAAENGDR.I                    |
| 2300.21  | 2299.20  | 2299.24  | -16.78 | 462   | -   | 483  | 1 R.GVPKIDVTFDLDANGILNVTAK.E                 |

**No match to:** 842.51, 884.54, 913.45, 935.48, 973.56, 985.58, 988.55, 995.53, 1009.58, 1021.61, 1033.51, 1036.56, 1037.59, 1098.49, 1109.54, 1114.49, 1170.86, 1174.57, 1179.58, 1192.75, 1207.71, 1234.65, 1267.67, 1277.70, 1307.66, 1308.62, 1323.66, 1326.93, 1365.72, 1383.70, 1389.71, 1407.80, 1423.80, 1426.75, 1439.81, 1441.69, 1461.74, 1475.75, 1493.71, 1523.74, 1557.70, 1595.86, 1638.85, 1672.91, 1688.98, 1692.99, 1707.77, 1744.97, 1794.84, 1837.95, 1889.88, 1904.95, 1926.89, 1942.92, 1994.06, 2150.16, 2225.12, 2284.20, 2357.12, 2510.10, 2705.09, 2788.25

10. [gi|34420078](#) Mass: 69192 Score: 42 Expect: 3.2 Queries matched: 10

heat shock protein 68 [Drosophila sechellia]

| Observed | Mr(expt) | Mr(calc) | ppm    | Start | End | Miss | Peptide                              |
|----------|----------|----------|--------|-------|-----|------|--------------------------------------|
| 807.43   | 806.42   | 806.38   | 46.8   | 510   | -   | 516  | 0 R.MLSEAEK.Y                        |
| 1323.66  | 1322.65  | 1322.64  | 10.8   | 69    | -   | 79   | 1 R.FDSDKIQDDIK.H                    |
| 1389.71  | 1388.70  | 1388.72  | -14.04 | 229   | -   | 239  | 1 R.LVNHFAEEFKR.K                    |
| 1392.71  | 1391.71  | 1391.71  | -1.37  | 558   | -   | 569  | 1 K.NSILERCSETIK.W                   |
| 1426.75  | 1425.75  | 1425.74  | 4.05   | 74    | -   | 84   | 1 K.IQDDIKHWPFK.V                    |
| 1557.70  | 1556.69  | 1556.78  | -55.65 | 118   | -   | 131  | 1 K.MKETAEAYLGTTVK.D + Oxidation (M) |

|         |         |         |        |     |   |     |   |                                            |
|---------|---------|---------|--------|-----|---|-----|---|--------------------------------------------|
| 1716.83 | 1715.82 | 1715.79 | 14.8   | 586 | - | 599 | 1 | K.LKEMEQQFCSPIMTK.M + 2 Oxidation (M)      |
| 2013.11 | 2012.10 | 2011.96 | 69.5   | 100 | - | 117 | 1 | K.GADKCFSPPEEISSMVLTK.M + Propionamide (C) |
| 2211.10 | 2210.10 | 2210.06 | 16.5   | 532 | - | 551 | 1 | R.NQLETYVFAVKEAAENGDR.I                    |
| 2300.21 | 2299.20 | 2299.24 | -16.78 | 462 | - | 483 | 1 | R.GVPKIDVTFDLDANGILNVTAK.E                 |

**No match to:** 842.51, 884.54, 913.45, 935.48, 973.56, 985.58, 988.55, 995.53, 1009.58, 1021.61, 1033.51, 1036.56, 1037.59, 1098.49, 1109.54, 1114.49, 1170.86, 1174.57, 1179.58, 1192.75, 1207.71, 1234.65, 1267.67, 1277.70, 1307.66, 1308.62, 1326.93, 1365.72, 1383.70, 1407.80, 1423.80, 1437.74, 1439.81, 1441.69, 1461.74, 1475.75, 1493.71, 1523.74, 1595.86, 1638.85, 1672.91, 1688.98, 1692.99, 1707.77, 1744.97, 1794.84, 1837.95, 1889.88, 1904.95, 1926.89, 1942.92, 1994.06, 2150.16, 2225.12, 2284.20, 2357.12, 2510.10, 2705.09, 2788.25

11. [gi|24645058](#) Mass: 40088 Score: 42 Expect: 3.2 Queries matched: 11

steamer duck CG7954-PC, isoform C [Drosophila melanogaster]

| Observed | Mr (expt) | Mr (calc) | ppm    | Start | End | Miss | Peptide |                                                            |
|----------|-----------|-----------|--------|-------|-----|------|---------|------------------------------------------------------------|
| 807.43   | 806.42    | 806.38    | 54.9   | 108   | -   | 113  | 0       | R.CQLCAK.E + 2 Propionamide (C)                            |
| 995.53   | 994.52    | 994.48    | 43.5   | 114   | -   | 122  | 0       | K.ELADCGFIK.N                                              |
| 1267.67  | 1266.66   | 1266.64   | 19.9   | 138   | -   | 148  | 1       | K.AEITGRYVCQK.C                                            |
| 1383.70  | 1382.69   | 1382.64   | 37.3   | 324   | -   | 333  | 1       | K.CYDRFPNELR.R + Propionamide (C)                          |
| 1392.71  | 1391.71   | 1391.66   | 36.1   | 232   | -   | 242  | 0       | K.HWHVEHFVCAK.C                                            |
| 1716.83  | 1715.82   | 1715.77   | 26.7   | 205   | -   | 218  | 1       | R.CHDKMGIPICGACR.R + 3 Propionamide (C)                    |
| 1904.95  | 1903.95   | 1903.87   | 39.4   | 6     | -   | 23   | 0       | K.AEVVQAANMSLGMHCTR.C + Oxidation (M)                      |
| 1942.92  | 1941.91   | 1941.97   | -29.97 | 209   | -   | 224  | 1       | K.MGIPICGACRRPIEER.V + 2 Propionamide (C)                  |
| 1994.06  | 1993.05   | 1992.95   | 49.3   | 188   | -   | 204  | 0       | K.SRPGLAANDMNELYCLR.C + Propionamide (C)                   |
| 2211.10  | 2210.10   | 2209.95   | 65.0   | 291   | -   | 309  | 1       | K.AWCVHHFACSVCDTKMTQK.S + Oxidation (M)                    |
| 2225.12  | 2224.11   | 2223.98   | 60.4   | 96    | -   | 113  | 1       | K.AMSASWHPQCFRCQLCAK.E + Oxidation (M); 2 Propionamide (C) |

**No match to:** 842.51, 884.54, 913.45, 935.48, 973.56, 985.58, 988.55, 1009.58, 1021.61, 1033.51, 1036.56, 1037.59, 1098.49, 1109.54, 1114.49, 1170.86, 1174.57, 1179.58, 1192.75, 1207.71, 1234.65, 1277.70, 1307.66, 1308.62, 1326.93, 1365.72, 1389.71, 1407.80, 1423.80, 1426.75, 1437.74, 1439.81, 1441.69, 1461.74, 1475.75, 1493.71, 1523.74, 1557.70, 1595.86, 1638.85, 1672.91, 1688.98, 1692.99, 1707.77, 1744.97, 1794.84, 1837.95, 1889.88, 1926.89, 2013.11, 2150.16, 2284.20, 2300.21, 2357.12, 2510.10, 2705.09, 2788.25

12. [gi|13446608](#) Mass: 135668 Score: 40 Expect: 4.8 Queries matched: 15

putative helicase Ski2 [Drosophila melanogaster]

| Observed | Mr (expt) | Mr (calc) | ppm    | Start | End | Miss | Peptide |                                           |
|----------|-----------|-----------|--------|-------|-----|------|---------|-------------------------------------------|
| 807.43   | 806.42    | 806.40    | 32.9   | 479   | -   | 485  | 1       | K.EMQGKAK.G + Oxidation (M)               |
| 913.45   | 912.45    | 912.50    | -60.83 | 1167  | -   | 1175 | 0       | R.IGNPGLQSK.M                             |
| 973.56   | 972.55    | 972.59    | -38.41 | 871   | -   | 879  | 0       | K.AIDIISITK.S                             |
| 995.53   | 994.52    | 994.49    | 32.2   | 633   | -   | 640  | 1       | K.KFDGLEMR.N                              |
| 1234.65  | 1233.64   | 1233.63   | 6.59   | 486   | -   | 498  | 1       | K.GGGGGPRNHLNAK.Q                         |
| 1407.80  | 1406.79   | 1406.78   | 9.73   | 304   | -   | 315  | 1       | R.DLTRTIYTSPK.A                           |
| 1475.75  | 1474.74   | 1474.68   | 37.5   | 1     | -   | 12   | 1       | -.MNEIRGEDNLER.L                          |
| 1493.71  | 1492.71   | 1492.74   | -21.21 | 179   | -   | 192  | 1       | K.LTRSEETSSTGTPK.S                        |
| 1523.74  | 1522.73   | 1522.83   | -66.37 | 548   | -   | 560  | 1       | K.GAVQKFFLQCLAK.L + Propionamide (C)      |
| 1692.99  | 1691.98   | 1691.96   | 8.36   | 698   | -   | 711  | 1       | R.YAVILTCLRIESIK.V + Propionamide (C)     |
| 1904.95  | 1903.95   | 1903.99   | -23.77 | 274   | -   | 290  | 1       | K.LEQRQYVFAAHTSAGK.T                      |
| 1926.89  | 1925.88   | 1926.00   | -61.59 | 853   | -   | 870  | 0       | R.NMTFQPVGIGGHTVLDIK.A                    |
| 1942.92  | 1941.91   | 1942.00   | -44.58 | 853   | -   | 870  | 0       | R.NMTFQPVGIGGHTVLDIK.A + Oxidation (M)    |
| 1994.06  | 1993.05   | 1992.93   | 62.2   | 233   | -   | 249  | 0       | K.SDWAEMVDISQPINNFK.E                     |
| 2357.12  | 2356.11   | 2356.13   | -6.98  | 634   | -   | 653  | 1       | K.FDGLEMRNLKPGYIQMAGR.A + 2 Oxidation (M) |

**No match to:** 842.51, 884.54, 935.48, 985.58, 988.55, 1009.58, 1021.61, 1033.51, 1036.56, 1037.59, 1098.49, 1109.54, 1114.49, 1170.86, 1174.57, 1179.58, 1192.75, 1207.71, 1267.67, 1277.70, 1307.66, 1308.62, 1323.66, 1326.93, 1365.72, 1383.70, 1389.71, 1392.71, 1423.80, 1426.75, 1437.74, 1439.81, 1441.69, 1461.74, 1557.70, 1595.86, 1638.85, 1672.91, 1688.98, 1707.77, 1716.83, 1744.97, 1794.84, 1837.95, 1889.88, 2013.11, 2150.16, 2211.10, 2225.12, 2284.20, 2300.21, 2510.10, 2705.09, 2788.25

13. [gi|17933658](#) Mass: 135682 Score: 40 Expect: 4.8 Queries matched: 15

twister CG10210-PA [Drosophila melanogaster]

| Observed | Mr (expt) | Mr (calc) | ppm    | Start | End | Miss | Peptide |                                        |
|----------|-----------|-----------|--------|-------|-----|------|---------|----------------------------------------|
| 807.43   | 806.42    | 806.40    | 32.9   | 479   | -   | 485  | 1       | K.EMQGKAK.G + Oxidation (M)            |
| 913.45   | 912.45    | 912.50    | -60.83 | 1167  | -   | 1175 | 0       | R.IGNPGLQSK.M                          |
| 973.56   | 972.55    | 972.59    | -38.41 | 871   | -   | 879  | 0       | K.AIDIISITK.S                          |
| 995.53   | 994.52    | 994.49    | 32.2   | 633   | -   | 640  | 1       | K.KFDGLEMR.N                           |
| 1234.65  | 1233.64   | 1233.63   | 6.59   | 486   | -   | 498  | 1       | K.GGGGGPRNHLNAK.Q                      |
| 1407.80  | 1406.79   | 1406.78   | 9.73   | 304   | -   | 315  | 1       | R.DLTRTIYTSPK.A                        |
| 1475.75  | 1474.74   | 1474.68   | 37.5   | 1     | -   | 12   | 1       | -.MNEIRGEDNLER.L                       |
| 1493.71  | 1492.71   | 1492.74   | -21.21 | 179   | -   | 192  | 1       | K.LTRSEETSSTGTPK.S                     |
| 1523.74  | 1522.73   | 1522.83   | -66.37 | 548   | -   | 560  | 1       | K.GAVQKFFLQCLAK.L + Propionamide (C)   |
| 1692.99  | 1691.98   | 1691.96   | 8.36   | 698   | -   | 711  | 1       | R.YAVILTCLRIESIK.V + Propionamide (C)  |
| 1904.95  | 1903.95   | 1903.99   | -23.77 | 274   | -   | 290  | 1       | K.LEQRQYVFAAHTSAGK.T                   |
| 1926.89  | 1925.88   | 1926.00   | -61.59 | 853   | -   | 870  | 0       | R.NMTFQPVGIGGHTVLDIK.A                 |
| 1942.92  | 1941.91   | 1942.00   | -44.58 | 853   | -   | 870  | 0       | R.NMTFQPVGIGGHTVLDIK.A + Oxidation (M) |
| 1994.06  | 1993.05   | 1992.93   | 62.2   | 233   | -   | 249  | 0       | K.SDWAEMVDISQPINNFK.E                  |

2357.12 2356.11 2356.13 -6.98 634 - 653 1 K.FDGLMERNLKPGEYIQMAGR.A + 2 Oxidation (M)  
**No match to:** 842.51, 884.54, 935.48, 985.58, 988.55, 1009.58, 1021.61, 1033.51, 1036.56, 1037.59, 1098.49, 1109.54, 1114.49, 1170.86, 1174.57, 1179.58, 1192.75, 1207.71, 1267.67, 1277.70, 1307.66, 1308.62, 1323.66, 1326.93, 1365.72, 1383.70, 1389.71, 1392.71, 1423.80, 1426.75, 1437.74, 1439.81, 1441.69, 1461.74, 1557.70, 1595.86, 1638.85, 1672.91, 1688.98, 1707.77, 1716.83, 1744.97, 1794.84, 1837.95, 1889.88, 2013.11, 2150.16, 2211.10, 2225.12, 2284.20, 2300.21, 2510.10, 2705.09, 2788.25

14. [gi|125806738](#) Mass: 23562 Score: 40 Expect: 4.9 Queries matched: 6

GA17076-PA [*Drosophila pseudoobscura*]

| Observed | Mr(expt) | Mr(calc) | ppm    | Start | End | Miss | Peptide                                             |
|----------|----------|----------|--------|-------|-----|------|-----------------------------------------------------|
| 1036.56  | 1035.55  | 1035.50  | 51.6   | 131   | -   | 139  | 1 K.KEEGEAFAR.E                                     |
| 1323.66  | 1322.65  | 1322.70  | -39.23 | 20    | -   | 30   | 1 K.SCLLLQFTDKR.F                                   |
| 1392.71  | 1391.71  | 1391.65  | 39.9   | 140   | -   | 151  | 0 R.EHGLVFMETSAR.T + Oxidation (M)                  |
| 1475.75  | 1474.74  | 1474.83  | -58.90 | 78    | -   | 91   | 1 R.GAAGALLVYDITRR.E                                |
| 2284.20  | 2283.20  | 2283.22  | -9.80  | 9     | -   | 29   | 1 K.YIIIGDTGVGKSCLLQFTDK.R                          |
| 2510.10  | 2509.09  | 2509.11  | -6.61  | 187   | -   | 213  | 0 K.IGQQHSPTNPSLPGSGGAGAANSGCC.- + Propionamide (C) |

**No match to:** 807.43, 842.51, 884.54, 913.45, 935.48, 973.56, 985.58, 988.55, 995.53, 1009.58, 1021.61, 1033.51, 1037.59, 1098.49, 1109.54, 1114.49, 1170.86, 1174.57, 1179.58, 1192.75, 1207.71, 1234.65, 1267.67, 1277.70, 1307.66, 1308.62, 1326.93, 1365.72, 1383.70, 1389.71, 1407.80, 1423.80, 1426.75, 1437.74, 1439.81, 1441.69, 1461.74, 1493.71, 1523.74, 1557.70, 1595.86, 1638.85, 1672.91, 1688.98, 1692.99, 1707.77, 1716.83, 1744.97, 1794.84, 1837.95, 1889.88, 1904.95, 1926.89, 1942.92, 1994.06, 2013.11, 2150.16, 2211.10, 2225.12, 2300.21, 2357.12, 2705.09, 2788.25

15. [gi|17737847](#) Mass: 38665 Score: 38 Expect: 7.1 Queries matched: 10

steamer duck CG7954-PA, isoform A [*Drosophila melanogaster*]

| Observed | Mr(expt) | Mr(calc) | ppm    | Start | End | Miss | Peptide                                                       |
|----------|----------|----------|--------|-------|-----|------|---------------------------------------------------------------|
| 807.43   | 806.42   | 806.38   | 54.9   | 95    | -   | 100  | 0 R.CQLCAK.E + 2 Propionamide (C)                             |
| 995.53   | 994.52   | 994.48   | 43.5   | 101   | -   | 109  | 0 K.ELADCGFIK.N                                               |
| 1267.67  | 1266.66  | 1266.64  | 19.9   | 125   | -   | 135  | 1 K.AEITGRYVCQK.C                                             |
| 1383.70  | 1382.69  | 1382.64  | 37.3   | 311   | -   | 320  | 1 K.CYDRFPNELR.R + Propionamide (C)                           |
| 1392.71  | 1391.71  | 1391.66  | 36.1   | 219   | -   | 229  | 0 K.HHWVHFVCAK.C                                              |
| 1716.83  | 1715.82  | 1715.77  | 26.7   | 192   | -   | 205  | 1 R.CHDKMGIPICGACR.R + 3 Propionamide (C)                     |
| 1942.92  | 1941.91  | 1941.97  | -29.97 | 196   | -   | 211  | 1 K.MGIPICGACRRPIEER.V + 2 Propionamide (C)                   |
| 1994.06  | 1993.05  | 1992.95  | 49.3   | 175   | -   | 191  | 0 K.SRPGLAANDMNELYCLR.C + Propionamide (C)                    |
| 2211.10  | 2210.10  | 2209.96  | 63.9   | 2     | -   | 20   | 1 M.SLGAMHCTRCADGFEPTEK.I + Oxidation (M); 2 Propionamide (C) |
| 2225.12  | 2224.11  | 2223.98  | 60.4   | 83    | -   | 100  | 1 K.AMSASWHPQCFCRQLCAK.E + Oxidation (M); 2 Propionamide (C)  |

**No match to:** 842.51, 884.54, 913.45, 935.48, 973.56, 985.58, 988.55, 1009.58, 1021.61, 1033.51, 1036.56, 1037.59, 1098.49, 1109.54, 1114.49, 1170.86, 1174.57, 1179.58, 1192.75, 1207.71, 1234.65, 1277.70, 1307.66, 1308.62, 1323.66, 1326.93, 1365.72, 1383.70, 1389.71, 1407.80, 1423.80, 1426.75, 1437.74, 1439.81, 1441.69, 1461.74, 1475.75, 1493.71, 1523.74, 1557.70, 1595.86, 1638.85, 1672.91, 1688.98, 1692.99, 1707.77, 1744.97, 1794.84, 1837.95, 1889.88, 1904.95, 1926.89, 2013.11, 2150.16, 2284.20, 2300.21, 2357.12, 2510.10, 2705.09, 2788.25

16. [gi|25012563](#) Mass: 37492 Score: 38 Expect: 7.9 Queries matched: 9

RE37740p [*Drosophila melanogaster*]

| Observed | Mr(expt) | Mr(calc) | ppm    | Start | End | Miss | Peptide                               |
|----------|----------|----------|--------|-------|-----|------|---------------------------------------|
| 935.48   | 934.48   | 934.44   | 35.5   | 272   | -   | 279  | 0 R.ATAECLK.S + Propionamide (C)      |
| 973.56   | 972.55   | 972.51   | 43.1   | 37    | -   | 45   | 0 K.DCLPISGLR.E                       |
| 988.55   | 987.54   | 987.58   | -37.50 | 102   | -   | 109  | 0 K.CITLQVLK.A + Propionamide (C)     |
| 1036.56  | 1035.55  | 1035.53  | 24.0   | 126   | -   | 134  | 0 K.VSNLLMTDK.G + Oxidation (M)       |
| 1179.58  | 1178.57  | 1178.62  | -41.84 | 1     | -   | 10   | 0 -.MHLTHSVNLK.S                      |
| 1392.71  | 1391.71  | 1391.73  | -19.46 | 123   | -   | 134  | 1 R.DLKVSNNLMTDK.G + Oxidation (M)    |
| 1437.74  | 1436.73  | 1436.74  | -3.40  | 126   | -   | 138  | 1 K.VSNLLMTDKGCIK.V + Oxidation (M)   |
| 1475.75  | 1474.74  | 1474.76  | -12.74 | 52    | -   | 62   | 1 K.QCHHENIVRLR.E + Propionamide (C)  |
| 1716.83  | 1715.82  | 1715.93  | -65.70 | 37    | -   | 51   | 1 K.DCLPISGLREIMILK.Q + Oxidation (M) |

**No match to:** 807.43, 842.51, 884.54, 913.45, 985.58, 995.53, 1009.58, 1021.61, 1033.51, 1037.59, 1098.49, 1109.54, 1114.49, 1170.86, 1174.57, 1192.75, 1207.71, 1234.65, 1267.67, 1277.70, 1307.66, 1308.62, 1323.66, 1326.93, 1365.72, 1383.70, 1389.71, 1407.80, 1423.80, 1426.75, 1439.81, 1441.69, 1461.74, 1493.71, 1523.74, 1557.70, 1595.86, 1638.85, 1672.91, 1688.98, 1692.99, 1707.77, 1744.97, 1794.84, 1837.95, 1889.88, 1904.95, 1926.89, 1942.92, 1994.06, 2013.11, 2150.16, 2211.10, 2225.12, 2284.20, 2300.21, 2357.12, 2510.10, 2705.09, 2788.25

17. [gi|2612998](#) Mass: 44349 Score: 38 Expect: 8.5 Queries matched: 8

vermillion [*Drosophila pallidosa*]

| Observed | Mr(expt) | Mr(calc) | ppm    | Start | End | Miss | Peptide                                |
|----------|----------|----------|--------|-------|-----|------|----------------------------------------|
| 807.43   | 806.42   | 806.44   | -21.99 | 157   | -   | 162  | 1 R.VRYNQK.Y                           |
| 1267.67  | 1266.66  | 1266.66  | 2.65   | 70    | -   | 79   | 0 K.QIIFEFDSIR.D                       |
| 1383.70  | 1382.69  | 1382.74  | -33.51 | 273   | -   | 284  | 0 R.ALQGAIMITFYR.D                     |
| 1439.81  | 1438.80  | 1438.76  | 29.1   | 251   | -   | 263  | 0 R.SIFDPAVHDALVR.R                    |
| 1493.71  | 1492.71  | 1492.73  | -14.25 | 36    | -   | 48   | 1 K.LLDAQMLSKEDK.R                     |
| 1595.86  | 1594.85  | 1594.86  | -4.98  | 251   | -   | 264  | 1 R.SIFDPAVHDALVRR.G                   |
| 1926.89  | 1925.88  | 1925.99  | -56.44 | 269   | -   | 284  | 1 R.FSHRALQGAIMITFYR.D + Oxidation (M) |
| 2225.12  | 2224.11  | 2224.06  | 24.8   | 193   | -   | 210  | 1 R.WLERTPGLEESGFNFWEK.F               |

**No match to:** 842.51, 884.54, 913.45, 935.48, 973.56, 985.58, 988.55, 995.53, 1009.58, 1021.61, 1033.51, 1036.56, 1037.59, 1098.49, 1109.54, 1114.49, 1170.86, 1174.57, 1179.58, 1192.75, 1207.71, 1234.65, 1267.67, 1277.70, 1307.66, 1308.62, 1323.66, 1326.93, 1365.72, 1383.70, 1389.71, 1407.80, 1423.80, 1426.75, 1437.74, 1441.69, 1461.74, 1475.75, 1493.71, 1523.74, 1557.70, 1595.86, 1638.85, 1672.91, 1688.98, 1692.99, 1707.77, 1716.83, 1744.97, 1794.84, 1837.95, 1889.88, 1904.95, 1942.92, 1994.06, 2013.11, 2150.16, 2211.10, 2284.20, 2300.21, 2357.12, 2510.10, 2705.09, 2788.25

18. [gi|2612996](#) Mass: 44342 Score: 38 Expect: 8.5 Queries matched: 8

vermillion [Drosophila ananassae]

| Observed | Mr(expt) | Mr(calc) | ppm    | Start | End | Miss | Peptide                                |
|----------|----------|----------|--------|-------|-----|------|----------------------------------------|
| 807.43   | 806.42   | 806.44   | -21.99 | 157   | -   | 162  | 1 R.VRYNQK.Y                           |
| 1267.67  | 1266.66  | 1266.66  | 2.65   | 70    | -   | 79   | 0 K.QIIFEFDSIR.D                       |
| 1383.70  | 1382.69  | 1382.74  | -33.51 | 273   | -   | 284  | 0 R.ALQGAIMITFYR.D                     |
| 1439.81  | 1438.80  | 1438.76  | 29.1   | 251   | -   | 263  | 0 R.SIFDPAVHDALVR.R                    |
| 1493.71  | 1492.71  | 1492.73  | -14.25 | 36    | -   | 48   | 1 K.LLDAQCMLSKEDEK.R                   |
| 1595.86  | 1594.85  | 1594.86  | -4.98  | 251   | -   | 264  | 1 R.SIFDPAVHDALVRR.G                   |
| 1926.89  | 1925.88  | 1925.99  | -56.44 | 269   | -   | 284  | 1 R.FSHRALQGAIMITFYR.D + Oxidation (M) |
| 2225.12  | 2224.11  | 2224.06  | 24.8   | 193   | -   | 210  | 1 R.WLERTPGLEESGFNFWEK.F               |

**No match to:** 842.51, 884.54, 913.45, 935.48, 973.56, 985.58, 988.55, 995.53, 1009.58, 1021.61, 1033.51, 1036.56, 1037.59, 1098.49, 1109.54, 1114.49, 1170.86, 1174.57, 1179.58, 1192.75, 1207.71, 1234.65, 1277.70, 1307.66, 1308.62, 1323.66, 1326.93, 1365.72, 1389.71, 1392.71, 1407.80, 1423.80, 1426.75, 1437.74, 1441.69, 1461.74, 1475.75, 1523.74, 1557.70, 1638.85, 1672.91, 1688.98, 1692.99, 1707.77, 1716.83, 1744.97, 1794.84, 1837.95, 1889.88, 1904.95, 1942.92, 1994.06, 2013.11, 2150.16, 2211.10, 2284.20, 2300.21, 2357.12, 2510.10, 2705.09, 2788.25

19. [gi|24640802](#) Mass: 105649 Score: 37 Expect: 10 Queries matched: 12

CG32703-PA [Drosophila melanogaster]

| Observed | Mr(expt) | Mr(calc) | ppm    | Start | End | Miss | Peptide                                                      |
|----------|----------|----------|--------|-------|-----|------|--------------------------------------------------------------|
| 1009.58  | 1008.57  | 1008.57  | 1.32   | 118   | -   | 126  | 1 R.GNVLKDVKH.R                                              |
| 1098.49  | 1097.49  | 1097.52  | -27.66 | 664   | -   | 673  | 0 K.DSITFGTCVR.E                                             |
| 1179.58  | 1178.57  | 1178.63  | -48.52 | 139   | -   | 148  | 0 K.FIHSGNVIHR.D                                             |
| 1308.62  | 1307.61  | 1307.58  | 21.0   | 287   | -   | 297  | 0 K.NCCDDGISLVK.A + 2 Propionamide (C)                       |
| 1383.70  | 1382.69  | 1382.66  | 22.0   | 664   | -   | 675  | 1 K.DSITFGTCVRER.I                                           |
| 1392.71  | 1391.71  | 1391.75  | -33.19 | 165   | -   | 177  | 1 K.VADFGLARTLSSR.R                                          |
| 1461.74  | 1460.73  | 1460.80  | -47.09 | 200   | -   | 212  | 1 R.APEILVASRNYTK.G                                          |
| 1672.91  | 1671.91  | 1671.90  | 4.99   | 149   | -   | 162  | 1 R.DLKPSNILIDSKCR.L + Propionamide (C)                      |
| 1794.84  | 1793.84  | 1793.88  | -24.89 | 867   | -   | 881  | 0 K.LAQNDQEELPVHKK.A                                         |
| 1904.95  | 1903.95  | 1903.94  | 1.24   | 729   | -   | 746  | 0 R.ALPEGIGGPGSQNYEIFR.Q                                     |
| 1926.89  | 1925.88  | 1925.85  | 18.2   | 361   | -   | 378  | 1 R.ETSCSNRTVSNSTPSSNR.D                                     |
| 2357.12  | 2356.11  | 2356.14  | -10.12 | 209   | -   | 228  | 1 R.NYTKGIDMWGLGCILGEMIR.Q + Oxidation (M); Propionamide (C) |

**No match to:** 807.43, 842.51, 884.54, 913.45, 935.48, 973.56, 985.58, 988.55, 995.53, 1021.61, 1033.51, 1036.56, 1037.59, 1109.54, 1114.49, 1170.86, 1174.57, 1192.75, 1207.71, 1234.65, 1267.67, 1277.70, 1307.66, 1323.66, 1326.93, 1365.72, 1389.71, 1407.80, 1423.80, 1426.75, 1437.74, 1439.81, 1441.69, 1475.75, 1493.71, 1523.74, 1557.70, 1595.86, 1638.85, 1688.98, 1692.99, 1707.77, 1716.83, 1744.97, 1837.95, 1889.88, 1942.92, 1994.06, 2013.11, 2150.16, 2211.10, 2225.12, 2284.20, 2300.21, 2510.10, 2705.09, 2788.25

20. [gi|24645056](#) Mass: 39701 Score: 37 Expect: 10 Queries matched: 10

steamer duck CG7954-PB, isoform B [Drosophila melanogaster]

| Observed | Mr(expt) | Mr(calc) | ppm    | Start | End | Miss | Peptide                                                      |
|----------|----------|----------|--------|-------|-----|------|--------------------------------------------------------------|
| 807.43   | 806.42   | 806.38   | 54.9   | 105   | -   | 110  | 0 R.CQLCAK.E + 2 Propionamide (C)                            |
| 995.53   | 994.52   | 994.48   | 43.5   | 111   | -   | 119  | 0 K.ELADCGFIK.N                                              |
| 1267.67  | 1266.66  | 1266.64  | 19.9   | 135   | -   | 145  | 1 K.AEITGRYVCQK.C                                            |
| 1383.70  | 1382.69  | 1382.64  | 37.3   | 321   | -   | 330  | 1 K.CYDRFPNELR.R + Propionamide (C)                          |
| 1392.71  | 1391.71  | 1391.66  | 36.1   | 229   | -   | 239  | 0 K.HWHVEHFVCAK.C                                            |
| 1716.83  | 1715.82  | 1715.77  | 26.7   | 202   | -   | 215  | 1 R.CHDKMGIPICGACR.R + 3 Propionamide (C)                    |
| 1942.92  | 1941.91  | 1941.97  | -29.97 | 206   | -   | 221  | 1 K.MGIPICGACRRPIEER.V + 2 Propionamide (C)                  |
| 1994.06  | 1993.05  | 1992.95  | 49.3   | 185   | -   | 201  | 0 K.SRPGLAANDMNELYCLR.C + Propionamide (C)                   |
| 2211.10  | 2210.10  | 2209.95  | 65.0   | 288   | -   | 306  | 1 K.AWCVVHVFACSVCDTKMTQK.S + Oxidation (M)                   |
| 2225.12  | 2224.11  | 2223.98  | 60.4   | 93    | -   | 110  | 1 K.AMSASWHPQCFCRQLCAK.E + Oxidation (M); 2 Propionamide (C) |

**No match to:** 842.51, 884.54, 913.45, 935.48, 973.56, 985.58, 988.55, 1009.58, 1021.61, 1033.51, 1036.56, 1037.59, 1098.49, 1109.54, 1114.49, 1170.86, 1174.57, 1179.58, 1192.75, 1207.71, 1234.65, 1277.70, 1307.66, 1308.62, 1323.66, 1326.93, 1365.72, 1389.71, 1407.80, 1423.80, 1426.75, 1437.74, 1439.81, 1441.69, 1461.74, 1475.75, 1493.71, 1523.74, 1557.70, 1595.86, 1638.85, 1672.91, 1688.98, 1692.99, 1707.77, 1716.83, 1744.97, 1794.84, 1837.95, 1889.88, 1904.95, 1926.89, 2013.11, 2150.16, 2284.20, 2300.21, 2357.12, 2510.10, 2705.09, 2788.25

## Search Parameters

Type of search : Peptide Mass Fingerprint  
 Enzyme : Trypsin  
 Variable modifications : Oxidation (M), Propionamide (C)  
 Mass values : Monoisotopic  
 Protein Mass : Unrestricted  
 Peptide Mass Tolerance : ± 70 ppm  
 Peptide Charge State : 1+  
 Max Missed Cleavages : 1  
 Number of queries : 69

Mascot: <http://www.matrixscience.com/>

# Mascot Search Results

**User** : Ilya  
**Email** : toropygin@rambler.ru  
**Search title** : Submitted from Shidlovsky 080324 II by Mascot Daemon on P4P800SE  
**MS data file** : \\192.168.0.18\data on ultraflex-2\DATA\2008\_Ilya\Shidlovsky\080325\004\0\_J14\1\004\_0\_J14\_1.dar  
**Database** : NCBIInr 20070307 (4984280 sequences; 1723577896 residues)  
**Taxonomy** : Drosophila (fruit flies) (47828 sequences)  
**Timestamp** : 3 Apr 2008 at 21:52:41 GMT  
**Top Score** : 164 for **Mixture 1**, gi|17137484 + gi|45549124

## Probability Based Mowse Score

Protein score is  $-10 \cdot \log(P)$ , where P is the probability that the observed match is a random event. Protein scores greater than 59 are significant ( $p < 0.05$ ).

Score Distribution

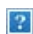

## Protein Summary Report

|                              |                      |
|------------------------------|----------------------|
| Protein Summary              | <a href="#">Help</a> |
| Significance threshold $p <$ | Max. number of hits  |

## Overview Table

Click on column header to jump to entry in results list.  
 Move mouse over any indicator to highlight identical peptides.  
 Click on an indicator to see details of individual match.  
 Use check boxes to select sub-set of queries for new search.

Mouse over:

| Hit:                         | 1 | 2 | 3 | 4 | 5 | 6 | 7 | 8 | 9 | 10 | 11 | 12 | 13 | 14 | 15 | 16 | 17 | 18 | 19 | 20 |
|------------------------------|---|---|---|---|---|---|---|---|---|----|----|----|----|----|----|----|----|----|----|----|
| <a href="#">807.46</a> (1+)  |   |   |   |   |   |   |   |   |   |    |    | ?  | ?  |    | ?  | ?  |    |    |    | ?  |
| <a href="#">829.41</a> (1+)  |   |   |   |   |   |   |   |   |   |    |    | ?  | ?  |    | ?  | ?  |    |    |    |    |
| <a href="#">842.51</a> (1+)  |   |   |   |   |   |   |   | ? |   |    |    |    |    |    |    |    |    |    |    |    |
| <a href="#">913.46</a> (1+)  |   |   |   |   |   |   |   |   |   |    |    | ?  | ?  |    | ?  | ?  |    |    |    |    |
| <a href="#">967.49</a> (1+)  |   |   |   |   |   |   |   |   |   |    |    |    |    |    |    |    |    |    |    |    |
| <a href="#">973.54</a> (1+)  |   |   |   |   |   |   |   |   |   |    |    | ?  |    |    |    |    |    |    |    |    |
| <a href="#">995.57</a> (1+)  |   |   |   |   |   |   |   |   |   |    |    |    |    |    |    |    |    |    | ?  | ?  |
| <a href="#">1005.59</a> (1+) | ? |   |   | ? | ? |   |   | ? | ? |    |    | ?  | ?  |    | ?  | ?  |    |    |    |    |
| <a href="#">1036.57</a> (1+) |   |   |   |   |   |   |   |   |   |    |    | ?  |    |    |    |    |    |    |    |    |
| <a href="#">1066.55</a> (1+) |   |   |   |   |   |   |   |   |   |    |    |    |    |    |    |    |    |    |    |    |
| <a href="#">1070.61</a> (1+) | ? |   |   | ? | ? |   |   |   |   |    |    |    |    |    |    |    |    |    |    |    |
| <a href="#">1089.61</a> (1+) |   |   |   |   |   |   |   |   |   |    |    |    |    |    |    |    |    |    |    |    |
| <a href="#">1106.65</a> (1+) | ? | ? | ? | ? | ? |   |   | ? | ? | ?  | ?  |    |    |    |    |    |    |    |    |    |



## Index

| Accession                        | Mass   | Score | Description                                                              |
|----------------------------------|--------|-------|--------------------------------------------------------------------------|
| 1. <a href="#">Mixture 1</a>     |        | 164   | gi 17137484 + gi 45549124                                                |
| 2. <a href="#">gi 17137484</a>   | 51903  | 102   | Origin recognition complex subunit 4 CG2917-PA [Drosophila melanogaster] |
| 3. <a href="#">gi 5081628</a>    | 51733  | 91    | origin recognition complex subunit 4 [Drosophila melanogaster]           |
| 4. <a href="#">gi 45549124</a>   | 51622  | 67    | Yolk protein 2 CG2979-PA [Drosophila melanogaster]                       |
| 5. <a href="#">gi 14424471</a>   | 49630  | 59    | Vitellogenin-2 precursor (Vitellogenin II) (Yolk protein 2)              |
| 6. <a href="#">gi 24583092</a>   | 37944  | 45    | GlcAT-S CG3881-PA, isoform A [Drosophila melanogaster]                   |
| 7. <a href="#">gi 24653739</a>   | 57721  | 44    | Cyp6a19 CG10243-PA [Drosophila melanogaster]                             |
| 8. <a href="#">gi 16768768</a>   | 36749  | 43    | LD02462p [Drosophila melanogaster]                                       |
| 9. <a href="#">gi 24649395</a>   | 43739  | 42    | Rpn9 CG10230-PA, isoform A [Drosophila melanogaster]                     |
| 10. <a href="#">gi 19920690</a>  | 97906  | 41    | CG17840-PA [Drosophila melanogaster]                                     |
| 11. <a href="#">gi 125977986</a> | 120600 | 40    | GA20622-PA [Drosophila pseudoobscura]                                    |
| 12. <a href="#">gi 6649053</a>   | 64394  | 40    | dynein [Drosophila mauritiana]                                           |
| 13. <a href="#">gi 6649055</a>   | 64364  | 40    | dynein [Drosophila yakuba]                                               |
| 14. <a href="#">gi 58613897</a>  | 39244  | 39    | SR-CIV [Drosophila simulans]                                             |
| 15. <a href="#">gi 6649009</a>   | 65715  | 39    | dynein [Drosophila melanogaster]                                         |
| 16. <a href="#">gi 6649051</a>   | 64846  | 38    | dynein [Drosophila sechellia]                                            |
| 17. <a href="#">gi 24581132</a>  | 42670  | 38    | CG31948-PB, isoform B [Drosophila melanogaster]                          |
| 18. <a href="#">gi 24641704</a>  | 170230 | 38    | strawberry notch CG1903-PB, isoform B [Drosophila melanogaster]          |
| 19. <a href="#">gi 2078282</a>   | 170361 | 38    | Sno [Drosophila melanogaster]                                            |
| 20. <a href="#">gi 24658169</a>  | 79930  | 36    | CG4611-PA [Drosophila melanogaster]                                      |

## Results List

1. **Mixture 1** Total score: **164** Expect: 1.9e-012 Queries matched: 27  
 Components: 1. [gi|17137484](#) Origin recognition complex subunit 4 CG2917-PA [Drosophila melanogaster]  
 2. [gi|45549124](#) Yolk protein 2 CG2979-PA [Drosophila melanogaster]

| Observed | Mr(expt) | Mr(calc) | ppm    | Start | End   | Miss | Comp | Peptide                                  |
|----------|----------|----------|--------|-------|-------|------|------|------------------------------------------|
| 1005.59  | 1004.58  | 1004.54  | 41.1   | 171   | - 178 | 0    | 2    | K.LVQAYQQR.Y                             |
| 1070.61  | 1069.61  | 1069.57  | 39.1   | 65    | - 73  | 0    | 2    | R.EVEELPNLK.E                            |
| 1106.65  | 1105.65  | 1105.63  | 16.9   | 202   | - 210 | 0    | 1    | R.QVFLFPSLR.R                            |
| 1133.68  | 1132.67  | 1132.64  | 32.0   | 170   | - 178 | 1    | 2    | R.KLVQAYQQR.Y                            |
| 1267.70  | 1266.69  | 1266.66  | 24.9   | 1     | - 10  | 1    | 2    | -.MQYNLVRCLK.K                           |
| 1319.71  | 1318.71  | 1318.71  | -5.68  | 128   | - 138 | 0    | 2    | K.IEFNLNTLVEK.V                          |
| 1374.64  | 1373.63  | 1373.66  | -24.25 | 364   | - 374 | 0    | 1    | R.DSFNFEIYAR.F                           |
| 1424.71  | 1423.70  | 1423.68  | 9.96   | 370   | - 381 | 0    | 2    | R.YFAESVRPGNER.N                         |
| 1522.66  | 1521.65  | 1521.66  | -9.30  | 254   | - 266 | 0    | 1    | R.NHFDPGEYGFSPR.L                        |
| 1536.74  | 1535.73  | 1535.74  | -3.98  | 437   | - 448 | 0    | 2    | K.QTGYHQVHPWR.Q                          |
| 1590.74  | 1589.73  | 1589.74  | -3.75  | 382   | - 395 | 0    | 2    | R.NFPSVAASSYQYK.Q                        |
| 1604.80  | 1603.79  | 1603.79  | 0.14   | 102   | - 116 | 0    | 1    | K.SITVQMQLENAADGK.V                      |
| 1611.89  | 1610.88  | 1610.92  | -26.09 | 63    | - 77  | 0    | 1    | K.TTLINSVLADLLPNK.S                      |
| 1620.81  | 1619.80  | 1619.78  | 13.0   | 102   | - 116 | 0    | 1    | K.SITVQMQLENAADGK.V + Oxidation (M)      |
| 1656.90  | 1655.89  | 1655.89  | -2.08  | 402   | - 419 | 0    | 1    | R.IAELIMPLTGGAGGVGK.V + Oxidation (M)    |
| 1687.82  | 1686.81  | 1686.86  | -31.46 | 43    | - 58  | 0    | 1    | R.TAEMGESNSLLLLGPR.G                     |
| 1703.84  | 1702.83  | 1702.86  | -12.71 | 43    | - 58  | 0    | 1    | R.TAEMGESNSLLLLGPR.G + Oxidation (M)     |
| 1716.81  | 1715.80  | 1715.82  | -14.29 | 429   | - 442 | 0    | 1    | K.LALTYSQIHHCQR.Y + Oxidation (M)        |
| 1754.92  | 1753.91  | 1753.98  | -40.50 | 221   | - 237 | 0    | 1    | R.DLLSLPTGNSLLLAEEK.I                    |
| 1791.83  | 1790.83  | 1790.85  | -12.94 | 254   | - 268 | 1    | 1    | R.NHFDPGEYGFSPRLR.D                      |
| 1796.96  | 1795.96  | 1796.01  | -28.17 | 308   | - 323 | 0    | 1    | R.LVAHLRPQSPHITAEK.M                     |
| 1886.90  | 1885.89  | 1885.97  | -39.31 | 238   | - 253 | 0    | 1    | K.IYNLQNIQSGALYFSR.N                     |
| 1950.90  | 1949.89  | 1949.97  | -42.69 | 286   | - 302 | 0    | 1    | R.STLQALHDFDISEAYLK.N                    |
| 1955.85  | 1954.84  | 1954.91  | -35.48 | 48    | - 64  | 0    | 2    | R.SNSLDNVEQPSNWNVPR.E                    |
| 2198.89  | 2197.88  | 2197.97  | -39.29 | 319   | - 339 | 0    | 2    | R.GDADFVDIHTSAYGMGTSQR.L                 |
| 2214.88  | 2213.87  | 2213.96  | -41.17 | 319   | - 339 | 0    | 2    | R.GDADFVDIHTSAYGMGTSQR.L + Oxidation (M) |
| 2252.97  | 2251.96  | 2252.08  | -55.16 | 78    | - 97  | 0    | 1    | K.SFGENTLIVHLDGNLHTDDR.V                 |

No match to: 807.46, 829.41, 842.51, 913.46, 967.49, 973.54, 995.57, 1036.57, 1066.55, 1089.61, 1109.53, 1179.63, 1234.67, 1252.64, 1265.66, 1277.70, 1307.68, 1308.67, 1320.64, 1323.71, 1365.66, 1381.66, 1383.69, 1397.69, 1434.76, 1475.76, 1493.74, 1515.73, 1519.70, 1641.83, 1707.74, 1759.87, 1838.87

2. [gi|17137484](#) Mass: 51903 Score: **102** Expect: 3e-006 Queries matched: 16  
 Origin recognition complex subunit 4 CG2917-PA [Drosophila melanogaster]

| Observed | Mr(expt) | Mr(calc) | ppm    | Start | End   | Miss | Peptide             |
|----------|----------|----------|--------|-------|-------|------|---------------------|
| 1106.65  | 1105.65  | 1105.63  | 16.9   | 202   | - 210 | 0    | R.QVFLFPSLR.R       |
| 1374.64  | 1373.63  | 1373.66  | -24.25 | 364   | - 374 | 0    | R.DSFNFEIYAR.F      |
| 1522.66  | 1521.65  | 1521.66  | -9.30  | 254   | - 266 | 0    | R.NHFDPGEYGFSPR.L   |
| 1604.80  | 1603.79  | 1603.79  | 0.14   | 102   | - 116 | 0    | K.SITVQMQLENAADGK.V |
| 1611.89  | 1610.88  | 1610.92  | -26.09 | 63    | - 77  | 0    | K.TTLINSVLADLLPNK.S |



|         |         |         |        |     |       |   |                                        |
|---------|---------|---------|--------|-----|-------|---|----------------------------------------|
| 1620.81 | 1619.80 | 1619.78 | 13.0   | 102 | - 116 | 0 | K.SITVQMQLENAADGK.V + Oxidation (M)    |
| 1656.90 | 1655.89 | 1655.89 | -2.08  | 402 | - 419 | 0 | R.IAELIMPLTGGAGGGVVK.V + Oxidation (M) |
| 1687.82 | 1686.81 | 1686.86 | -31.46 | 43  | - 58  | 0 | R.TAEMGESNSLLLLGPR.G                   |
| 1703.84 | 1702.83 | 1702.86 | -12.71 | 43  | - 58  | 0 | R.TAEMGESNSLLLLGPR.G + Oxidation (M)   |
| 1716.81 | 1715.80 | 1715.82 | -14.29 | 429 | - 442 | 0 | K.LALTYSQIHHCQR.Y + Oxidation (M)      |
| 1754.92 | 1753.91 | 1753.98 | -40.50 | 221 | - 237 | 0 | R.DLLSLPTGNSLLLAEEK.I                  |
| 1791.83 | 1790.83 | 1790.85 | -12.94 | 254 | - 268 | 1 | R.NHFDPGEYGFSPRLR.D                    |
| 1796.96 | 1795.96 | 1796.01 | -28.17 | 308 | - 323 | 0 | R.LVAHLRQPSPHITAEK.M                   |
| 1886.90 | 1885.89 | 1885.97 | -39.31 | 238 | - 253 | 0 | K.IYNLQNIQSGALYFSR.N                   |
| 1950.90 | 1949.89 | 1949.97 | -42.69 | 286 | - 302 | 0 | R.STLQALHDFDISEAYLK.N                  |
| 2252.97 | 2251.96 | 2252.08 | -55.16 | 78  | - 97  | 0 | K.SFGENTLIVHLDGNLHTDDR.V               |

**No match to:** 807.46, 829.41, 842.51, 913.46, 967.49, 973.54, 995.57, 1005.59, 1036.57, 1066.55, 1070.61, 1089.61, 1109.53, 1133.68, 1179.63, 1234.67, 1252.64, 1265.66, 1267.70, 1277.70, 1307.68, 1308.67, 1319.71, 1320.64, 1323.71, 1365.66, 1381.66, 1383.69, 1397.69, 1424.71, 1434.76, 1475.76, 1493.74, 1515.73, 1519.70, 1536.74, 1590.74, 1641.83, 1707.74, 1759.87, 1838.87, 1955.85, 2198.89, 2214.88

3. [gi|5081628](#) Mass: 51733 Score: 91 Expect: 3.9e-005 Queries matched: 15

origin recognition complex subunit 4 [Drosophila melanogaster]

| Observed | Mr(expt) | Mr(calc) | ppm    | Start | End   | Miss | Peptide                                |
|----------|----------|----------|--------|-------|-------|------|----------------------------------------|
| 1106.65  | 1105.65  | 1105.63  | 16.9   | 202   | - 210 | 0    | R.QVFLFPSLR.R                          |
| 1374.64  | 1373.63  | 1373.66  | -24.25 | 363   | - 373 | 0    | R.DSFNFEEIYAR.F                        |
| 1522.66  | 1521.65  | 1521.66  | -9.30  | 253   | - 265 | 0    | R.NHFDPGEYGFSPR.L                      |
| 1604.80  | 1603.79  | 1603.79  | 0.14   | 102   | - 116 | 0    | K.SITVQMQLENAADGK.V                    |
| 1611.89  | 1610.88  | 1610.92  | -26.09 | 63    | - 77  | 0    | K.TTLINSVLADLLPNK.S                    |
| 1620.81  | 1619.80  | 1619.78  | 13.0   | 102   | - 116 | 0    | K.SITVQMQLENAADGK.V + Oxidation (M)    |
| 1656.90  | 1655.89  | 1655.89  | -2.08  | 401   | - 418 | 0    | R.IAELIMPLTGGAGGGVVK.V + Oxidation (M) |
| 1687.82  | 1686.81  | 1686.86  | -31.46 | 43    | - 58  | 0    | R.TAEMGESNSLLLLGPR.G                   |
| 1703.84  | 1702.83  | 1702.86  | -12.71 | 43    | - 58  | 0    | R.TAEMGESNSLLLLGPR.G + Oxidation (M)   |
| 1716.81  | 1715.80  | 1715.82  | -14.29 | 428   | - 441 | 0    | K.LALTYSQIHHCQR.Y + Oxidation (M)      |
| 1791.83  | 1790.83  | 1790.85  | -12.94 | 253   | - 267 | 1    | R.NHFDPGEYGFSPRLR.D                    |
| 1796.96  | 1795.96  | 1796.01  | -28.17 | 307   | - 322 | 0    | R.LVAHLRQPSPHITAEK.M                   |
| 1886.90  | 1885.89  | 1885.97  | -39.31 | 237   | - 252 | 0    | K.IYNLQNIQSGALYFSR.N                   |
| 1950.90  | 1949.89  | 1949.97  | -42.69 | 285   | - 301 | 0    | R.STLQALHDFDISEAYLK.N                  |
| 2252.97  | 2251.96  | 2252.08  | -55.16 | 78    | - 97  | 0    | K.SFGENTLIVHLDGNLHTDDR.V               |

**No match to:** 807.46, 829.41, 842.51, 913.46, 967.49, 973.54, 995.57, 1005.59, 1036.57, 1066.55, 1070.61, 1089.61, 1109.53, 1133.68, 1179.63, 1234.67, 1252.64, 1265.66, 1267.70, 1277.70, 1307.68, 1308.67, 1319.71, 1320.64, 1323.71, 1365.66, 1381.66, 1383.69, 1397.69, 1424.71, 1434.76, 1475.76, 1493.74, 1515.73, 1519.70, 1536.74, 1590.74, 1641.83, 1707.74, 1754.92, 1759.87, 1838.87, 1955.85, 2198.89, 2214.88

4. [gi|45549124](#) Mass: 51622 Score: 67 Expect: 0.011 Queries matched: 12

Yolk protein 2 CG2979-PA [Drosophila melanogaster]

| Observed | Mr(expt) | Mr(calc) | ppm    | Start | End   | Miss | Peptide                                   |
|----------|----------|----------|--------|-------|-------|------|-------------------------------------------|
| 1005.59  | 1004.58  | 1004.54  | 41.1   | 171   | - 178 | 0    | K.LVQAYQQR.Y                              |
| 1070.61  | 1069.61  | 1069.57  | 39.1   | 65    | - 73  | 0    | R.EVEELPNLK.E                             |
| 1106.65  | 1105.65  | 1105.59  | 53.5   | 118   | - 127 | 1    | R.GYIVGERGQK.I                            |
| 1133.68  | 1132.67  | 1132.64  | 32.0   | 170   | - 178 | 1    | R.KLVQAYQQR.Y                             |
| 1267.70  | 1266.69  | 1266.66  | 24.9   | 1     | - 10  | 1    | -.MQYNLVRCLK.K                            |
| 1319.71  | 1318.71  | 1318.71  | -5.68  | 128   | - 138 | 0    | K.IEFNLNTLVEK.V                           |
| 1424.71  | 1423.70  | 1423.68  | 9.96   | 370   | - 381 | 0    | R.YFAESVRPNER.N                           |
| 1536.74  | 1535.73  | 1535.74  | -3.98  | 437   | - 448 | 0    | K.QTGYHQVHPWR.Q                           |
| 1590.74  | 1589.73  | 1589.74  | -3.75  | 382   | - 395 | 0    | R.NFPSVAASSYQYK.Q                         |
| 1955.85  | 1954.84  | 1954.91  | -35.48 | 48    | - 64  | 0    | R.SNSLDNVEQPSNWNPR.E                      |
| 2198.89  | 2197.88  | 2197.97  | -39.29 | 319   | - 339 | 0    | R.GDADFVDIAHTSAYGMGTSQR.L                 |
| 2214.88  | 2213.87  | 2213.96  | -41.17 | 319   | - 339 | 0    | R.GDADFVDIAHTSAYGMGTSQR.L + Oxidation (M) |

**No match to:** 807.46, 829.41, 842.51, 913.46, 967.49, 973.54, 995.57, 1036.57, 1066.55, 1089.61, 1109.53, 1179.63, 1234.67, 1252.64, 1265.66, 1277.70, 1307.68, 1308.67, 1320.64, 1323.71, 1365.66, 1374.64, 1381.66, 1383.69, 1397.69, 1434.76, 1475.76, 1493.74, 1515.73, 1519.70, 1522.66, 1604.80, 1611.89, 1620.81, 1641.83, 1656.90, 1687.82, 1703.84, 1707.74, 1716.81, 1754.92, 1759.87, 1791.83, 1796.96, 1838.87, 1886.90, 1950.90, 2252.97

5. [gi|14424471](#) Mass: 49630 Score: 59 Expect: 0.065 Queries matched: 11

Vitellogenin-2 precursor (Vitellogenin II) (Yolk protein 2)

| Observed | Mr(expt) | Mr(calc) | ppm   | Start | End   | Miss | Peptide         |
|----------|----------|----------|-------|-------|-------|------|-----------------|
| 1005.59  | 1004.58  | 1004.54  | 41.1  | 154   | - 161 | 0    | K.LVQAYQQR.Y    |
| 1070.61  | 1069.61  | 1069.57  | 39.1  | 48    | - 56  | 0    | R.EVEELPNLK.E   |
| 1106.65  | 1105.65  | 1105.59  | 53.5  | 101   | - 110 | 1    | R.GYIVGERGQK.I  |
| 1133.68  | 1132.67  | 1132.64  | 32.0  | 153   | - 161 | 1    | R.KLVQAYQQR.Y   |
| 1319.71  | 1318.71  | 1318.71  | -5.68 | 111   | - 121 | 0    | K.IEFNLNTLVEK.V |
| 1424.71  | 1423.70  | 1423.68  | 9.96  | 353   | - 364 | 0    | R.YFAESVRPNER.N |

|         |         |         |        |     |   |     |   |                                          |
|---------|---------|---------|--------|-----|---|-----|---|------------------------------------------|
| 1536.74 | 1535.73 | 1535.74 | -3.98  | 420 | - | 431 | 0 | K.QTGYHQVHPWR.Q                          |
| 1590.74 | 1589.73 | 1589.74 | -3.75  | 365 | - | 378 | 0 | R.NFPSVAASSYQYK.Q                        |
| 1955.85 | 1954.84 | 1954.91 | -35.48 | 31  | - | 47  | 0 | R.SNSLDNVEQPSNWNPR.E                     |
| 2198.89 | 2197.88 | 2197.97 | -39.29 | 302 | - | 322 | 0 | R.GDADFVDIHTSAYGMGTSQR.L                 |
| 2214.88 | 2213.87 | 2213.96 | -41.17 | 302 | - | 322 | 0 | R.GDADFVDIHTSAYGMGTSQR.L + Oxidation (M) |

**No match to:** 807.46, 829.41, 842.51, 913.46, 967.49, 973.54, 995.57, 1036.57, 1066.55, 1089.61, 1109.53, 1179.63, 1234.67, 1252.64, 1265.66, 1267.70, 1277.70, 1307.68, 1308.67, 1320.64, 1323.71, 1365.66, 1374.64, 1381.66, 1383.69, 1397.69, 1434.76, 1475.76, 1493.74, 1515.73, 1519.70, 1522.66, 1604.80, 1611.89, 1620.81, 1641.83, 1656.90, 1687.82, 1703.84, 1707.74, 1716.81, 1754.92, 1759.87, 1791.83, 1796.96, 1838.87, 1886.90, 1950.90, 2252.97

6. [gi|24583092](#) Mass: 37944 Score: 45 Expect: 1.4 Queries matched: 9

GlcAT-S CG3881-PA, isoform A [Drosophila melanogaster]

| Observed | Mr(expt) | Mr(calc) | ppm    | Start | End | Miss | Peptide |                                                   |
|----------|----------|----------|--------|-------|-----|------|---------|---------------------------------------------------|
| 1179.63  | 1178.62  | 1178.68  | -48.78 | 286   | -   | 296  | 0       | R.SNLGALLHNLK.L                                   |
| 1234.67  | 1233.66  | 1233.64  | 18.4   | 2     | -   | 11   | 1       | M.NLFENENKVK.D                                    |
| 1308.67  | 1307.66  | 1307.71  | -34.55 | 119   | -   | 130  | 1       | R.NEKPAPRGVANR.R                                  |
| 1319.71  | 1318.71  | 1318.70  | 1.80   | 193   | -   | 204  | 0       | K.VVAFLDSSWVAGR.R                                 |
| 1365.66  | 1364.65  | 1364.68  | -18.29 | 1     | -   | 11   | 1       | -.MNLFENENKVK.D                                   |
| 1381.66  | 1380.66  | 1380.67  | -10.94 | 1     | -   | 11   | 1       | -.MNLFENENKVK.D + Oxidation (M)                   |
| 1383.69  | 1382.68  | 1382.63  | 32.9   | 297   | -   | 309  | 0       | K.LMGVTSTTESEGR.N + Oxidation (M)                 |
| 1475.76  | 1474.75  | 1474.80  | -35.83 | 193   | -   | 205  | 1       | K.VVAFLDSSWVAGR.R                                 |
| 1493.74  | 1492.74  | 1492.63  | 68.8   | 91    | -   | 101  | 0       | K.CNDYMDTLLYR.F + Oxidation (M); Propionamide (C) |

**No match to:** 807.46, 829.41, 842.51, 913.46, 967.49, 973.54, 995.57, 1005.59, 1036.57, 1066.55, 1070.61, 1089.61, 1106.65, 1109.53, 1133.68, 1252.64, 1265.66, 1267.70, 1277.70, 1307.68, 1320.64, 1323.71, 1374.64, 1397.69, 1424.71, 1434.76, 1515.73, 1519.70, 1522.66, 1536.74, 1590.74, 1604.80, 1611.89, 1620.81, 1641.83, 1656.90, 1687.82, 1703.84, 1707.74, 1716.81, 1754.92, 1759.87, 1791.83, 1796.96, 1838.87, 1886.90, 1950.90, 1955.85, 2198.89, 2214.88, 2252.97

7. [gi|24653739](#) Mass: 57721 Score: 44 Expect: 2 Queries matched: 11

Cyp6a19 CG10243-PA [Drosophila melanogaster]

| Observed | Mr(expt) | Mr(calc) | ppm    | Start | End | Miss | Peptide |                                    |
|----------|----------|----------|--------|-------|-----|------|---------|------------------------------------|
| 1005.59  | 1004.58  | 1004.53  | 52.2   | 134   | -   | 142  | 0       | K.LTHTFTSAK.M                      |
| 1106.65  | 1105.65  | 1105.61  | 30.7   | 92    | -   | 100  | 1       | K.TVLIRDFDK.F                      |
| 1374.64  | 1373.63  | 1373.58  | 32.0   | 268   | -   | 278  | 0       | R.NDFMDTLIDMK.Q + 2 Oxidation (M)  |
| 1381.66  | 1380.66  | 1380.71  | -37.31 | 252   | -   | 262  | 1       | K.IVQDTIDYRMK.R                    |
| 1383.69  | 1382.68  | 1382.73  | -36.46 | 377   | -   | 388  | 0       | R.IATKPYQHSNPK.Y                   |
| 1397.69  | 1396.69  | 1396.70  | -10.42 | 252   | -   | 262  | 1       | K.IVQDTIDYRMK.R + Oxidation (M)    |
| 1493.74  | 1492.74  | 1492.75  | -11.30 | 333   | -   | 345  | 1       | R.AEIDSVLERYNGK.L                  |
| 1536.74  | 1535.73  | 1535.76  | -19.47 | 417   | -   | 428  | 1       | K.FIPERFDEEQVK.K                   |
| 1641.83  | 1640.82  | 1640.87  | -31.39 | 218   | -   | 231  | 0       | R.HGWLVDLLIFGMPK.L + Oxidation (M) |
| 1656.90  | 1655.89  | 1655.81  | 47.9   | 203   | -   | 216  | 1       | K.AEFVQMGYSALRER.R                 |
| 1707.74  | 1706.74  | 1706.83  | -56.69 | 248   | -   | 260  | 1       | K.FYMKIVQDTIDYR.M + Oxidation (M)  |

**No match to:** 807.46, 829.41, 842.51, 913.46, 967.49, 973.54, 995.57, 1036.57, 1066.55, 1070.61, 1089.61, 1109.53, 1133.68, 1179.63, 1234.67, 1252.64, 1265.66, 1267.70, 1277.70, 1307.68, 1308.67, 1319.71, 1320.64, 1323.71, 1365.66, 1424.71, 1434.76, 1475.76, 1515.73, 1519.70, 1522.66, 1536.74, 1590.74, 1604.80, 1611.89, 1620.81, 1687.82, 1703.84, 1716.81, 1754.92, 1759.87, 1791.83, 1796.96, 1838.87, 1886.90, 1950.90, 1955.85, 2198.89, 2214.88, 2252.97

8. [gi|16768768](#) Mass: 36749 Score: 43 Expect: 2.3 Queries matched: 10

LD02462p [Drosophila melanogaster]

| Observed | Mr(expt) | Mr(calc) | ppm    | Start | End | Miss | Peptide |                                    |
|----------|----------|----------|--------|-------|-----|------|---------|------------------------------------|
| 842.51   | 841.50   | 841.51   | -8.79  | 1     | -   | 8    | 0       | -.MPLAGILK.R                       |
| 1005.59  | 1004.58  | 1004.53  | 52.2   | 85    | -   | 93   | 0       | K.LTHTFTSAK.M                      |
| 1106.65  | 1105.65  | 1105.61  | 30.7   | 43    | -   | 51   | 1       | K.TVLIRDFDK.F                      |
| 1374.64  | 1373.63  | 1373.58  | 32.0   | 219   | -   | 229  | 0       | R.NDFMDTLIDMK.Q + 2 Oxidation (M)  |
| 1381.66  | 1380.66  | 1380.71  | -37.31 | 203   | -   | 213  | 1       | K.IVQDTIDYRMK.R                    |
| 1397.69  | 1396.69  | 1396.70  | -10.42 | 203   | -   | 213  | 1       | K.IVQDTIDYRMK.R + Oxidation (M)    |
| 1493.74  | 1492.74  | 1492.75  | -11.30 | 284   | -   | 296  | 1       | R.AEIDSVLERYNGK.L                  |
| 1641.83  | 1640.82  | 1640.87  | -31.39 | 169   | -   | 182  | 0       | R.HGWLVDLLIFGMPK.L + Oxidation (M) |
| 1656.90  | 1655.89  | 1655.81  | 47.9   | 154   | -   | 167  | 1       | K.AEFVQMGYSALRER.R                 |
| 1707.74  | 1706.74  | 1706.83  | -56.69 | 199   | -   | 211  | 1       | K.FYMKIVQDTIDYR.M + Oxidation (M)  |

**No match to:** 807.46, 829.41, 913.46, 967.49, 973.54, 995.57, 1036.57, 1066.55, 1070.61, 1089.61, 1109.53, 1133.68, 1179.63, 1234.67, 1252.64, 1265.66, 1267.70, 1277.70, 1307.68, 1308.67, 1319.71, 1320.64, 1323.71, 1365.66, 1383.69, 1424.71, 1434.76, 1475.76, 1515.73, 1519.70, 1522.66, 1536.74, 1590.74, 1604.80, 1611.89, 1620.81, 1687.82, 1703.84, 1716.81, 1754.92, 1759.87, 1791.83, 1796.96, 1838.87, 1886.90, 1950.90, 1955.85, 2198.89, 2214.88, 2252.97

9. [gi|24649395](#) Mass: 43739 Score: 42 Expect: 2.9 Queries matched: 8

Rpn9 CG10230-PA, isoform A [Drosophila melanogaster]

| Observed | Mr(expt) | Mr(calc) | ppm  | Start | End | Miss | Peptide |               |
|----------|----------|----------|------|-------|-----|------|---------|---------------|
| 1106.65  | 1105.65  | 1105.60  | 40.9 | 96    | -   | 104  | 1       | K.KEAIEFLEK.M |

|         |         |         |        |     |   |     |   |                                                       |
|---------|---------|---------|--------|-----|---|-----|---|-------------------------------------------------------|
| 1323.71 | 1322.70 | 1322.67 | 20.3   | 295 | - | 306 | 0 | R.AISFTDIAQETK.L                                      |
| 1374.64 | 1373.63 | 1373.70 | -50.24 | 371 | - | 382 | 1 | K.LMENRAAEILTN.-                                      |
| 1515.73 | 1514.72 | 1514.75 | -23.36 | 277 | - | 288 | 0 | K.ISLLCLMEMTFK.R + Oxidation (M); Propionamide (C)    |
| 1687.82 | 1686.81 | 1686.85 | -25.32 | 277 | - | 289 | 1 | K.ISLLCLMEMTFKR.S + 2 Oxidation (M); Propionamide (C) |
| 1716.81 | 1715.80 | 1715.87 | -39.02 | 275 | - | 288 | 1 | R.QKISLLCLMEMTFK.R + 2 Oxidation (M)                  |
| 1759.87 | 1758.86 | 1758.93 | -35.55 | 2   | - | 17  | 1 | M.SNPQPNVTAYLATQKK.T                                  |
| 1950.90 | 1949.89 | 1949.96 | -36.90 | 22  | - | 37  | 0 | K.ELAAEWTLIEELYNEK.L                                  |

**No match to:** 807.46, 829.41, 842.51, 913.46, 967.49, 973.54, 995.57, 1005.59, 1036.57, 1066.55, 1070.61, 1089.61, 1109.53, 1133.68, 1179.63, 1234.67, 1252.64, 1265.66, 1267.70, 1277.70, 1307.68, 1308.67, 1319.71, 1320.64, 1365.66, 1381.66, 1383.69, 1397.69, 1424.71, 1434.76, 1475.76, 1493.74, 1519.70, 1522.66, 1536.74, 1590.74, 1604.80, 1611.89, 1620.81, 1641.83, 1656.90, 1703.84, 1707.74, 1754.92, 1791.83, 1796.96, 1838.87, 1886.90, 1955.85, 2198.89, 2214.88, 2252.97

10. [gi|19920690](#) Mass: 97906 Score: 41 Expect: 4.1 Queries matched: 11

CG17840-PA [Drosophila melanogaster]

| Observed | Mr(expt) | Mr(calc) | ppm    | Start | End | Miss | Peptide |                                       |
|----------|----------|----------|--------|-------|-----|------|---------|---------------------------------------|
| 1036.57  | 1035.56  | 1035.53  | 25.0   | 457   | -   | 466  | 0       | R.TNSAQFAIGK.C                        |
| 1106.65  | 1105.65  | 1105.62  | 20.6   | 20    | -   | 28   | 1       | K.VVLYETRAR.L                         |
| 1109.53  | 1108.52  | 1108.46  | 49.1   | 448   | -   | 456  | 0       | R.TNCVDCCLDR.T + Propionamide (C)     |
| 1381.66  | 1380.66  | 1380.73  | -54.05 | 384   | -   | 394  | 0       | R.YLNQFLPPPHR.M                       |
| 1397.69  | 1396.69  | 1396.68  | 6.63   | 397   | -   | 407  | 1       | K.HIHFDMARQSR.L                       |
| 1475.76  | 1474.75  | 1474.72  | 18.9   | 825   | -   | 836  | 1       | K.SLTIYAEYCRTR.S                      |
| 1611.89  | 1610.88  | 1610.78  | 63.7   | 605   | -   | 619  | 1       | R.ACLPYSCADSNKLVK.E                   |
| 1641.83  | 1640.82  | 1640.88  | -35.77 | 467   | -   | 480  | 1       | K.CALGHQLERLGFVK.S + Propionamide (C) |
| 1656.90  | 1655.89  | 1655.86  | 16.7   | 384   | -   | 396  | 1       | R.YLNQFLPPPHRMK.H + Oxidation (M)     |
| 1703.84  | 1702.83  | 1702.89  | -32.08 | 370   | -   | 383  | 1       | K.HESIISKELEYSIR.Y                    |
| 1791.83  | 1790.83  | 1790.86  | -17.07 | 662   | -   | 675  | 1       | R.YMPTFRTNFSPFQR.Q                    |

**No match to:** 807.46, 829.41, 842.51, 913.46, 967.49, 973.54, 995.57, 1005.59, 1066.55, 1070.61, 1089.61, 1109.53, 1133.68, 1179.63, 1234.67, 1252.64, 1265.66, 1267.70, 1277.70, 1307.68, 1308.67, 1319.71, 1320.64, 1323.71, 1365.66, 1374.64, 1383.69, 1424.71, 1434.76, 1493.74, 1515.73, 1519.70, 1522.66, 1536.74, 1590.74, 1604.80, 1620.81, 1687.82, 1707.74, 1716.81, 1754.92, 1759.87, 1796.96, 1838.87, 1886.90, 1950.90, 1955.85, 2198.89, 2214.88, 2252.97

11. [gi|125977986](#) Mass: 120600 Score: 40 Expect: 4.7 Queries matched: 13

GA20622-PA [Drosophila pseudoobscura]

| Observed | Mr(expt) | Mr(calc) | ppm    | Start | End | Miss | Peptide |                                     |
|----------|----------|----------|--------|-------|-----|------|---------|-------------------------------------|
| 973.54   | 972.53   | 972.52   | 9.59   | 817   | -   | 825  | 0       | R.QAEIVAQSK.K                       |
| 1265.66  | 1264.65  | 1264.59  | 45.8   | 128   | -   | 139  | 1       | K.IKFGDDGEADK.T                     |
| 1267.70  | 1266.69  | 1266.64  | 42.3   | 739   | -   | 748  | 1       | K.RIDYGDPLR.D                       |
| 1307.68  | 1306.67  | 1306.68  | -5.31  | 782   | -   | 793  | 1       | R.YMAQGGRGKPKV.K + Oxidation (M)    |
| 1319.71  | 1318.71  | 1318.70  | 5.24   | 389   | -   | 399  | 0       | K.EQMLLTMLVNK.L                     |
| 1320.64  | 1319.63  | 1319.71  | -55.87 | 490   | -   | 500  | 1       | R.TMQAILRCLQK.A + Oxidation (M)     |
| 1365.66  | 1364.65  | 1364.67  | -12.90 | 1012  | -   | 1024 | 1       | K.GQGTSNAVFNKDK.S                   |
| 1424.71  | 1423.70  | 1423.61  | 62.0   | 60    | -   | 71   | 0       | R.ITFDDGGEVEER.K                    |
| 1536.74  | 1535.73  | 1535.73  | 2.04   | 212   | -   | 223  | 0       | K.DNEQLELFLNCK.N + Propionamide (C) |
| 1716.81  | 1715.80  | 1715.89  | -55.42 | 632   | -   | 648  | 0       | R.QELIGGIGATDEVSSLK.T               |
| 1759.87  | 1758.86  | 1758.92  | -29.17 | 20    | -   | 35   | 1       | K.IVFDDAGEAVEKPNKK.E                |
| 1791.83  | 1790.83  | 1790.81  | 8.13   | 97    | -   | 111  | 1       | K.FGDDGVEEQPWKK.N                   |
| 1796.96  | 1795.96  | 1795.86  | 54.7   | 337   | -   | 349  | 1       | R.RIYSYWFENEVK.D                    |

**No match to:** 807.46, 829.41, 842.51, 913.46, 967.49, 995.57, 1005.59, 1036.57, 1066.55, 1070.61, 1089.61, 1106.65, 1109.53, 1133.68, 1179.63, 1234.67, 1252.64, 1265.66, 1267.70, 1277.70, 1308.67, 1323.71, 1374.64, 1381.66, 1383.69, 1397.69, 1434.76, 1475.76, 1493.74, 1515.73, 1519.70, 1522.66, 1590.74, 1604.80, 1611.89, 1620.81, 1641.83, 1656.90, 1687.82, 1703.84, 1707.74, 1754.92, 1838.87, 1886.90, 1950.90, 1955.85, 2198.89, 2214.88, 2252.97

12. [gi|6649053](#) Mass: 64394 Score: 40 Expect: 5.1 Queries matched: 10

dynein [Drosophila mauritiana]

| Observed | Mr(expt) | Mr(calc) | ppm    | Start | End | Miss | Peptide |                                     |
|----------|----------|----------|--------|-------|-----|------|---------|-------------------------------------|
| 807.46   | 806.45   | 806.41   | 55.6   | 57    | -   | 62   | 1       | K.MRDTLR.D + Oxidation (M)          |
| 829.41   | 828.40   | 828.37   | 43.1   | 6     | -   | 12   | 0       | K.LYDSMGK.L + Oxidation (M)         |
| 913.46   | 912.45   | 912.49   | -46.74 | 350   | -   | 357  | 0       | R.AELPENLK.A                        |
| 1005.59  | 1004.58  | 1004.53  | 48.9   | 311   | -   | 319  | 1       | K.CIQDAIKSK.K                       |
| 1308.67  | 1307.66  | 1307.65  | 4.79   | 2     | -   | 12   | 1       | R.HLTKLYDSMGK.L + Oxidation (M)     |
| 1381.66  | 1380.66  | 1380.73  | -51.13 | 543   | -   | 553  | 1       | K.RKPHYNDLNP.K.A                    |
| 1475.76  | 1474.75  | 1474.73  | 14.4   | 554   | -   | 567  | 0       | K.AVTNDELFGIVNPS.-                  |
| 1611.89  | 1610.88  | 1610.87  | 9.19   | 433   | -   | 445  | 1       | R.QRPEDQVLMRALR.D                   |
| 1641.83  | 1640.82  | 1640.84  | -12.77 | 6     | -   | 20   | 1       | K.LYDSMGKLNLISSGK.N + Oxidation (M) |
| 1759.87  | 1758.86  | 1758.87  | -2.86  | 402   | -   | 415  | 1       | K.ELLSKQDHYDWGLR.A                  |

**No match to:** 842.51, 967.49, 973.54, 995.57, 1036.57, 1066.55, 1070.61, 1089.61, 1106.65, 1109.53, 1133.68, 1179.63, 1234.67, 1252.64, 1265.66, 1267.70, 1277.70, 1307.68, 1319.71, 1320.64, 1323.71, 1365.66, 1374.64,

1383.69, 1397.69, 1424.71, 1434.76, 1493.74, 1515.73, 1519.70, 1522.66, 1536.74, 1590.74, 1604.80, 1620.81, 1656.90, 1687.82, 1703.84, 1707.74, 1716.81, 1754.92, 1791.83, 1796.96, 1838.87, 1886.90, 1950.90, 1955.85, 2198.89, 2214.88, 2252.97

13. [gi|6649055](#) Mass: 64364 Score: 40 Expect: 5.1 Queries matched: 10

dynein [Drosophila yakuba]

| Observed                                                                                                                                                                                                                                                                                                                                                                                                                                                                         | Mr(expt) | Mr(calc) | ppm    | Start | End | Miss | Peptide                              |
|----------------------------------------------------------------------------------------------------------------------------------------------------------------------------------------------------------------------------------------------------------------------------------------------------------------------------------------------------------------------------------------------------------------------------------------------------------------------------------|----------|----------|--------|-------|-----|------|--------------------------------------|
| 807.46                                                                                                                                                                                                                                                                                                                                                                                                                                                                           | 806.45   | 806.41   | 55.6   | 57    | 62  | 1    | K.MRDTLR.D + Oxidation (M)           |
| 829.41                                                                                                                                                                                                                                                                                                                                                                                                                                                                           | 828.40   | 828.37   | 43.1   | 6     | 12  | 0    | K.LYDSMGK.L + Oxidation (M)          |
| 913.46                                                                                                                                                                                                                                                                                                                                                                                                                                                                           | 912.45   | 912.49   | -46.74 | 350   | 357 | 0    | R.AELPENLK.A                         |
| 1005.59                                                                                                                                                                                                                                                                                                                                                                                                                                                                          | 1004.58  | 1004.53  | 48.9   | 311   | 319 | 1    | K.CIQDAIKSK.K                        |
| 1308.67                                                                                                                                                                                                                                                                                                                                                                                                                                                                          | 1307.66  | 1307.65  | 4.79   | 2     | 12  | 1    | R.HLTKLYDSMGK.L + Oxidation (M)      |
| 1381.66                                                                                                                                                                                                                                                                                                                                                                                                                                                                          | 1380.66  | 1380.73  | -51.13 | 543   | 553 | 1    | K.RKPHYNDLNP.K.A                     |
| 1475.76                                                                                                                                                                                                                                                                                                                                                                                                                                                                          | 1474.75  | 1474.73  | 14.4   | 554   | 567 | 0    | K.AVTNDELFGIVNPS.-                   |
| 1611.89                                                                                                                                                                                                                                                                                                                                                                                                                                                                          | 1610.88  | 1610.87  | 9.19   | 433   | 445 | 1    | R.QRPEDQVLMRALR.D                    |
| 1641.83                                                                                                                                                                                                                                                                                                                                                                                                                                                                          | 1640.82  | 1640.84  | -12.77 | 6     | 20  | 1    | K.LYDSMGKLNLI.SGSK.N + Oxidation (M) |
| 1759.87                                                                                                                                                                                                                                                                                                                                                                                                                                                                          | 1758.86  | 1758.87  | -2.86  | 402   | 415 | 1    | K.ELLSKQDHYDWGLR.A                   |
| <b>No match to:</b> 842.51, 967.49, 973.54, 995.57, 1036.57, 1066.55, 1070.61, 1089.61, 1106.65, 1109.53, 1133.68, 1179.63, 1234.67, 1252.64, 1265.66, 1267.70, 1277.70, 1307.68, 1319.71, 1320.64, 1323.71, 1365.66, 1374.64, 1383.69, 1397.69, 1424.71, 1434.76, 1493.74, 1515.73, 1519.70, 1522.66, 1536.74, 1590.74, 1604.80, 1620.81, 1656.90, 1687.82, 1703.84, 1707.74, 1716.81, 1754.92, 1791.83, 1796.96, 1838.87, 1886.90, 1950.90, 1955.85, 2198.89, 2214.88, 2252.97 |          |          |        |       |     |      |                                      |

14. [gi|58613897](#) Mass: 39244 Score: 39 Expect: 5.9 Queries matched: 7

SR-CIV [Drosophila simulans]

| Observed                                                                                                                                                                                                                                                                                                                                                                                                                                                                                                 | Mr(expt) | Mr(calc) | ppm    | Start | End | Miss | Peptide                           |
|----------------------------------------------------------------------------------------------------------------------------------------------------------------------------------------------------------------------------------------------------------------------------------------------------------------------------------------------------------------------------------------------------------------------------------------------------------------------------------------------------------|----------|----------|--------|-------|-----|------|-----------------------------------|
| 1179.63                                                                                                                                                                                                                                                                                                                                                                                                                                                                                                  | 1178.62  | 1178.55  | 56.0   | 243   | 252 | 1    | K.LMTAEECARR.S                    |
| 1234.67                                                                                                                                                                                                                                                                                                                                                                                                                                                                                                  | 1233.66  | 1233.63  | 23.7   | 53    | 62  | 1    | K.VFTCDRGIPR.G + Propionamide (C) |
| 1323.71                                                                                                                                                                                                                                                                                                                                                                                                                                                                                                  | 1322.70  | 1322.64  | 47.8   | 231   | 242 | 0    | R.SQYGDIAIDDK.L                   |
| 1703.84                                                                                                                                                                                                                                                                                                                                                                                                                                                                                                  | 1702.83  | 1702.74  | 52.6   | 114   | 127 | 0    | K.DHTFQNSQDGHYVR.M                |
| 1754.92                                                                                                                                                                                                                                                                                                                                                                                                                                                                                                  | 1753.91  | 1753.86  | 28.8   | 83    | 97  | 1    | K.CGWTAELSFLGTWKR.V               |
| 1886.90                                                                                                                                                                                                                                                                                                                                                                                                                                                                                                  | 1885.89  | 1885.85  | 22.7   | 215   | 230 | 0    | K.QMDEDFQVIFTATDAR.S              |
| 2214.88                                                                                                                                                                                                                                                                                                                                                                                                                                                                                                  | 2213.87  | 2214.02  | -66.22 | 109   | 127 | 1    | K.TGPQKDHQNSQDGHYVR.M             |
| <b>No match to:</b> 807.46, 829.41, 842.51, 913.46, 967.49, 973.54, 995.57, 1005.59, 1036.57, 1066.55, 1070.61, 1089.61, 1106.65, 1109.53, 1133.68, 1252.64, 1265.66, 1267.70, 1277.70, 1307.68, 1308.67, 1319.71, 1320.64, 1365.66, 1374.64, 1381.66, 1383.69, 1397.69, 1424.71, 1434.76, 1475.76, 1493.74, 1515.73, 1519.70, 1522.66, 1536.74, 1590.74, 1604.80, 1620.81, 1656.90, 1687.82, 1703.84, 1707.74, 1716.81, 1754.92, 1791.83, 1796.96, 1838.87, 1886.90, 1950.90, 1955.85, 2198.89, 2252.97 |          |          |        |       |     |      |                                   |

15. [gi|6649009](#) Mass: 65715 Score: 39 Expect: 6 Queries matched: 10

dynein [Drosophila melanogaster]

| Observed                                                                                                                                                                                                                                                                                                                                                                                                                                                                         | Mr(expt) | Mr(calc) | ppm    | Start | End | Miss | Peptide                                            |
|----------------------------------------------------------------------------------------------------------------------------------------------------------------------------------------------------------------------------------------------------------------------------------------------------------------------------------------------------------------------------------------------------------------------------------------------------------------------------------|----------|----------|--------|-------|-----|------|----------------------------------------------------|
| 807.46                                                                                                                                                                                                                                                                                                                                                                                                                                                                           | 806.45   | 806.41   | 55.6   | 62    | 67  | 1    | K.MRDTLR.D + Oxidation (M)                         |
| 829.41                                                                                                                                                                                                                                                                                                                                                                                                                                                                           | 828.40   | 828.37   | 43.1   | 11    | 17  | 0    | K.LYDSMGK.L + Oxidation (M)                        |
| 913.46                                                                                                                                                                                                                                                                                                                                                                                                                                                                           | 912.45   | 912.49   | -46.74 | 355   | 362 | 0    | R.AELPENLK.A                                       |
| 1005.59                                                                                                                                                                                                                                                                                                                                                                                                                                                                          | 1004.58  | 1004.53  | 48.9   | 316   | 324 | 1    | K.CIQDAIKSK.K                                      |
| 1308.67                                                                                                                                                                                                                                                                                                                                                                                                                                                                          | 1307.66  | 1307.65  | 4.79   | 7     | 17  | 1    | R.HLTKLYDSMGK.L + Oxidation (M)                    |
| 1381.66                                                                                                                                                                                                                                                                                                                                                                                                                                                                          | 1380.66  | 1380.73  | -51.13 | 548   | 558 | 1    | K.RKPHYNDLNP.K.A                                   |
| 1475.76                                                                                                                                                                                                                                                                                                                                                                                                                                                                          | 1474.75  | 1474.73  | 16.6   | 151   | 162 | 0    | K.IMTICTIDVHSR.D + Oxidation (M); Propionamide (C) |
| 1611.89                                                                                                                                                                                                                                                                                                                                                                                                                                                                          | 1610.88  | 1610.87  | 9.19   | 438   | 450 | 1    | R.QRPEDQVLMRALR.D                                  |
| 1641.83                                                                                                                                                                                                                                                                                                                                                                                                                                                                          | 1640.82  | 1640.84  | -12.77 | 11    | 25  | 1    | K.LYDSMGKLNLI.SGSK.N + Oxidation (M)               |
| 1759.87                                                                                                                                                                                                                                                                                                                                                                                                                                                                          | 1758.86  | 1758.87  | -2.86  | 407   | 420 | 1    | K.ELLSKQDHYDWGLR.A                                 |
| <b>No match to:</b> 842.51, 967.49, 973.54, 995.57, 1036.57, 1066.55, 1070.61, 1089.61, 1106.65, 1109.53, 1133.68, 1179.63, 1234.67, 1252.64, 1265.66, 1267.70, 1277.70, 1307.68, 1319.71, 1320.64, 1323.71, 1365.66, 1374.64, 1383.69, 1397.69, 1424.71, 1434.76, 1493.74, 1515.73, 1519.70, 1522.66, 1536.74, 1590.74, 1604.80, 1620.81, 1656.90, 1687.82, 1703.84, 1707.74, 1716.81, 1754.92, 1791.83, 1796.96, 1838.87, 1886.90, 1950.90, 1955.85, 2198.89, 2214.88, 2252.97 |          |          |        |       |     |      |                                                    |

16. [gi|6649051](#) Mass: 64846 Score: 38 Expect: 7.2 Queries matched: 10

dynein [Drosophila sechellia]

| Observed | Mr(expt) | Mr(calc) | ppm    | Start | End | Miss | Peptide                              |
|----------|----------|----------|--------|-------|-----|------|--------------------------------------|
| 807.46   | 806.45   | 806.41   | 55.6   | 62    | 67  | 1    | K.MRDTLR.D + Oxidation (M)           |
| 829.41   | 828.40   | 828.37   | 43.1   | 11    | 17  | 0    | K.LYDSMGK.L + Oxidation (M)          |
| 913.46   | 912.45   | 912.49   | -46.74 | 355   | 362 | 0    | R.AELPENLK.A                         |
| 1005.59  | 1004.58  | 1004.53  | 48.9   | 316   | 324 | 1    | K.CIQDAIKSK.K                        |
| 1308.67  | 1307.66  | 1307.65  | 4.79   | 7     | 17  | 1    | R.HLTKLYDSMGK.L + Oxidation (M)      |
| 1381.66  | 1380.66  | 1380.73  | -51.13 | 548   | 558 | 1    | K.RKPHYNDLNP.K.A                     |
| 1475.76  | 1474.75  | 1474.73  | 14.4   | 559   | 572 | 0    | K.AVTNDELFGIVNPS.-                   |
| 1611.89  | 1610.88  | 1610.87  | 9.19   | 438   | 450 | 1    | R.QRPEDQVLMRALR.D                    |
| 1641.83  | 1640.82  | 1640.84  | -12.77 | 11    | 25  | 1    | K.LYDSMGKLNLI.SGSK.N + Oxidation (M) |
| 1759.87  | 1758.86  | 1758.87  | -2.86  | 407   | 420 | 1    | K.ELLSKQDHYDWGLR.A                   |

**No match to:** 842.51, 967.49, 973.54, 995.57, 1036.57, 1066.55, 1070.61, 1089.61, 1106.65, 1109.53, 1133.68, 1179.63, 1234.67, 1252.64, 1265.66, 1267.70, 1277.70, 1307.68, 1319.71, 1320.64, 1323.71, 1365.66, 1374.64, 1383.69, 1397.69, 1424.71, 1434.76, 1493.74, 1515.73, 1519.70, 1522.66, 1536.74, 1590.74, 1604.80, 1620.81, 1656.90, 1687.82, 1703.84, 1707.74, 1716.81, 1754.92, 1791.83, 1796.96, 1838.87, 1886.90, 1950.90, 1955.85, 2198.89, 2214.88, 2252.97

17. [gi|24581132](#) Mass: 42670 Score: 38 Expect: 7.6 Queries matched: 8

CG31948-PB, isoform B [Drosophila melanogaster]

| Observed | Mr(expt) | Mr(calc) | ppm    | Start | End | Miss | Peptide                                                  |
|----------|----------|----------|--------|-------|-----|------|----------------------------------------------------------|
| 1252.64  | 1251.64  | 1251.65  | -12.66 | 56    | 65  | 1    | K.DEYLLCKVAK.K + Propionamide (C)                        |
| 1319.71  | 1318.71  | 1318.73  | -19.82 | 275   | 285 | 0    | R.SIFVIPMIVER.R + Oxidation (M)                          |
| 1434.76  | 1433.76  | 1433.70  | 41.9   | 345   | 355 | 1    | K.EYIENHCSKIK.Y + Propionamide (C)                       |
| 1475.76  | 1474.75  | 1474.83  | -55.16 | 275   | 286 | 1    | R.SIFVIPMIVERR.L + Oxidation (M)                         |
| 1536.74  | 1535.73  | 1535.79  | -38.93 | 263   | 274 | 1    | R.CTSFIKHFIDLVR.S + Propionamide (C)                     |
| 1703.84  | 1702.83  | 1702.86  | -17.44 | 49    | 62  | 1    | R.FFDAVLKDEYLLCK.V                                       |
| 1955.85  | 1954.84  | 1954.96  | -58.31 | 253   | 268 | 1    | R.VARPMCPYPYRCTSFYIK.H + Oxidation (M); Propionamide (C) |
| 2252.97  | 2251.96  | 2251.94  | 7.60   | 167   | 185 | 1    | K.CCDGEDNRPPYARIMPEDR.R + Oxidation (M)                  |

**No match to:** 807.46, 829.41, 842.51, 913.46, 967.49, 973.54, 995.57, 1005.59, 1036.57, 1066.55, 1070.61, 1089.61, 1106.65, 1109.53, 1133.68, 1179.63, 1234.67, 1265.66, 1267.70, 1277.70, 1307.68, 1308.67, 1320.64, 1323.71, 1365.66, 1374.64, 1381.66, 1383.69, 1397.69, 1424.71, 1493.74, 1515.73, 1519.70, 1522.66, 1590.74, 1604.80, 1611.89, 1620.81, 1641.83, 1656.90, 1687.82, 1707.74, 1716.81, 1754.92, 1759.87, 1791.83, 1796.96, 1838.87, 1886.90, 1950.90, 2198.89, 2214.88

18. [gi|24641704](#) Mass: 170230 Score: 38 Expect: 7.8 Queries matched: 15

strawberry notch CG1903-PB, isoform B [Drosophila melanogaster]

| Observed | Mr(expt) | Mr(calc) | ppm    | Start | End  | Miss | Peptide                              |
|----------|----------|----------|--------|-------|------|------|--------------------------------------|
| 995.57   | 994.56   | 994.54   | 24.9   | 612   | 619  | 1    | K.LRGMYYIAR.Q + Oxidation (M)        |
| 1109.53  | 1108.52  | 1108.55  | -30.72 | 753   | 761  | 1    | R.HFPAPDRNR.I                        |
| 1320.64  | 1319.63  | 1319.63  | 4.88   | 468   | 478  | 1    | K.ISSDVNNCKR.G + Propionamide (C)    |
| 1323.71  | 1322.70  | 1322.68  | 16.8   | 1191  | 1201 | 1    | K.YGRQALETVMR.T                      |
| 1383.69  | 1382.68  | 1382.69  | -10.14 | 1250  | 1260 | 1    | K.DYNNISKFLNR.I                      |
| 1397.69  | 1396.69  | 1396.64  | 37.0   | 731   | 743  | 0    | R.DDGELTDFVSTAK.G                    |
| 1424.71  | 1423.70  | 1423.75  | -38.34 | 1163  | 1175 | 1    | R.LESLGALTHGDRR.A                    |
| 1522.66  | 1521.65  | 1521.74  | -56.70 | 1319  | 1332 | 0    | K.HATGVAPTEMHTVR.V + Oxidation (M)   |
| 1536.74  | 1535.73  | 1535.81  | -50.48 | 1111  | 1123 | 0    | R.VHITLELPWSADR.A                    |
| 1590.74  | 1589.73  | 1589.79  | -35.83 | 1333  | 1345 | 1    | R.VERGMIWQEAIK.Y + Oxidation (M)     |
| 1620.81  | 1619.80  | 1619.82  | -9.99  | 599   | 613  | 1    | R.GVGAMEIVAMDMKLR.G                  |
| 1656.90  | 1655.89  | 1655.91  | -16.04 | 1478  | 1492 | 0    | R.LYHVLGSLVSVWGR.V                   |
| 1796.96  | 1795.96  | 1795.89  | 37.0   | 182   | 198  | 0    | K.LNMVTVSYAGGASQIR.A + Oxidation (M) |
| 1838.87  | 1837.86  | 1837.89  | -18.23 | 642   | 656  | 0    | K.IYDQSVLWVEAMQK.F                   |
| 2252.97  | 2251.96  | 2252.08  | -54.56 | 724   | 743  | 1    | R.TLDQLERDDGELTDFVSTAK.G             |

**No match to:** 807.46, 829.41, 842.51, 913.46, 967.49, 973.54, 1005.59, 1036.57, 1066.55, 1070.61, 1089.61, 1106.65, 1133.68, 1179.63, 1234.67, 1252.64, 1265.66, 1267.70, 1277.70, 1307.68, 1308.67, 1319.71, 1365.66, 1374.64, 1381.66, 1434.76, 1475.76, 1493.74, 1515.73, 1519.70, 1604.80, 1611.89, 1641.83, 1687.82, 1703.84, 1707.74, 1716.81, 1754.92, 1759.87, 1791.83, 1886.90, 1950.90, 1955.85, 2198.89, 2214.88

19. [gi|2078282](#) Mass: 170361 Score: 38 Expect: 8.3 Queries matched: 15

Sno [Drosophila melanogaster]

| Observed | Mr(expt) | Mr(calc) | ppm    | Start | End  | Miss | Peptide                              |
|----------|----------|----------|--------|-------|------|------|--------------------------------------|
| 995.57   | 994.56   | 994.54   | 24.9   | 612   | 619  | 1    | K.LRGMYYIAR.Q + Oxidation (M)        |
| 1109.53  | 1108.52  | 1108.55  | -30.72 | 753   | 761  | 1    | R.HFPAPDRNR.I                        |
| 1320.64  | 1319.63  | 1319.63  | 4.88   | 468   | 478  | 1    | K.ISSDVNNCKR.G + Propionamide (C)    |
| 1323.71  | 1322.70  | 1322.68  | 16.8   | 1191  | 1201 | 1    | K.YGRQALETVMR.T                      |
| 1383.69  | 1382.68  | 1382.69  | -10.14 | 1250  | 1260 | 1    | K.DYNNISKFLNR.I                      |
| 1397.69  | 1396.69  | 1396.64  | 37.0   | 731   | 743  | 0    | R.DDGELTDFVSTAK.G                    |
| 1424.71  | 1423.70  | 1423.75  | -38.34 | 1163  | 1175 | 1    | R.LESLGALTHGDRR.A                    |
| 1522.66  | 1521.65  | 1521.74  | -56.70 | 1319  | 1332 | 0    | K.HATGVAPTEMHTVR.V + Oxidation (M)   |
| 1536.74  | 1535.73  | 1535.81  | -50.48 | 1111  | 1123 | 0    | R.VHITLELPWSADR.A                    |
| 1590.74  | 1589.73  | 1589.79  | -35.83 | 1333  | 1345 | 1    | R.VERGMIWQEAIK.Y + Oxidation (M)     |
| 1620.81  | 1619.80  | 1619.82  | -9.99  | 599   | 613  | 1    | R.GVGAMEIVAMDMKLR.G                  |
| 1656.90  | 1655.89  | 1655.91  | -16.04 | 1478  | 1492 | 0    | R.LYHVLGSLVSVWGR.V                   |
| 1796.96  | 1795.96  | 1795.89  | 37.0   | 182   | 198  | 0    | K.LNMVTVSYAGGASQIR.A + Oxidation (M) |
| 1838.87  | 1837.86  | 1837.89  | -18.23 | 642   | 656  | 0    | K.IYDQSVLWVEAMQK.F                   |
| 2252.97  | 2251.96  | 2252.08  | -54.56 | 724   | 743  | 1    | R.TLDQLERDDGELTDFVSTAK.G             |

**No match to:** 807.46, 829.41, 842.51, 913.46, 967.49, 973.54, 1005.59, 1036.57, 1066.55, 1070.61, 1089.61, 1106.65, 1133.68, 1179.63, 1234.67, 1252.64, 1265.66, 1267.70, 1277.70, 1307.68, 1308.67, 1319.71, 1365.66, 1374.64, 1381.66, 1434.76, 1475.76, 1493.74, 1515.73, 1519.70, 1604.80, 1611.89, 1641.83, 1687.82, 1703.84, 1707.74, 1716.81, 1754.92, 1759.87, 1791.83, 1886.90, 1950.90, 1955.85, 2198.89, 2214.88

20. [gi|24658169](#) Mass: 79930 Score: 36 Expect: 12 Queries matched: 10

CG4611-PA [Drosophila melanogaster]

| Observed                                                                                                                                                                                                                                                                                                                                                                                                                                                                       | Mr(expt) | Mr(calc) | ppm    | Start | End   | Miss | Peptide                                                   |
|--------------------------------------------------------------------------------------------------------------------------------------------------------------------------------------------------------------------------------------------------------------------------------------------------------------------------------------------------------------------------------------------------------------------------------------------------------------------------------|----------|----------|--------|-------|-------|------|-----------------------------------------------------------|
| 807.46                                                                                                                                                                                                                                                                                                                                                                                                                                                                         | 806.45   | 806.40   | 69.5   | 174   | - 179 | 1    | R.MLKEDR.A + Oxidation (M)                                |
| 1308.67                                                                                                                                                                                                                                                                                                                                                                                                                                                                        | 1307.66  | 1307.71  | -39.69 | 483   | - 493 | 0    | K.ADIDFFNLIK.K                                            |
| 1383.69                                                                                                                                                                                                                                                                                                                                                                                                                                                                        | 1382.68  | 1382.72  | -30.77 | 538   | - 549 | 0    | R.ELLEQMHVAGIK.M + Oxidation (M)                          |
| 1475.76                                                                                                                                                                                                                                                                                                                                                                                                                                                                        | 1474.75  | 1474.76  | -2.61  | 75    | - 87  | 0    | R.EEVFEELITAAPK.E                                         |
| 1519.70                                                                                                                                                                                                                                                                                                                                                                                                                                                                        | 1518.70  | 1518.79  | -59.95 | 313   | - 324 | 0    | R.HALLTWHNMLQR.G                                          |
| 1656.90                                                                                                                                                                                                                                                                                                                                                                                                                                                                        | 1655.89  | 1655.80  | 54.7   | 253   | - 266 | 1    | K.GYEPNVKYNAMIK.A + Oxidation (M)                         |
| 1687.82                                                                                                                                                                                                                                                                                                                                                                                                                                                                        | 1686.81  | 1686.69  | 69.2   | 339   | - 352 | 1    | R.CARDCGFGDLDSMR.E + 2 Propionamide (C)                   |
| 1759.87                                                                                                                                                                                                                                                                                                                                                                                                                                                                        | 1758.86  | 1758.86  | 1.22   | 9     | - 24  | 1    | R.SMSCHIRGLQLNATGR.R + Oxidation (M)                      |
| 1886.90                                                                                                                                                                                                                                                                                                                                                                                                                                                                        | 1885.89  | 1885.82  | 40.2   | 342   | - 357 | 1    | R.DCGFGDLDSMREVIDK.I + Oxidation (M); Propionamide (C)    |
| 1950.90                                                                                                                                                                                                                                                                                                                                                                                                                                                                        | 1949.89  | 1949.93  | -20.78 | 550   | - 566 | 1    | K.MNMPILGAMLRQGCANK.S + 2 Oxidation (M); Propionamide (C) |
| <b>No match to:</b> 829.41, 842.51, 913.46, 967.49, 973.54, 995.57, 1005.59, 1036.57, 1066.55, 1070.61, 1089.61, 1106.65, 1109.53, 1133.68, 1179.63, 1234.67, 1252.64, 1265.66, 1267.70, 1277.70, 1307.68, 1319.71, 1320.64, 1323.71, 1365.66, 1374.64, 1381.66, 1397.69, 1424.71, 1434.76, 1493.74, 1515.73, 1522.66, 1536.74, 1590.74, 1604.80, 1611.89, 1620.81, 1641.83, 1703.84, 1707.74, 1716.81, 1754.92, 1791.83, 1796.96, 1838.87, 1955.85, 2198.89, 2214.88, 2252.97 |          |          |        |       |       |      |                                                           |

## Search Parameters

Type of search : Peptide Mass Fingerprint  
 Enzyme : Trypsin  
 Variable modifications : Oxidation (M), Propionamide (C)  
 Mass values : Monoisotopic  
 Protein Mass : Unrestricted  
 Peptide Mass Tolerance :  $\pm 70$  ppm  
 Peptide Charge State : 1+  
 Max Missed Cleavages : 1  
 Number of queries : 60

Mascot: <http://www.matrixscience.com/>

# Mascot Search Results

**User** : Ilya  
**Email** : toropygin@rambler.ru  
**Search title** : Submitted from Shidlovsky 080324 II by Mascot Daemon on P4P800SE  
**MS data file** : \\192.168.0.18\data on ultraflex-2\DATA\2008\_Ilya\Shidlovsky\080325\005\0\_J15\1\005\_0\_J15\_1.dar  
**Database** : NCBIInr 20070307 (4984280 sequences; 1723577896 residues)  
**Taxonomy** : Drosophila (fruit flies) (47828 sequences)  
**Timestamp** : 3 Apr 2008 at 21:53:38 GMT  
**Top Score** : 140 for [gi|17137148](#), Origin recognition complex subunit 5 CG7833-PA [Drosophila melanogaster]

## Probability Based Mowse Score

Protein score is  $-10 \cdot \log(P)$ , where P is the probability that the observed match is a random event. Protein scores greater than 59 are significant ( $p < 0.05$ ).

Score Distribution

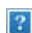

## Protein Summary Report

|                           |                      |
|---------------------------|----------------------|
| Protein Summary           | <a href="#">Help</a> |
| Significance threshold p< | Max. number of hits  |

## Overview Table

Click on column header to jump to entry in results list.  
 Move mouse over any indicator to highlight identical peptides.  
 Click on an indicator to see details of individual match.  
 Use check boxes to select sub-set of queries for new search.

Mouse over:

| Hit:                         | 1 | 2 | 3 | 4 | 5 | 6 | 7 | 8 | 9 | 10 | 11 | 12 | 13 | 14 | 15 | 16 | 17 | 18 | 19 | 20 |  |
|------------------------------|---|---|---|---|---|---|---|---|---|----|----|----|----|----|----|----|----|----|----|----|--|
| <a href="#">842.51</a> (1+)  |   |   |   |   |   |   |   |   |   |    |    |    |    |    |    |    |    |    |    |    |  |
| <a href="#">913.43</a> (1+)  |   |   |   |   |   |   |   |   |   |    |    |    |    |    |    |    |    |    |    |    |  |
| <a href="#">973.52</a> (1+)  |   |   |   |   |   |   |   |   |   |    |    |    |    |    |    |    |    |    |    |    |  |
| <a href="#">1082.55</a> (1+) |   |   |   |   |   |   |   |   |   |    |    |    |    |    |    |    |    |    |    |    |  |
| <a href="#">1098.56</a> (1+) |   |   |   |   |   |   |   |   |   |    |    |    |    |    |    |    |    |    |    |    |  |
| <a href="#">1141.61</a> (1+) |   |   |   |   |   |   |   |   |   |    |    |    |    |    |    |    |    |    |    |    |  |
| <a href="#">1162.61</a> (1+) |   |   |   |   |   |   |   |   |   |    |    |    |    |    |    |    |    |    |    |    |  |
| <a href="#">1173.58</a> (1+) |   |   |   |   |   |   |   |   |   |    |    |    |    |    |    |    |    |    |    |    |  |
| <a href="#">1179.59</a> (1+) |   |   |   |   |   |   |   |   |   |    |    |    |    |    |    |    |    |    |    |    |  |
| <a href="#">1333.67</a> (1+) |   |   |   |   |   |   |   |   |   |    |    |    |    |    |    |    |    |    |    |    |  |
| <a href="#">1395.75</a> (1+) |   |   |   |   |   |   |   |   |   |    |    |    |    |    |    |    |    |    |    |    |  |
| <a href="#">1461.77</a> (1+) |   |   |   |   |   |   |   |   |   |    |    |    |    |    |    |    |    |    |    |    |  |





| Observed                                                                                                                                                        | Mr(expt) | Mr(calc) | ppm    | Start | End   | Miss | Peptide                                   |
|-----------------------------------------------------------------------------------------------------------------------------------------------------------------|----------|----------|--------|-------|-------|------|-------------------------------------------|
| 1082.55                                                                                                                                                         | 1081.55  | 1081.53  | 12.6   | 442   | - 450 | 1    | R.DLRMGVYGR.Y + Oxidation (M)             |
| 1098.56                                                                                                                                                         | 1097.55  | 1097.48  | 57.9   | 765   | - 773 | 1    | R.TQCMNTEKK.F + Oxidation (M)             |
| 1179.59                                                                                                                                                         | 1178.58  | 1178.60  | -13.62 | 380   | - 388 | 1    | K.EIKCMICLR.R + Propionamide (C)          |
| 1634.86                                                                                                                                                         | 1633.85  | 1633.86  | -5.88  | 660   | - 673 | 1    | K.ICDIQFVSVADLRR.H                        |
| 1640.91                                                                                                                                                         | 1639.90  | 1639.79  | 63.7   | 851   | - 865 | 0    | K.YLCSLCGLESSTPNK.L                       |
| 1675.82                                                                                                                                                         | 1674.81  | 1674.78  | 23.5   | 365   | - 379 | 1    | R.VDGFDFHRSEPNQAK.E                       |
| 1795.79                                                                                                                                                         | 1794.78  | 1794.79  | -3.01  | 873   | - 887 | 1    | R.HTGEKPFKCDLDCMR.F + Oxidation (M)       |
| 2225.11                                                                                                                                                         | 2224.10  | 2223.96  | 62.5   | 82    | - 102 | 0    | K.IGDSLNGDDEMEGTAALECLR.E + Oxidation (M) |
| 2433.21                                                                                                                                                         | 2432.20  | 2432.33  | -53.71 | 28    | - 48  | 1    | K.TFVQLLVELTRIEVVMAQAEK.F + Oxidation (M) |
| <b>No match to:</b> 842.51, 913.43, 973.52, 1141.61, 1162.61, 1173.58, 1333.67, 1395.75, 1461.77, 1475.75, 1494.71, 1567.74, 1586.90, 1650.82, 2211.10, 2305.12 |          |          |        |       |       |      |                                           |

3. [gi|19528115](#) Mass: 108736 Score: 44 Expect: 2 Queries matched: 9

AT25429p [Drosophila melanogaster]

| Observed                                                                                                                                                        | Mr(expt) | Mr(calc) | ppm    | Start | End   | Miss | Peptide                                   |
|-----------------------------------------------------------------------------------------------------------------------------------------------------------------|----------|----------|--------|-------|-------|------|-------------------------------------------|
| 1082.55                                                                                                                                                         | 1081.55  | 1081.53  | 12.6   | 442   | - 450 | 1    | R.DLRMGVYGR.Y + Oxidation (M)             |
| 1098.56                                                                                                                                                         | 1097.55  | 1097.48  | 57.9   | 765   | - 773 | 1    | R.TQCMNTEKK.F + Oxidation (M)             |
| 1179.59                                                                                                                                                         | 1178.58  | 1178.60  | -13.62 | 380   | - 388 | 1    | K.EIKCMICLR.R + Propionamide (C)          |
| 1634.86                                                                                                                                                         | 1633.85  | 1633.86  | -5.88  | 660   | - 673 | 1    | K.ICDIQFVSVADLRR.H                        |
| 1640.91                                                                                                                                                         | 1639.90  | 1639.79  | 63.7   | 851   | - 865 | 0    | K.YLCSLCGLESSTPNK.L                       |
| 1675.82                                                                                                                                                         | 1674.81  | 1674.78  | 23.5   | 365   | - 379 | 1    | R.VDGFDFHRSEPNQAK.E                       |
| 1795.79                                                                                                                                                         | 1794.78  | 1794.79  | -3.01  | 873   | - 887 | 1    | R.HTGEKPFKCDLDCMR.F + Oxidation (M)       |
| 2225.11                                                                                                                                                         | 2224.10  | 2223.96  | 62.5   | 82    | - 102 | 0    | K.IGDSLNGDDEMEGTAALECLR.E + Oxidation (M) |
| 2433.21                                                                                                                                                         | 2432.20  | 2432.33  | -53.71 | 28    | - 48  | 1    | K.TFVQLLVELTRIEVVMAQAEK.F + Oxidation (M) |
| <b>No match to:</b> 842.51, 913.43, 973.52, 1141.61, 1162.61, 1173.58, 1333.67, 1395.75, 1461.77, 1475.75, 1494.71, 1567.74, 1586.90, 1650.82, 2211.10, 2305.12 |          |          |        |       |       |      |                                           |

4. [gi|125776637](#) Mass: 45640 Score: 42 Expect: 2.8 Queries matched: 6

GA18345-PA [Drosophila pseudoobscura]

| Observed                                                                                                                                                                                    | Mr(expt) | Mr(calc) | ppm    | Start | End   | Miss | Peptide                           |
|---------------------------------------------------------------------------------------------------------------------------------------------------------------------------------------------|----------|----------|--------|-------|-------|------|-----------------------------------|
| 842.51                                                                                                                                                                                      | 841.50   | 841.50   | 0.00   | 17    | - 23  | 1    | K.RIEISPK.S                       |
| 1082.55                                                                                                                                                                                     | 1081.55  | 1081.55  | -0.28  | 334   | - 343 | 0    | K.FVTICVTGDK.T                    |
| 1173.58                                                                                                                                                                                     | 1172.57  | 1172.60  | -21.82 | 175   | - 184 | 0    | K.CQPSAITLNR.Q + Propionamide (C) |
| 1333.67                                                                                                                                                                                     | 1332.66  | 1332.61  | 36.1   | 189   | - 199 | 0    | R.HVDNVMFENTK.I                   |
| 1395.75                                                                                                                                                                                     | 1394.74  | 1394.75  | -3.77  | 200   | - 209 | 1    | K.IVERFLNYWR.T                    |
| 1650.82                                                                                                                                                                                     | 1649.81  | 1649.83  | -10.58 | 175   | - 188 | 1    | K.CQPSAITLNRQTYR.H                |
| <b>No match to:</b> 913.43, 973.52, 1098.56, 1141.61, 1162.61, 1179.59, 1461.77, 1475.75, 1494.71, 1567.74, 1586.90, 1634.86, 1640.91, 1675.82, 1795.79, 2211.10, 2225.11, 2305.12, 2433.21 |          |          |        |       |       |      |                                   |

5. [gi|24642019](#) Mass: 93877 Score: 40 Expect: 5.1 Queries matched: 7

CG14411-PA, isoform A [Drosophila melanogaster]

| Observed                                                                                                                                                                           | Mr(expt) | Mr(calc) | ppm    | Start | End   | Miss | Peptide                         |
|------------------------------------------------------------------------------------------------------------------------------------------------------------------------------------|----------|----------|--------|-------|-------|------|---------------------------------|
| 842.51                                                                                                                                                                             | 841.50   | 841.54   | -43.24 | 240   | - 247 | 0    | K.LIASALVR.F                    |
| 1098.56                                                                                                                                                                            | 1097.55  | 1097.51  | 30.9   | 222   | - 230 | 0    | K.FAFQQQDSK.M                   |
| 1173.58                                                                                                                                                                            | 1172.57  | 1172.59  | -12.24 | 415   | - 424 | 1    | R.RLCTPETPEK.F                  |
| 1333.67                                                                                                                                                                            | 1332.66  | 1332.71  | -34.31 | 374   | - 384 | 1    | K.SENVMLELVRK.C + Oxidation (M) |
| 1567.74                                                                                                                                                                            | 1566.73  | 1566.81  | -48.81 | 504   | - 515 | 1    | K.EWVALEHPFQRR.L                |
| 1586.90                                                                                                                                                                            | 1585.89  | 1585.78  | 68.5   | 615   | - 626 | 1    | K.MFFSNPLYQQR.G                 |
| 1650.82                                                                                                                                                                            | 1649.81  | 1649.84  | -16.99 | 25    | - 39  | 0    | R.NTFTSYVAPLPGDLR.A             |
| <b>No match to:</b> 913.43, 973.52, 1082.55, 1141.61, 1162.61, 1179.59, 1395.75, 1461.77, 1475.75, 1494.71, 1634.86, 1640.91, 1675.82, 1795.79, 2211.10, 2225.11, 2305.12, 2433.21 |          |          |        |       |       |      |                                 |

6. [gi|20128991](#) Mass: 30427 Score: 40 Expect: 5.1 Queries matched: 5

CG17764-PA [Drosophila melanogaster]

| Observed                                                                                                                                                                                             | Mr(expt) | Mr(calc) | ppm   | Start | End   | Miss | Peptide                           |
|------------------------------------------------------------------------------------------------------------------------------------------------------------------------------------------------------|----------|----------|-------|-------|-------|------|-----------------------------------|
| 973.52                                                                                                                                                                                               | 972.51   | 972.51   | -0.58 | 36    | - 43  | 0    | K.FSSINLHR.M                      |
| 1179.59                                                                                                                                                                                              | 1178.58  | 1178.59  | -7.36 | 1     | - 10  | 1    | -.MSKAQQLMAR.D + Oxidation (M)    |
| 1461.77                                                                                                                                                                                              | 1460.76  | 1460.69  | 46.1  | 236   | - 248 | 0    | R.NIDIAESPMAQTR.R + Oxidation (M) |
| 1640.91                                                                                                                                                                                              | 1639.90  | 1639.82  | 46.0  | 71    | - 86  | 1    | K.APVETNADAPAMPYK.E               |
| 1650.82                                                                                                                                                                                              | 1649.81  | 1649.83  | -8.53 | 30    | - 43  | 1    | R.QSYGNKFFSSINLHR.M               |
| <b>No match to:</b> 842.51, 913.43, 1082.55, 1098.56, 1141.61, 1162.61, 1173.58, 1333.67, 1395.75, 1475.75, 1494.71, 1567.74, 1586.90, 1634.86, 1675.82, 1795.79, 2211.10, 2225.11, 2305.12, 2433.21 |          |          |       |       |       |      |                                   |

7. [gi|125982920](#) Mass: 59375 Score: 40 Expect: 5.2 Queries matched: 6

GA17465-PA [Drosophila pseudoobscura]

| Observed | Mr(expt) | Mr(calc) | ppm  | Start | End  | Miss | Peptide       |
|----------|----------|----------|------|-------|------|------|---------------|
| 973.52   | 972.51   | 972.50   | 17.7 | 61    | - 68 | 0    | K.QAVLHFRCR.N |

|         |         |         |        |           |   |                                            |
|---------|---------|---------|--------|-----------|---|--------------------------------------------|
| 1395.75 | 1394.74 | 1394.81 | -52.12 | 407 - 419 | 0 | K.LASDLVDPDVLVLR.K                         |
| 1475.75 | 1474.75 | 1474.69 | 36.4   | 61 - 72   | 1 | K.QAVLHFCRNCER.Y                           |
| 1634.86 | 1633.85 | 1633.87 | -12.74 | 274 - 287 | 0 | R.HQLGNLSPICLVNR.V + Propionamide (C)      |
| 2225.11 | 2224.10 | 2224.11 | -4.78  | 323 - 340 | 1 | K.QLVEYVVMIEVIMEKDR.K + Oxidation (M)      |
| 2305.12 | 2304.12 | 2304.18 | -26.99 | 50 - 68   | 1 | R.NHVDITENIPKQAVLHFCR.N + Propionamide (C) |

**No match to:** 842.51, 913.43, 1082.55, 1098.56, 1141.61, 1162.61, 1173.58, 1179.59, 1333.67, 1461.77, 1494.71, 1567.74, 1586.90, 1640.91, 1650.82, 1675.82, 1795.79, 2211.10, 2433.21

8. [gi|18447016](#) Mass: 30557 Score: 40 Expect: 5.4 Queries matched: 5

AT19038p [Drosophila melanogaster]

| Observed | Mr(expt) | Mr(calc) | ppm   | Start     | End Miss | Peptide                           |
|----------|----------|----------|-------|-----------|----------|-----------------------------------|
| 973.52   | 972.51   | 972.51   | -0.58 | 36 - 43   | 0        | K.FSSINLHR.M                      |
| 1179.59  | 1178.58  | 1178.59  | -7.36 | 1 - 10    | 1        | -.MSKAQQLMAR.D + Oxidation (M)    |
| 1461.77  | 1460.76  | 1460.69  | 46.1  | 238 - 250 | 0        | R.NIDIAESPMAQTR.R + Oxidation (M) |
| 1640.91  | 1639.90  | 1639.82  | 46.0  | 71 - 86   | 1        | K.APVETNADAPAMPYTK.E              |
| 1650.82  | 1649.81  | 1649.83  | -8.53 | 30 - 43   | 1        | R.QSYGNKFSSINLHR.M                |

**No match to:** 842.51, 913.43, 1082.55, 1098.56, 1141.61, 1162.61, 1173.58, 1333.67, 1395.75, 1475.75, 1494.71, 1567.74, 1586.90, 1634.86, 1675.82, 1795.79, 2211.10, 2225.11, 2305.12, 2433.21

9. [gi|125986756](#) Mass: 46335 Score: 39 Expect: 6.3 Queries matched: 6

GA12523-PA [Drosophila pseudoobscura]

| Observed | Mr(expt) | Mr(calc) | ppm    | Start     | End Miss | Peptide                              |
|----------|----------|----------|--------|-----------|----------|--------------------------------------|
| 973.52   | 972.51   | 972.49   | 25.3   | 175 - 182 | 1        | R.STRGPNWR.Q                         |
| 1082.55  | 1081.55  | 1081.56  | -11.24 | 255 - 262 | 0        | R.NIFDWLFK.R                         |
| 1333.67  | 1332.66  | 1332.65  | 5.96   | 238 - 249 | 1        | R.NKHPSVGSNSHEK.A                    |
| 1634.86  | 1633.85  | 1633.81  | 25.7   | 17 - 32   | 0        | K.GTSTVITTTAPQMGNR.S                 |
| 1650.82  | 1649.81  | 1649.80  | 5.45   | 17 - 32   | 0        | K.GTSTVITTTAPQMGNR.S + Oxidation (M) |
| 2433.21  | 2432.20  | 2432.34  | -55.29 | 289 - 309 | 1        | R.KPHTTERPTEKTTEKPTVKPK.L            |

**No match to:** 842.51, 913.43, 1098.56, 1141.61, 1162.61, 1173.58, 1179.59, 1395.75, 1461.77, 1475.75, 1494.71, 1567.74, 1586.90, 1640.91, 1675.82, 1795.79, 2211.10, 2225.11, 2305.12

10. [gi|24646878](#) Mass: 92725 Score: 38 Expect: 7.4 Queries matched: 8

CG7886-PA [Drosophila melanogaster]

| Observed | Mr(expt) | Mr(calc) | ppm    | Start     | End Miss | Peptide                              |
|----------|----------|----------|--------|-----------|----------|--------------------------------------|
| 1082.55  | 1081.55  | 1081.54  | 9.50   | 2 - 10    | 1        | M.SVSRVTMMR.K + Oxidation (M)        |
| 1098.56  | 1097.55  | 1097.53  | 14.5   | 2 - 10    | 1        | M.SVSRVTMMR.K + 2 Oxidation (M)      |
| 1141.61  | 1140.60  | 1140.54  | 56.0   | 758 - 766 | 0        | K.YSSMHVFVR.R + Oxidation (M)        |
| 1494.71  | 1493.70  | 1493.65  | 33.3   | 584 - 595 | 1        | K.SDHEFANERDFK.L                     |
| 1567.74  | 1566.73  | 1566.78  | -34.05 | 335 - 347 | 1        | R.SIHDRGLCLPEEK.Q + Propionamide (C) |
| 1634.86  | 1633.85  | 1633.78  | 41.5   | 106 - 119 | 0        | R.TYPQTNIDPIDTEK.R                   |
| 1795.79  | 1794.78  | 1794.86  | -43.06 | 436 - 450 | 1        | R.NDVMPEVIKNSQSYR.Q + Oxidation (M)  |
| 2211.10  | 2210.10  | 2210.12  | -10.18 | 451 - 470 | 1        | R.QSHFNRLVNSAATSPEVTPR.S             |

**No match to:** 842.51, 913.43, 973.52, 1162.61, 1173.58, 1179.59, 1333.67, 1395.75, 1461.77, 1475.75, 1586.90, 1640.91, 1650.82, 1675.82, 2225.11, 2305.12, 2433.21

11. [gi|21064159](#) Mass: 92755 Score: 38 Expect: 8.1 Queries matched: 8

AT27185p [Drosophila melanogaster]

| Observed | Mr(expt) | Mr(calc) | ppm    | Start     | End Miss | Peptide                             |
|----------|----------|----------|--------|-----------|----------|-------------------------------------|
| 1082.55  | 1081.55  | 1081.54  | 9.50   | 2 - 10    | 1        | M.SVSRVTMMR.K + Oxidation (M)       |
| 1098.56  | 1097.55  | 1097.53  | 14.5   | 2 - 10    | 1        | M.SVSRVTMMR.K + 2 Oxidation (M)     |
| 1141.61  | 1140.60  | 1140.54  | 56.0   | 758 - 766 | 0        | K.YSSMHVFVR.R + Oxidation (M)       |
| 1494.71  | 1493.70  | 1493.65  | 33.3   | 584 - 595 | 1        | K.SDHEFANERDFK.L                    |
| 1567.74  | 1566.73  | 1566.73  | -3.66  | 174 - 187 | 0        | K.ALADNECLETVSFR.K                  |
| 1634.86  | 1633.85  | 1633.78  | 41.5   | 106 - 119 | 0        | R.TYPQTNIDPIDTEK.R                  |
| 1795.79  | 1794.78  | 1794.86  | -43.06 | 436 - 450 | 1        | R.NDVMPEVIKNSQSYR.Q + Oxidation (M) |
| 2211.10  | 2210.10  | 2210.12  | -10.18 | 451 - 470 | 1        | R.QSHFNRLVNSAATSPEVTPR.S            |

**No match to:** 842.51, 913.43, 973.52, 1162.61, 1173.58, 1179.59, 1333.67, 1395.75, 1461.77, 1475.75, 1586.90, 1640.91, 1650.82, 1675.82, 2225.11, 2305.12, 2433.21

12. [gi|20151513](#) Mass: 3968 Score: 38 Expect: 8.3 Queries matched: 3

GM09207p [Drosophila melanogaster]

| Observed | Mr(expt) | Mr(calc) | ppm    | Start   | End Miss | Peptide                         |
|----------|----------|----------|--------|---------|----------|---------------------------------|
| 842.51   | 841.50   | 841.55   | -56.59 | 11 - 17 | 1        | K.AIRILTR.D                     |
| 1141.61  | 1140.60  | 1140.68  | -65.08 | 22 - 31 | 0        | R.IPHHTALKPK.S                  |
| 1162.61  | 1161.61  | 1161.62  | -10.75 | 1 - 10  | 1        | -.MVLDAIRSNAK.A + Oxidation (M) |

**No match to:** 913.43, 973.52, 1082.55, 1098.56, 1173.58, 1179.59, 1333.67, 1395.75, 1461.77, 1475.75, 1494.71, 1567.74, 1586.90, 1634.86, 1640.91, 1650.82, 1675.82, 1795.79, 2211.10, 2225.11, 2305.12, 2433.21

13. [gi|125986509](#) Mass: 39107 Score: 37 Expect: 10 Queries matched: 5  
GAI8584-PA [Drosophila pseudoobscura]
- | Observed | Mr(expt) | Mr(calc) | ppm    | Start | End | Miss | Peptide                               |
|----------|----------|----------|--------|-------|-----|------|---------------------------------------|
| 973.52   | 972.51   | 972.49   | 29.2   | 248   | 255 | 0    | R.DKPHAMFK.R                          |
| 1162.61  | 1161.61  | 1161.55  | 48.6   | 74    | 85  | 1    | K.SGGTRNGGNTNK.T                      |
| 1567.74  | 1566.73  | 1566.78  | -31.04 | 47    | 60  | 1    | K.EVAEAYEVLSKSK.R                     |
| 1640.91  | 1639.90  | 1639.93  | -18.47 | 207   | 220 | 1    | K.EDKVLQISIKPGWK.S                    |
| 1795.79  | 1794.78  | 1794.86  | -47.21 | 271   | 287 | 0    | K.QALCGVVFQVPTMSGDK.L + Oxidation (M) |
- No match to: 842.51, 913.43, 1082.55, 1098.56, 1141.61, 1173.58, 1179.59, 1333.67, 1395.75, 1461.77, 1475.75, 1494.71, 1586.90, 1634.86, 1650.82, 1675.82, 2211.10, 2225.11, 2305.12, 2433.21
14. [gi|224804](#) Mass: 8951 Score: 37 Expect: 10 Queries matched: 3  
caudal 38E gene
- | Observed | Mr(expt) | Mr(calc) | ppm    | Start | End | Miss | Peptide                           |
|----------|----------|----------|--------|-------|-----|------|-----------------------------------|
| 1333.67  | 1332.66  | 1332.69  | -20.33 | 39    | 50  | 0    | K.SELAQTLSLSER.Q                  |
| 1461.77  | 1460.76  | 1460.78  | -15.88 | 38    | 50  | 1    | R.KSELAQTLSLSER.Q                 |
| 1475.75  | 1474.75  | 1474.72  | 14.9   | 26    | 36  | 1    | K.EYCTSRITIR.R + Propionamide (C) |
- No match to: 842.51, 913.43, 973.52, 1082.55, 1098.56, 1141.61, 1162.61, 1173.58, 1179.59, 1395.75, 1494.71, 1567.74, 1586.90, 1634.86, 1640.91, 1650.82, 1675.82, 1795.79, 2211.10, 2225.11, 2305.12, 2433.21
15. [gi|6531636](#) Mass: 19387 Score: 37 Expect: 10 Queries matched: 4  
TC21 ras-related [Drosophila melanogaster]
- | Observed | Mr(expt) | Mr(calc) | ppm    | Start | End | Miss | Peptide                           |
|----------|----------|----------|--------|-------|-----|------|-----------------------------------|
| 1173.58  | 1172.57  | 1172.55  | 18.8   | 18    | 27  | 0    | K.QCNIDDVPAK.L + Propionamide (C) |
| 1567.74  | 1566.73  | 1566.72  | 7.67   | 80    | 92  | 1    | K.DRDEFPLMVGNK.C + Oxidation (M)  |
| 1650.82  | 1649.81  | 1649.86  | -30.29 | 112   | 125 | 1    | R.NLMIPYIECSAKLR.V                |
| 1795.79  | 1794.78  | 1794.85  | -36.80 | 28    | 43  | 0    | K.LDILDITAGQEEFSAMR.E             |
- No match to: 842.51, 913.43, 973.52, 1082.55, 1098.56, 1141.61, 1162.61, 1179.59, 1333.67, 1395.75, 1461.77, 1475.75, 1494.71, 1586.90, 1634.86, 1640.91, 1675.82, 2211.10, 2225.11, 2305.12, 2433.21
16. [gi|6665667](#) Mass: 198883 Score: 36 Expect: 12 Queries matched: 9  
UNC-13 [Drosophila melanogaster]
- | Observed | Mr(expt) | Mr(calc) | ppm    | Start | End  | Miss | Peptide                                            |
|----------|----------|----------|--------|-------|------|------|----------------------------------------------------|
| 913.43   | 912.42   | 912.44   | -18.07 | 993   | 999  | 0    | R.IDLSMYR.N + Oxidation (M)                        |
| 973.52   | 972.51   | 972.51   | 7.51   | 1538  | 1545 | 0    | K.SPELQMLR.Y                                       |
| 1098.56  | 1097.55  | 1097.55  | -2.25  | 970   | 979  | 1    | R.FAASNFGKEK.F                                     |
| 1179.59  | 1178.58  | 1178.55  | 23.5   | 628   | 638  | 1    | R.QGVRCTECGVK.C                                    |
| 1395.75  | 1394.74  | 1394.76  | -13.30 | 73    | 86   | 1    | K.KASTVGMFSGILGK.A                                 |
| 1475.75  | 1474.75  | 1474.75  | -5.35  | 1700  | 1711 | 1    | K.GSVACWLPLMRR.I + Oxidation (M); Propionamide (C) |
| 1494.71  | 1493.70  | 1493.74  | -22.01 | 392   | 405  | 0    | K.VDSNIEASFASLNK.K                                 |
| 1567.74  | 1566.73  | 1566.75  | -15.01 | 406   | 419  | 1    | K.KSDSFTPTNDSLQK.H                                 |
| 1640.91  | 1639.90  | 1639.80  | 61.4   | 474   | 488  | 0    | R.GETEEVVGGMQVLR.Q                                 |
- No match to: 842.51, 1082.55, 1141.61, 1162.61, 1173.58, 1333.67, 1461.77, 1586.90, 1634.86, 1650.82, 1675.82, 1795.79, 2211.10, 2225.11, 2305.12, 2433.21
17. [gi|24653385](#) Mass: 149429 Score: 36 Expect: 12 Queries matched: 8  
centrosomin CG4832-PC, isoform C [Drosophila melanogaster]
- | Observed | Mr(expt) | Mr(calc) | ppm    | Start | End  | Miss | Peptide                                                |
|----------|----------|----------|--------|-------|------|------|--------------------------------------------------------|
| 973.52   | 972.51   | 972.56   | -48.17 | 575   | 582  | 1    | K.QLQTEVKK.K                                           |
| 1082.55  | 1081.55  | 1081.55  | -3.35  | 1215  | 1223 | 1    | R.AMLKTVEMK.T + 2 Oxidation (M)                        |
| 1141.61  | 1140.60  | 1140.55  | 49.7   | 489   | 497  | 1    | R.ERIHEQACR.T                                          |
| 1333.67  | 1332.66  | 1332.67  | -6.99  | 44    | 54   | 1    | R.ELEEQMSALRK.E                                        |
| 1650.82  | 1649.81  | 1649.77  | 27.5   | 527   | 542  | 1    | K.ENDCAKTVISPSSGR.S                                    |
| 1795.79  | 1794.78  | 1794.81  | -14.77 | 910   | 923  | 0    | R.MLNVQCQMVELDNR.Y + 2 Oxidation (M); Propionamide (C) |
| 2305.12  | 2304.12  | 2304.21  | -42.17 | 304   | 323  | 1    | K.NVLNLYEALIAKLNAELETMR.Q                              |
| 2433.21  | 2432.20  | 2432.23  | -12.06 | 1048  | 1067 | 0    | R.DWVALTYQEQAQLLELQR.S                                 |
- No match to: 842.51, 913.43, 1098.56, 1162.61, 1173.58, 1179.59, 1395.75, 1461.77, 1475.75, 1494.71, 1567.74, 1586.90, 1634.86, 1640.91, 1675.82, 2211.10, 2225.11
18. [gi|578301](#) Mass: 22233 Score: 35 Expect: 14 Queries matched: 4  
put. cad fragment [Drosophila melanogaster]
- | Observed | Mr(expt) | Mr(calc) | ppm    | Start | End | Miss | Peptide                           |
|----------|----------|----------|--------|-------|-----|------|-----------------------------------|
| 1333.67  | 1332.66  | 1332.69  | -20.33 | 92    | 103 | 0    | K.SELAQTLSLSER.Q                  |
| 1461.77  | 1460.76  | 1460.78  | -15.88 | 91    | 103 | 1    | R.KSELAQTLSLSER.Q                 |
| 1475.75  | 1474.75  | 1474.72  | 14.9   | 79    | 89  | 1    | K.EYCTSRITIR.R + Propionamide (C) |
| 2433.21  | 2432.20  | 2432.26  | -21.85 | 175   | 197 | 0    | R.LHPHLAAHSHSLAAVAHSHQLQ.-        |
- No match to: 842.51, 913.43, 973.52, 1082.55, 1098.56, 1141.61, 1162.61, 1173.58, 1179.59, 1395.75, 1494.71,

1567.74, 1586.90, 1634.86, 1640.91, 1650.82, 1675.82, 1795.79, 2211.10, 2225.11, 2305.12

19. [gi|17016304](#) Mass: 27877 Score: 35 Expect: 15 Queries matched: 4

dacapo [Drosophila virilis]

| Observed | Mr(expt) | Mr(calc) | ppm | Start | End | Miss | Peptide |
|----------|----------|----------|-----|-------|-----|------|---------|
|----------|----------|----------|-----|-------|-----|------|---------|

|         |         |         |      |    |   |    |   |                |
|---------|---------|---------|------|----|---|----|---|----------------|
| 1173.58 | 1172.57 | 1172.53 | 33.9 | 13 | - | 22 | 1 | R.SEFCKMSVSR.N |
|---------|---------|---------|------|----|---|----|---|----------------|

|         |         |         |        |   |   |    |   |                  |
|---------|---------|---------|--------|---|---|----|---|------------------|
| 1395.75 | 1394.74 | 1394.76 | -16.67 | 1 | - | 12 | 1 | -.MVSARMLHPVVR.S |
|---------|---------|---------|--------|---|---|----|---|------------------|

|         |         |         |      |   |   |    |   |                                  |
|---------|---------|---------|------|---|---|----|---|----------------------------------|
| 1461.77 | 1460.76 | 1460.73 | 22.9 | 6 | - | 17 | 1 | R.MLHPVVRSEFCK.M + Oxidation (M) |
|---------|---------|---------|------|---|---|----|---|----------------------------------|

|         |         |         |      |     |   |     |   |                                           |
|---------|---------|---------|------|-----|---|-----|---|-------------------------------------------|
| 2433.21 | 2432.20 | 2432.10 | 41.8 | 105 | - | 126 | 0 | R.AAHVRPDAYSASDMDALLNER.A + Oxidation (M) |
|---------|---------|---------|------|-----|---|-----|---|-------------------------------------------|

No match to: 842.51, 913.43, 973.52, 1082.55, 1098.56, 1141.61, 1162.61, 1179.59, 1333.67, 1475.75, 1494.71, 1567.74, 1586.90, 1634.86, 1640.91, 1650.82, 1675.82, 1795.79, 2211.10, 2225.11, 2305.12

20. [gi|24657269](#) Mass: 22221 Score: 35 Expect: 17 Queries matched: 4

Ras oncogene at 64B CG1167-PA [Drosophila melanogaster]

| Observed | Mr(expt) | Mr(calc) | ppm | Start | End | Miss | Peptide |
|----------|----------|----------|-----|-------|-----|------|---------|
|----------|----------|----------|-----|-------|-----|------|---------|

|         |         |         |      |    |   |    |   |                                   |
|---------|---------|---------|------|----|---|----|---|-----------------------------------|
| 1173.58 | 1172.57 | 1172.55 | 18.8 | 45 | - | 54 | 0 | K.QCNIDDVPAK.L + Propionamide (C) |
|---------|---------|---------|------|----|---|----|---|-----------------------------------|

|         |         |         |      |     |   |     |   |                                  |
|---------|---------|---------|------|-----|---|-----|---|----------------------------------|
| 1567.74 | 1566.73 | 1566.72 | 7.67 | 107 | - | 119 | 1 | K.DRDEFPLMVGNK.C + Oxidation (M) |
|---------|---------|---------|------|-----|---|-----|---|----------------------------------|

|         |         |         |        |     |   |     |   |                    |
|---------|---------|---------|--------|-----|---|-----|---|--------------------|
| 1650.82 | 1649.81 | 1649.86 | -30.29 | 139 | - | 152 | 1 | R.NLMIPYIECSAKLR.V |
|---------|---------|---------|--------|-----|---|-----|---|--------------------|

|         |         |         |        |    |   |    |   |                     |
|---------|---------|---------|--------|----|---|----|---|---------------------|
| 1795.79 | 1794.78 | 1794.85 | -36.80 | 55 | - | 70 | 0 | K.LDILDTAGQEFSAMR.E |
|---------|---------|---------|--------|----|---|----|---|---------------------|

No match to: 842.51, 913.43, 973.52, 1082.55, 1098.56, 1141.61, 1162.61, 1179.59, 1333.67, 1395.75, 1461.77, 1475.75, 1494.71, 1586.90, 1634.86, 1640.91, 1675.82, 2211.10, 2225.11, 2305.12, 2433.21

## Search Parameters

Type of search : Peptide Mass Fingerprint  
 Enzyme : Trypsin  
 Variable modifications : Oxidation (M), Propionamide (C)  
 Mass values : Monoisotopic  
 Protein Mass : Unrestricted  
 Peptide Mass Tolerance :  $\pm 70$  ppm  
 Peptide Charge State : 1+  
 Max Missed Cleavages : 1  
 Number of queries : 25

Mascot: <http://www.matrixscience.com/>

# Mascot Search Results

**User** : Ilya  
**Email** : toropygin@rambler.ru  
**Search title** : Submitted from Shidlovsky 080328 II by Mascot Daemon on P4P800SE  
**MS data file** : \\192.168.0.18\data on ultraflex-2\DATA\2008\_Ilya\Shidlovsky\080328\010\0\_J24\1\010\_0\_J24\_1.dar  
**Database** : NCBIInr 20070307 (4984280 sequences; 1723577896 residues)  
**Taxonomy** : Drosophila (fruit flies) (47828 sequences)  
**Timestamp** : 2 Apr 2008 at 19:56:31 GMT  
**Top Score** : 100 for **gi|5081626**, origin recognition complex subunit 3 [Drosophila melanogaster]

## Probability Based Mowse Score

Protein score is  $-10 \cdot \log(P)$ , where P is the probability that the observed match is a random event. Protein scores greater than 59 are significant ( $p < 0.05$ ).

Score Distribution

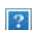

## Protein Summary Report

|                           |                      |
|---------------------------|----------------------|
| Protein Summary           | <a href="#">Help</a> |
| Significance threshold p< | Max. number of hits  |

## Overview Table

Click on column header to jump to entry in results list.  
 Move mouse over any indicator to highlight identical peptides.  
 Click on an indicator to see details of individual match.  
 Use check boxes to select sub-set of queries for new search.

Mouse over:

| Hit:                         | 1 | 2 | 3 | 4 | 5 | 6 | 7 | 8 | 9 | 10 | 11 | 12 | 13 | 14 | 15 | 16 | 17 | 18 | 19 | 20 |
|------------------------------|---|---|---|---|---|---|---|---|---|----|----|----|----|----|----|----|----|----|----|----|
| <a href="#">1015.53</a> (1+) |   |   |   |   |   |   |   |   |   |    |    |    |    |    |    |    |    |    |    |    |
| <a href="#">1171.55</a> (1+) |   |   |   |   |   |   |   |   |   |    |    |    |    |    |    |    |    |    |    |    |
| <a href="#">1201.58</a> (1+) |   |   |   |   |   |   |   |   |   |    |    |    |    |    |    |    |    |    |    |    |
| <a href="#">1320.71</a> (1+) |   |   |   |   |   |   |   |   |   |    |    |    |    |    |    |    |    |    |    |    |
| <a href="#">1351.75</a> (1+) |   |   |   |   |   |   |   |   |   |    |    |    |    |    |    |    |    |    |    |    |
| <a href="#">1399.73</a> (1+) |   |   |   |   |   |   |   |   |   |    |    |    |    |    |    |    |    |    |    |    |
| <a href="#">1518.72</a> (1+) |   |   |   |   |   |   |   |   |   |    |    |    |    |    |    |    |    |    |    |    |
| <a href="#">1553.85</a> (1+) |   |   |   |   |   |   |   |   |   |    |    |    |    |    |    |    |    |    |    |    |
| <a href="#">1569.85</a> (1+) |   |   |   |   |   |   |   |   |   |    |    |    |    |    |    |    |    |    |    |    |
| <a href="#">1586.79</a> (1+) |   |   |   |   |   |   |   |   |   |    |    |    |    |    |    |    |    |    |    |    |
| <a href="#">1703.94</a> (1+) |   |   |   |   |   |   |   |   |   |    |    |    |    |    |    |    |    |    |    |    |
| <a href="#">1714.89</a> (1+) |   |   |   |   |   |   |   |   |   |    |    |    |    |    |    |    |    |    |    |    |
| <a href="#">1807.04</a> (1+) |   |   |   |   |   |   |   |   |   |    |    |    |    |    |    |    |    |    |    |    |
| <a href="#">1830.96</a> (1+) |   |   |   |   |   |   |   |   |   |    |    |    |    |    |    |    |    |    |    |    |
| <a href="#">1936.91</a> (1+) |   |   |   |   |   |   |   |   |   |    |    |    |    |    |    |    |    |    |    |    |



|         |         |         |      |     |   |     |   |                                      |
|---------|---------|---------|------|-----|---|-----|---|--------------------------------------|
| 1586.79 | 1585.79 | 1585.74 | 28.4 | 43  | - | 54  | 0 | K.EVVQPPFYEEYR.K                     |
| 1703.94 | 1702.94 | 1702.89 | 27.0 | 75  | - | 89  | 0 | R.TLEQLVDFVVGQAER.D                  |
| 1714.89 | 1713.88 | 1713.84 | 26.4 | 43  | - | 55  | 1 | K.EVVQPPFYEEYRK.A                    |
| 1807.04 | 1806.04 | 1806.00 | 20.6 | 568 | - | 582 | 0 | K.TLQLIETQIVQDHLR.A                  |
| 1830.96 | 1829.96 | 1829.95 | 2.31 | 265 | - | 281 | 0 | R.VFQTQAAPTGLNEVLDK.V                |
| 2339.29 | 2338.29 | 2338.23 | 23.6 | 583 | - | 603 | 0 | R.ALQDAPPIHELFFVFSDIATVR.R           |
| 2499.24 | 2498.23 | 2498.19 | 18.4 | 670 | - | 692 | 0 | R.SVVSQSDNEEVAQEIDPQIQAR.F           |
| 3362.75 | 3361.74 | 3361.72 | 6.81 | 90  | - | 120 | 0 | R.DTPDEVLPATAALLTGINQPDHLSQFTALTQR.L |

**No match to:** 1015.53, 1171.55, 1201.58, 1320.71, 1936.91, 1952.91, 2023.07, 2102.12, 2124.98, 2137.17, 2284.23, 2585.28, 2722.45, 2808.38, 3570.52

3. [gi|17136788](#) Mass: 82201 Score: 86 Expect: 0.00012 Queries matched: 12

latheo CG4088-PA, isoform A [Drosophila melanogaster]

| Observed | Mr(expt) | Mr(calc) | ppm   | Start | End | Miss | Peptide |                                      |
|----------|----------|----------|-------|-------|-----|------|---------|--------------------------------------|
| 1351.75  | 1350.74  | 1350.75  | -9.81 | 696   | -   | 707  | 0       | R.AVAELQFLGYIK.M                     |
| 1399.73  | 1398.73  | 1398.70  | 19.2  | 552   | -   | 563  | 0       | R.HQLNTPTTQFGR.A                     |
| 1518.72  | 1517.71  | 1517.64  | 43.5  | 190   | -   | 201  | 0       | K.SWYTNFDFSEQK.R                     |
| 1553.85  | 1552.84  | 1552.79  | 34.4  | 658   | -   | 669  | 0       | R.MINLFDWLQAFR.S                     |
| 1569.85  | 1568.84  | 1568.78  | 38.6  | 658   | -   | 669  | 0       | R.MINLFDWLQAFR.S + Oxidation (M)     |
| 1586.79  | 1585.79  | 1585.74  | 28.4  | 43    | -   | 54   | 0       | K.EVVQPPFYEEYR.K                     |
| 1703.94  | 1702.94  | 1702.89  | 27.0  | 75    | -   | 89   | 0       | R.TLEQLVDFVVGQAER.D                  |
| 1714.89  | 1713.88  | 1713.84  | 26.4  | 43    | -   | 55   | 1       | K.EVVQPPFYEEYRK.A                    |
| 1807.04  | 1806.04  | 1806.00  | 20.6  | 568   | -   | 582  | 0       | K.TLQLIETQIVQDHLR.A                  |
| 1830.96  | 1829.96  | 1829.95  | 2.31  | 265   | -   | 281  | 0       | R.VFQTQAAPTGLNEVLDK.V                |
| 2339.29  | 2338.29  | 2338.23  | 23.6  | 583   | -   | 603  | 0       | R.ALQDAPPIHELFFVFSDIATVR.R           |
| 3362.75  | 3361.74  | 3361.72  | 6.81  | 90    | -   | 120  | 0       | R.DTPDEVLPATAALLTGINQPDHLSQFTALTQR.L |

**No match to:** 1015.53, 1171.55, 1201.58, 1320.71, 1936.91, 1952.91, 2023.07, 2102.12, 2124.98, 2137.17, 2284.23, 2499.24, 2585.28, 2722.45, 2808.38, 3570.52

4. [gi|125976956](#) Mass: 23171 Score: 43 Expect: 2.3 Queries matched: 5

GA20782-PA [Drosophila pseudoobscura]

| Observed | Mr(expt) | Mr(calc) | ppm    | Start | End | Miss | Peptide |                                          |
|----------|----------|----------|--------|-------|-----|------|---------|------------------------------------------|
| 1399.73  | 1398.73  | 1398.78  | -35.23 | 56    | -   | 67   | 1       | R.LGLNTPTRQMR.Y                          |
| 1553.85  | 1552.84  | 1552.82  | 15.8   | 68    | -   | 79   | 0       | R.YEQALPLHLWR.G                          |
| 1703.94  | 1702.94  | 1702.92  | 11.5   | 1     | -   | 14   | 0       | -.LQEFITDLVVPHHR.C                       |
| 1952.91  | 1951.90  | 1951.99  | -42.02 | 15    | -   | 31   | 0       | R.CNVNIIPEHITMLEGAK.S + Propionamide (C) |
| 2124.98  | 2123.97  | 2124.08  | -52.51 | 15    | -   | 33   | 1       | R.CNVNIIPEHITMLEGAKSR.K                  |

**No match to:** 1015.53, 1171.55, 1201.58, 1320.71, 1351.75, 1518.72, 1569.85, 1586.79, 1714.89, 1807.04, 1830.96, 1936.91, 2023.07, 2102.12, 2137.17, 2284.23, 2339.29, 2499.24, 2585.28, 2722.45, 2808.38, 3362.75, 3570.52

5. [gi|24648911](#) Mass: 82796 Score: 41 Expect: 3.7 Queries matched: 7

CG31423-PA [Drosophila melanogaster]

| Observed | Mr(expt) | Mr(calc) | ppm    | Start | End | Miss | Peptide |                                                                  |
|----------|----------|----------|--------|-------|-----|------|---------|------------------------------------------------------------------|
| 1015.53  | 1014.53  | 1014.60  | -68.93 | 132   | -   | 139  | 1       | K.NPQLKFLR.E                                                     |
| 1399.73  | 1398.73  | 1398.81  | -56.09 | 401   | -   | 412  | 1       | R.FMDVLHKLGVLK.L                                                 |
| 1569.85  | 1568.84  | 1568.85  | -6.79  | 140   | -   | 152  | 1       | R.ELINVIEEGREIR.T                                                |
| 1586.79  | 1585.79  | 1585.87  | -54.18 | 60    | -   | 73   | 1       | K.IVARPTLSIDSRRCR.S                                              |
| 1714.89  | 1713.88  | 1713.86  | 14.1   | 344   | -   | 357  | 1       | K.YNLSLKLYDQNESK.S                                               |
| 2499.24  | 2498.23  | 2498.19  | 17.8   | 586   | -   | 606  | 1       | K.SFDERVFCESESLTIAWNLP.M                                         |
| 2808.38  | 2807.37  | 2807.31  | 19.6   | 188   | -   | 212  | 0       | R.ISGYFNDQAVILACMGENS DYGLLK.S + Oxidation (M); Propionamide (C) |

**No match to:** 1171.55, 1201.58, 1320.71, 1351.75, 1518.72, 1553.85, 1703.94, 1807.04, 1830.96, 1936.91, 1952.91, 2023.07, 2102.12, 2124.98, 2137.17, 2284.23, 2339.29, 2585.28, 2722.45, 3362.75, 3570.52

6. [gi|24644214](#) Mass: 29890 Score: 40 Expect: 5.4 Queries matched: 5

CG14667-PA, isoform A [Drosophila melanogaster]

| Observed | Mr(expt) | Mr(calc) | ppm    | Start | End | Miss | Peptide |                                                        |
|----------|----------|----------|--------|-------|-----|------|---------|--------------------------------------------------------|
| 1201.58  | 1200.57  | 1200.62  | -36.97 | 20    | -   | 28   | 1       | R.DRNIFHMR.G                                           |
| 1703.94  | 1702.94  | 1703.00  | -37.06 | 31    | -   | 45   | 1       | K.YLGQLKLITGVELTR.N                                    |
| 1952.91  | 1951.90  | 1951.94  | -18.32 | 237   | -   | 253  | 1       | R.RFQCTICHEAFASLGAK.L + Propionamide (C)               |
| 2137.17  | 2136.16  | 2136.06  | 47.2   | 238   | -   | 255  | 1       | R.FQCTICHEAFASLGAKLR.H + 2 Propionamide (C)            |
| 3570.52  | 3569.51  | 3569.59  | -21.78 | 174   | -   | 202  | 0       | R.SNFFICDECGTLFHDAFLYTEHLNGHQNR.R + 2 Propionamide (C) |

**No match to:** 1015.53, 1171.55, 1320.71, 1351.75, 1399.73, 1518.72, 1553.85, 1569.85, 1586.79, 1714.89, 1807.04, 1830.96, 1936.91, 2023.07, 2102.12, 2124.98, 2284.23, 2339.29, 2499.24, 2585.28, 2722.45, 2808.38, 3362.75

7. [gi|28137740](#) Mass: 69054 Score: 39 Expect: 5.9 Queries matched: 6

xanthine dehydrogenase [Drosophila koepferae]

| Observed | Mr(expt) | Mr(calc) | ppm    | Start | End | Miss | Peptide |                                        |
|----------|----------|----------|--------|-------|-----|------|---------|----------------------------------------|
| 1399.73  | 1398.73  | 1398.70  | 22.0   | 32    | -   | 43   | 0       | R.CTGYRPILEGYK.T                       |
| 1586.79  | 1585.79  | 1585.81  | -12.53 | 481   | -   | 494  | 0       | R.MDGELYLAFVLSTK.A                     |
| 1714.89  | 1713.88  | 1714.00  | -67.43 | 151   | -   | 164  | 1       | K.FKHFLYPVLLINPK.V                     |
| 2124.98  | 2123.97  | 2124.10  | -61.27 | 1     | -   | 19   | 1       | -.GIVMSMYALLRNAKPSMR.D + Oxidation (M) |
| 2284.23  | 2283.22  | 2283.19  | 15.0   | 460   | -   | 480  | 1       | K.VHVSALKQATGEAIYTDIPR.M               |

2808.38 2807.37 2807.36 2.88 225 - 252 0 R.NVACLGGNIMTASPISDMNTVLTAAQVLR.L + 2 Oxidation (M)  
**No match to:** 1015.53, 1171.55, 1201.58, 1320.71, 1351.75, 1518.72, 1553.85, 1569.85, 1703.94, 1807.04, 1830.96, 1936.91, 1952.91, 2023.07, 2102.12, 2137.17, 2339.29, 2499.24, 2585.28, 2722.45, 3362.75, 3570.52

8. [gi|24646727](#) Mass: 68953 Score: 39 Expect: 6.3 Queries matched: 7

Origin recognition complex subunit 2 CG3041-PA [Drosophila melanogaster]

| Observed | Mr(expt) | Mr(calc) | ppm    | Start | End   | Miss | Peptide                                                  |
|----------|----------|----------|--------|-------|-------|------|----------------------------------------------------------|
| 1201.58  | 1200.57  | 1200.61  | -33.05 | 576   | - 585 | 0    | R.AQLTEFLDHLK.L                                          |
| 1320.71  | 1319.71  | 1319.71  | -0.79  | 564   | - 575 | 0    | R.EAFLVSSDLALR.A                                         |
| 1830.96  | 1829.96  | 1829.91  | 23.9   | 140   | - 156 | 1    | K.RDAMALAAALNATPCTPK.T + Oxidation (M); Propionamide (C) |
| 1936.91  | 1935.90  | 1935.86  | 20.3   | 321   | - 337 | 0    | K.TSAEHEGSINAIMEEYR.S                                    |
| 1952.91  | 1951.90  | 1951.86  | 23.4   | 321   | - 337 | 0    | K.TSAEHEGSINAIMEEYR.S + Oxidation (M)                    |
| 2124.98  | 2123.97  | 2123.92  | 24.5   | 273   | - 291 | 0    | K.SNEFVPESDGYFHHSHASSK.I                                 |
| 2585.28  | 2584.27  | 2584.23  | 16.2   | 116   | - 138 | 0    | K.DLHLIQSEYNVAGTSMFGFNTPK.K + Oxidation (M)              |

**No match to:** 1015.53, 1171.55, 1351.75, 1399.73, 1518.72, 1553.85, 1569.85, 1586.79, 1703.94, 1714.89, 1807.04, 2023.07, 2102.12, 2137.17, 2284.23, 2339.29, 2499.24, 2722.45, 2808.38, 3362.75, 3570.52

9. [gi|125777612](#) Mass: 219672 Score: 38 Expect: 7.4 Queries matched: 10

GA19970-PA [Drosophila pseudoobscura]

| Observed | Mr(expt) | Mr(calc) | ppm    | Start | End    | Miss | Peptide                                  |
|----------|----------|----------|--------|-------|--------|------|------------------------------------------|
| 1015.53  | 1014.53  | 1014.50  | 23.6   | 1474  | - 1481 | 0    | K.EWLAFGHR.F                             |
| 1320.71  | 1319.71  | 1319.77  | -48.45 | 413   | - 423  | 1    | R.IHPKTVITFHK.A                          |
| 1351.75  | 1350.74  | 1350.78  | -28.94 | 406   | - 416  | 1    | R.SCLTIIRIHPK.T + Propionamide (C)       |
| 1399.73  | 1398.73  | 1398.63  | 69.2   | 1815  | - 1825 | 1    | K.CTELSMKNCTK.Y + 2 Propionamide (C)     |
| 1830.96  | 1829.96  | 1829.87  | 46.8   | 1763  | - 1777 | 1    | K.GRLAGYQDNYFHPHR.F                      |
| 1936.91  | 1935.90  | 1935.88  | 10.6   | 855   | - 871  | 0    | R.FIDCVCTEGGVTSEHIR.N + Propionamide (C) |
| 2023.07  | 2022.07  | 2022.01  | 30.2   | 1011  | - 1027 | 1    | K.VAFDTEVTPEQIENFRK.I                    |
| 2102.12  | 2101.11  | 2101.11  | -0.74  | 637   | - 653  | 1    | K.AILDHQFELVLRFMNK.A                     |
| 2124.98  | 2123.97  | 2123.94  | 13.9   | 1858  | - 1875 | 0    | R.TSSHFFYNQFSSNVAENR.T                   |
| 2722.45  | 2721.44  | 2721.45  | -5.71  | 1918  | - 1944 | 1    | K.GIIELAEVQSVTAAQPAQIGAKGVDEK.G          |

**No match to:** 1171.55, 1201.58, 1518.72, 1553.85, 1569.85, 1586.79, 1703.94, 1714.89, 1807.04, 1952.91, 2137.17, 2284.23, 2339.29, 2499.24, 2585.28, 2808.38, 3362.75, 3570.52

10. [gi|3342458](#) Mass: 36651 Score: 37 Expect: 9.1 Queries matched: 6

thymidylate synthase [Drosophila melanogaster]

| Observed | Mr(expt) | Mr(calc) | ppm   | Start | End   | Miss | Peptide                                 |
|----------|----------|----------|-------|-------|-------|------|-----------------------------------------|
| 1320.71  | 1319.71  | 1319.62  | 67.8  | 35    | - 44  | 0    | R.DEMHYLDLLR.H + Oxidation (M)          |
| 1569.85  | 1568.84  | 1568.80  | 25.1  | 71    | - 83  | 1    | R.FDMRNSFPLTTK.R                        |
| 1703.94  | 1702.94  | 1702.85  | 47.9  | 182   | - 195 | 1    | R.RIIMSAWNPLDMPK.M + 2 Oxidation (M)    |
| 1936.91  | 1935.90  | 1935.90  | -1.04 | 196   | - 212 | 0    | K.MALPPCHCLAQFYVSEK.R                   |
| 1952.91  | 1951.90  | 1951.90  | 2.28  | 196   | - 212 | 0    | K.MALPPCHCLAQFYVSEK.R + Oxidation (M)   |
| 2339.29  | 2338.29  | 2338.15  | 59.2  | 35    | - 53  | 1    | R.DEMHYLDLLRHIIANGEQR.M + Oxidation (M) |

**No match to:** 1015.53, 1171.55, 1201.58, 1351.75, 1399.73, 1518.72, 1553.85, 1586.79, 1714.89, 1807.04, 1830.96, 2023.07, 2102.12, 2124.98, 2137.17, 2284.23, 2499.24, 2585.28, 2722.45, 2808.38, 3362.75, 3570.52

11. [gi|37788606](#) Mass: 68676 Score: 37 Expect: 10 Queries matched: 6

xanthine dehydrogenase [Drosophila buzzatii]

| Observed | Mr(expt) | Mr(calc) | ppm    | Start | End   | Miss | Peptide                                  |
|----------|----------|----------|--------|-------|-------|------|------------------------------------------|
| 1015.53  | 1014.53  | 1014.56  | -29.11 | 253   | - 262 | 1    | R.LEVASRAGGR.R                           |
| 1399.73  | 1398.73  | 1398.70  | 22.0   | 32    | - 43  | 0    | R.CTYRPILEGYK.T                          |
| 1586.79  | 1585.79  | 1585.81  | -12.53 | 481   | - 494 | 0    | R.MDGELYLAFVLSTK.A                       |
| 1714.89  | 1713.88  | 1714.00  | -67.43 | 151   | - 164 | 1    | K.FKHFLYPVLINPVK.V                       |
| 2137.17  | 2136.16  | 2136.10  | 28.6   | 1     | - 19  | 1    | -.GIVMPMYALVRNAKPSMR.D + 2 Oxidation (M) |
| 2585.28  | 2584.27  | 2584.36  | -35.70 | 309   | - 332 | 1    | R.RDDDAIVNSAVNVNFKPGTNVVK.S              |

**No match to:** 1171.55, 1201.58, 1320.71, 1351.75, 1518.72, 1553.85, 1569.85, 1703.94, 1807.04, 1830.96, 1936.91, 1952.91, 2023.07, 2102.12, 2124.98, 2284.23, 2339.29, 2499.24, 2722.45, 2808.38, 3362.75, 3570.52

12. [gi|3915203](#) Mass: 42995 Score: 37 Expect: 11 Queries matched: 5

Uroporphyrinogen decarboxylase (URO-D) (UPD)

| Observed | Mr(expt) | Mr(calc) | ppm    | Start | End   | Miss | Peptide                                                        |
|----------|----------|----------|--------|-------|-------|------|----------------------------------------------------------------|
| 1015.53  | 1014.53  | 1014.52  | 10.5   | 344   | - 352 | 0    | R.SLATEMVHK.C                                                  |
| 1351.75  | 1350.74  | 1350.65  | 67.5   | 58    | - 67  | 1    | R.QHDFFFTVCR.T + Propionamide (C)                              |
| 1518.72  | 1517.71  | 1517.76  | -35.34 | 1     | - 13  | 1    | -.MTIKNNNNNTLK.H                                               |
| 1830.96  | 1829.96  | 1829.91  | 23.9   | 68    | - 82  | 1    | R.TPELACEVTMQPLRR.F + Oxidation (M); Propionamide (C)          |
| 2808.38  | 2807.37  | 2807.32  | 17.9   | 59    | - 81  | 1    | K.QHDFFFTVCRTPELACEVTMQPLR.R + Oxidation (M); Propionamide (C) |

**No match to:** 1171.55, 1201.58, 1320.71, 1399.73, 1553.85, 1569.85, 1586.79, 1703.94, 1714.89, 1807.04, 1936.91, 1952.91, 2023.07, 2102.12, 2124.98, 2137.17, 2284.23, 2339.29, 2499.24, 2585.28, 2722.45, 3362.75, 3570.52

13. [gi|125810666](#) Mass: 39351 Score: 36 Expect: 11 Queries matched: 5

GA14829-PA [Drosophila pseudoobscura]

| Observed | Mr(expt) | Mr(calc) | ppm    | Start | End   | Miss | Peptide      |
|----------|----------|----------|--------|-------|-------|------|--------------|
| 1015.53  | 1014.53  | 1014.55  | -18.04 | 231   | - 238 | 1    | R.IRDELVDR.L |



1351.75 1350.74 1350.65 67.5 43 - 52 1 R.KQHDFFTVCR.T + Propionamide (C)  
 1553.85 1552.84 1552.87 -21.28 1 - 13 1 -.QPFPVLKNDNLLR.A  
 1830.96 1829.96 1829.91 23.9 53 - 67 1 R.TPELACEVTMQPLRR.F + Oxidation (M); Propionamide (C)  
 2808.38 2807.37 2807.32 17.9 44 - 66 1 K.QHDFFTVCRTPPELACEVTMQPLR.R + Oxidation (M); Propionamide (C)  
**No match to:** 1171.55, 1201.58, 1320.71, 1399.73, 1518.72, 1569.85, 1586.79, 1703.94, 1714.89, 1807.04, 1936.91, 1952.91, 2023.07, 2102.12, 2124.98, 2137.17, 2284.23, 2339.29, 2499.24, 2585.28, 2722.45, 3362.75, 3570.52

14. [gi|125986649](#) Mass: 51171 Score: 36 Expect: 12 Queries matched: 6

GA11518-PA [Drosophila pseudoobscura]

| Observed | Mr(expt) | Mr(calc) | ppm    | Start | End | Miss | Peptide                                         |
|----------|----------|----------|--------|-------|-----|------|-------------------------------------------------|
| 1518.72  | 1517.71  | 1517.80  | -59.77 | 234   | -   | 247  | 1 R.KVFFHTDAAQAVGK.I                            |
| 1936.91  | 1935.90  | 1935.90  | 3.47   | 443   | -   | 458  | 0 R.EMSPLEWEMVQEGIDLK.S + 2 Oxidation (M)       |
| 2102.12  | 2101.11  | 2101.00  | 53.3   | 248   | -   | 266  | 0 K.IPMDVNAMNIDLMSISGHK.I + Oxidation (M)       |
| 2284.23  | 2283.22  | 2283.11  | 50.3   | 380   | -   | 401  | 0 K.DVALSSGSACTSASLEPSYVLR.A + Propionamide (C) |
| 2722.45  | 2721.44  | 2721.32  | 45.1   | 301   | -   | 327  | 0 R.SGTVPASLAVGLGAAAELSQQEMEYDK.K               |

**No match to:** 1015.53, 1171.55, 1201.58, 1320.71, 1351.75, 1399.73, 1553.85, 1569.85, 1586.79, 1703.94, 1714.89, 1807.04, 1830.96, 1952.91, 2023.07, 2124.98, 2137.17, 2339.29, 2499.24, 2585.28, 2808.38, 3362.75, 3570.52

15. [gi|21711659](#) Mass: 61204 Score: 36 Expect: 12 Queries matched: 6

GH23001p [Drosophila melanogaster]

| Observed | Mr(expt) | Mr(calc) | ppm    | Start | End | Miss | Peptide                                                 |
|----------|----------|----------|--------|-------|-----|------|---------------------------------------------------------|
| 1703.94  | 1702.94  | 1702.82  | 67.4   | 7     | -   | 21   | 0 K.TNASTDVIFSPFNYK.M                                   |
| 1936.91  | 1935.90  | 1935.98  | -39.92 | 382   | -   | 397  | 1 R.LQIQWELMSKDSMLK.E                                   |
| 1952.91  | 1951.90  | 1951.97  | -36.27 | 382   | -   | 397  | 1 R.LQIQWELMSKDSMLK.E + Oxidation (M)                   |
| 2722.45  | 2721.44  | 2721.42  | 6.85   | 87    | -   | 109  | 1 K.HLVRQLDAELSQRPFLFCMSPPLR.R + Oxidation (M)          |
| 2808.38  | 2807.37  | 2807.44  | -25.99 | 468   | -   | 494  | 1 K.SHNKPGLFTSPRPSRLTSAQEAAGGNK.V                       |
| 3362.75  | 3361.74  | 3361.51  | 68.5   | 7     | -   | 38   | 1 K.TNASTDVIFSPFNYKMTMDGATGSTSSGSLR.K + 2 Oxidation (M) |

**No match to:** 1015.53, 1171.55, 1201.58, 1320.71, 1351.75, 1399.73, 1518.72, 1553.85, 1569.85, 1586.79, 1714.89, 1807.04, 1830.96, 2023.07, 2102.12, 2124.98, 2137.17, 2284.23, 2339.29, 2499.24, 2585.28, 3570.52

16. [gi|37788628](#) Mass: 69063 Score: 36 Expect: 12 Queries matched: 6

xanthine dehydrogenase [Drosophila buzzatii]

| Observed | Mr(expt) | Mr(calc) | ppm    | Start | End | Miss | Peptide                                   |
|----------|----------|----------|--------|-------|-----|------|-------------------------------------------|
| 1015.53  | 1014.53  | 1014.56  | -29.11 | 253   | -   | 262  | 1 R.LEVASRAGGR.R                          |
| 1399.73  | 1398.73  | 1398.70  | 22.0   | 32    | -   | 43   | 0 R.CTGYRPILEGYK.T                        |
| 1586.79  | 1585.79  | 1585.81  | -12.53 | 481   | -   | 494  | 0 R.MDGEELYLAFVLSTK.A                     |
| 1714.89  | 1713.88  | 1714.00  | -67.43 | 151   | -   | 164  | 1 K.FKHFLYPVLINPVK.V                      |
| 2124.98  | 2123.97  | 2124.10  | -61.27 | 1     | -   | 19   | 1 -.GIVMSMYALLRNAAKPSMR.D + Oxidation (M) |
| 2585.28  | 2584.27  | 2584.36  | -35.70 | 309   | -   | 332  | 1 R.RDDIAIVNSAVNVNFKPGTNNVVK.S            |

**No match to:** 1171.55, 1201.58, 1320.71, 1351.75, 1518.72, 1553.85, 1569.85, 1703.94, 1807.04, 1830.96, 1936.91, 1952.91, 2023.07, 2102.12, 2137.17, 2284.23, 2339.29, 2499.24, 2722.45, 2808.38, 3362.75, 3570.52

17. [gi|37788634](#) Mass: 69032 Score: 36 Expect: 12 Queries matched: 6

xanthine dehydrogenase [Drosophila buzzatii]

| Observed | Mr(expt) | Mr(calc) | ppm    | Start | End | Miss | Peptide                                   |
|----------|----------|----------|--------|-------|-----|------|-------------------------------------------|
| 1015.53  | 1014.53  | 1014.56  | -29.11 | 253   | -   | 262  | 1 R.LEVASRAGGR.R                          |
| 1399.73  | 1398.73  | 1398.70  | 22.0   | 32    | -   | 43   | 0 R.CTGYRPILEGYK.T                        |
| 1586.79  | 1585.79  | 1585.81  | -12.53 | 481   | -   | 494  | 0 R.MDGEELYLAFVLSTK.A                     |
| 1714.89  | 1713.88  | 1714.00  | -67.43 | 151   | -   | 164  | 1 K.FKHFLYPVLINPVK.V                      |
| 2124.98  | 2123.97  | 2124.10  | -61.27 | 1     | -   | 19   | 1 -.GIVMSMYALLRNAAKPSMR.D + Oxidation (M) |
| 2585.28  | 2584.27  | 2584.36  | -35.70 | 309   | -   | 332  | 1 R.RDDIAIVNSAVNVNFKPGTNNVVK.S            |

**No match to:** 1171.55, 1201.58, 1320.71, 1351.75, 1518.72, 1553.85, 1569.85, 1703.94, 1807.04, 1830.96, 1936.91, 1952.91, 2023.07, 2102.12, 2137.17, 2284.23, 2339.29, 2499.24, 2722.45, 2808.38, 3362.75, 3570.52

18. [gi|125808420](#) Mass: 153274 Score: 36 Expect: 12 Queries matched: 8

GA10856-PA [Drosophila pseudoobscura]

| Observed | Mr(expt) | Mr(calc) | ppm    | Start | End | Miss | Peptide                                               |
|----------|----------|----------|--------|-------|-----|------|-------------------------------------------------------|
| 1171.55  | 1170.54  | 1170.57  | -24.32 | 658   | -   | 666  | 1 R.LRNYDEAYK.L                                       |
| 1201.58  | 1200.57  | 1200.61  | -33.07 | 262   | -   | 271  | 0 K.DVQELWQVK.N                                       |
| 1351.75  | 1350.74  | 1350.71  | 24.9   | 742   | -   | 753  | 1 K.GVYTRAALELCR.D                                    |
| 1586.79  | 1585.79  | 1585.79  | -3.74  | 1147  | -   | 1158 | 1 R.DLLYSMYQELRR.N                                    |
| 1714.89  | 1713.88  | 1713.78  | 58.0   | 883   | -   | 897  | 0 R.GGFYDEACGHYIALK.M + Propionamide (C)              |
| 2102.12  | 2101.11  | 2101.12  | -5.46  | 89    | -   | 106  | 1 K.ISVETGLRDPLTCLWSK.Q + Propionamide (C)            |
| 2499.24  | 2498.23  | 2498.20  | 14.9   | 564   | -   | 584  | 0 K.QCLGLWDLTQPNIFISYDAK.I + Propionamide (C)         |
| 3570.52  | 3569.51  | 3569.62  | -29.44 | 433   | -   | 465  | 0 R.NVSSMMNAEYCAALCPPQLILQAITADNPCK.D + Oxidation (M) |

**No match to:** 1015.53, 1320.71, 1399.73, 1518.72, 1553.85, 1569.85, 1703.94, 1807.04, 1830.96, 1936.91, 1952.91, 2023.07, 2124.98, 2137.17, 2284.23, 2339.29, 2585.28, 2722.45, 2808.38, 3362.75

19. [gi|37788610](#) Mass: 69055 Score: 36 Expect: 13 Queries matched: 6

xanthine dehydrogenase [Drosophila buzzatii]

| Observed | Mr(expt) | Mr(calc) | ppm    | Start | End | Miss | Peptide          |
|----------|----------|----------|--------|-------|-----|------|------------------|
| 1015.53  | 1014.53  | 1014.56  | -29.11 | 253   | -   | 262  | 1 R.LEVASRAGGR.R |

|         |         |         |        |     |   |     |   |                                         |
|---------|---------|---------|--------|-----|---|-----|---|-----------------------------------------|
| 1399.73 | 1398.73 | 1398.70 | 22.0   | 32  | - | 43  | 0 | R.CTGYRPILEGYK.T                        |
| 1586.79 | 1585.79 | 1585.81 | -12.53 | 481 | - | 494 | 0 | R.MDGELYLAFVLSTK.A                      |
| 1714.89 | 1713.88 | 1714.00 | -67.43 | 151 | - | 164 | 1 | K.FKHFLYPVLINPVK.V                      |
| 2124.98 | 2123.97 | 2124.10 | -61.27 | 1   | - | 19  | 1 | -.GIVMSMYALLRNAAKPSMR.D + Oxidation (M) |
| 2585.28 | 2584.27 | 2584.36 | -35.70 | 309 | - | 332 | 1 | R.RDDDDIAIVNSAVNVNFKPGTINVVK.S          |

**No match to:** 1171.55, 1201.58, 1320.71, 1351.75, 1518.72, 1553.85, 1569.85, 1703.94, 1807.04, 1830.96, 1936.91, 1952.91, 2023.07, 2102.12, 2137.17, 2284.23, 2339.29, 2499.24, 2722.45, 2808.38, 3362.75, 3570.52

20. [gi|37788616](#) Mass: 69055 Score: 36 Expect: 13 Queries matched: 6

xanthine dehydrogenase [*Drosophila buzzatii*]

| Observed | Mr(expt) | Mr(calc) | ppm    | Start | End | Miss | Peptide |                                         |
|----------|----------|----------|--------|-------|-----|------|---------|-----------------------------------------|
| 1015.53  | 1014.53  | 1014.56  | -29.11 | 253   | -   | 262  | 1       | R.LEVASRAGGR.R                          |
| 1399.73  | 1398.73  | 1398.70  | 22.0   | 32    | -   | 43   | 0       | R.CTGYRPILEGYK.T                        |
| 1586.79  | 1585.79  | 1585.81  | -12.53 | 481   | -   | 494  | 0       | R.MDGELYLAFVLSTK.A                      |
| 1714.89  | 1713.88  | 1714.00  | -67.43 | 151   | -   | 164  | 1       | K.FKHFLYPVLINPVK.V                      |
| 2124.98  | 2123.97  | 2124.10  | -61.27 | 1     | -   | 19   | 1       | -.GIVMSMYALLRNAAKPSMR.D + Oxidation (M) |
| 2585.28  | 2584.27  | 2584.36  | -35.70 | 309   | -   | 332  | 1       | R.RDDDDIAIVNSAVNVNFKPGTINVVK.S          |

**No match to:** 1171.55, 1201.58, 1320.71, 1351.75, 1518.72, 1553.85, 1569.85, 1703.94, 1807.04, 1830.96, 1936.91, 1952.91, 2023.07, 2102.12, 2137.17, 2284.23, 2339.29, 2499.24, 2722.45, 2808.38, 3362.75, 3570.52

## Search Parameters

Type of search : Peptide Mass Fingerprint  
 Enzyme : Trypsin  
 Variable modifications : Oxidation (M), Propionamide (C)  
 Mass values : Monoisotopic  
 Protein Mass : Unrestricted  
 Peptide Mass Tolerance : ± 70 ppm  
 Peptide Charge State : 1+  
 Max Missed Cleavages : 1  
 Number of queries : 28

Mascot: <http://www.matrixscience.com/>

# Mascot Search Results

**User** : Ilya  
**Email** : toropygin@rambler.ru  
**Search title** : Submitted from Shidlovsky 080324 II by Mascot Daemon on P4P800SE  
**MS data file** : \\192.168.0.18\data on ultraflex-2\DATA\2008\_Ilya\Shidlovsky\080325\013\0\_K13\3\013\_0\_K13\_3.dar  
**Database** : NCBI nr 20070307 (4984280 sequences; 1723577896 residues)  
**Taxonomy** : Drosophila (fruit flies) (47828 sequences)  
**Timestamp** : 3 Apr 2008 at 22:05:12 GMT  
**Top Score** : 158 for **gi|17137456**, Origin recognition complex subunit 1 CG10667-PA [Drosophila melanogaster]

## Probability Based Mowse Score

Protein score is  $-10 \cdot \log(P)$ , where P is the probability that the observed match is a random event. Protein scores greater than 59 are significant ( $p < 0.05$ ).

Score Distribution

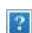

## Protein Summary Report

|                           |                      |
|---------------------------|----------------------|
| Protein Summary           | <a href="#">Help</a> |
| Significance threshold p< | Max. number of hits  |

## Overview Table

Click on column header to jump to entry in results list.  
 Move mouse over any indicator to highlight identical peptides.  
 Click on an indicator to see details of individual match.  
 Use check boxes to select sub-set of queries for new search.

Mouse over:

| Hit:                         | 1 | 2 | 3 | 4 | 5 | 6 | 7 | 8 | 9 | 10 | 11 | 12 | 13 | 14 | 15 | 16 | 17 | 18 | 19 | 20 |
|------------------------------|---|---|---|---|---|---|---|---|---|----|----|----|----|----|----|----|----|----|----|----|
| <a href="#">829.46</a> (1+)  |   |   |   |   |   |   |   |   |   |    |    |    |    |    |    |    |    |    |    |    |
| <a href="#">835.46</a> (1+)  |   |   |   |   |   |   |   |   |   |    |    |    |    |    |    |    |    |    |    |    |
| <a href="#">847.46</a> (1+)  |   |   |   |   |   |   |   |   |   |    |    |    |    |    |    |    |    |    |    |    |
| <a href="#">901.50</a> (1+)  |   |   |   |   |   |   |   |   |   |    |    |    |    |    |    |    |    |    |    |    |
| <a href="#">936.51</a> (1+)  |   |   |   |   |   |   |   |   |   |    |    |    |    |    |    |    |    |    |    |    |
| <a href="#">942.56</a> (1+)  |   |   |   |   |   |   |   |   |   |    |    |    |    |    |    |    |    |    |    |    |
| <a href="#">944.55</a> (1+)  |   |   |   |   |   |   |   |   |   |    |    |    |    |    |    |    |    |    |    |    |
| <a href="#">954.56</a> (1+)  |   |   |   |   |   |   |   |   |   |    |    |    |    |    |    |    |    |    |    |    |
| <a href="#">961.51</a> (1+)  |   |   |   |   |   |   |   |   |   |    |    |    |    |    |    |    |    |    |    |    |
| <a href="#">1020.53</a> (1+) |   |   |   |   |   |   |   |   |   |    |    |    |    |    |    |    |    |    |    |    |
| <a href="#">1057.62</a> (1+) |   |   |   |   |   |   |   |   |   |    |    |    |    |    |    |    |    |    |    |    |
| <a href="#">1058.58</a> (1+) |   |   |   |   |   |   |   |   |   |    |    |    |    |    |    |    |    |    |    |    |
| <a href="#">1074.62</a> (1+) |   |   |   |   |   |   |   |   |   |    |    |    |    |    |    |    |    |    |    |    |

|                              |   |   |   |   |   |   |   |   |   |  |  |   |   |   |   |  |  |   |   |
|------------------------------|---|---|---|---|---|---|---|---|---|--|--|---|---|---|---|--|--|---|---|
| <a href="#">1090.60</a> (1+) | ? | ? | ? | ? |   |   |   | ? |   |  |  | ? | ? | ? |   |  |  |   |   |
| <a href="#">1111.60</a> (1+) |   |   |   |   |   |   |   |   |   |  |  | ? |   |   |   |  |  |   |   |
| <a href="#">1120.64</a> (1+) | ? | ? |   |   |   |   |   | ? | ? |  |  |   |   | ? |   |  |  |   |   |
| <a href="#">1137.62</a> (1+) |   |   |   |   |   |   |   | ? |   |  |  |   |   | ? |   |  |  |   | ? |
| <a href="#">1143.60</a> (1+) |   |   |   |   |   |   |   | ? |   |  |  |   | ? |   |   |  |  | ? | ? |
| <a href="#">1202.64</a> (1+) |   |   |   |   |   |   |   |   |   |  |  |   |   | ? | ? |  |  |   | ? |
| <a href="#">1295.76</a> (1+) | ? | ? |   |   |   |   |   |   |   |  |  |   |   | ? |   |  |  |   |   |
| <a href="#">1318.81</a> (1+) |   |   |   |   |   |   |   |   |   |  |  |   |   |   |   |  |  |   | ? |
| <a href="#">1329.66</a> (1+) |   |   |   |   |   |   |   |   |   |  |  |   |   | ? |   |  |  |   |   |
| <a href="#">1368.76</a> (1+) | ? | ? |   |   |   |   |   |   |   |  |  |   |   | ? |   |  |  |   |   |
| <a href="#">1392.74</a> (1+) | ? | ? | ? | ? | ? | ? | ? |   |   |  |  |   |   | ? | ? |  |  |   |   |
| <a href="#">1399.77</a> (1+) |   |   |   |   |   |   |   |   |   |  |  |   |   | ? |   |  |  |   | ? |
| <a href="#">1410.81</a> (1+) | ? | ? |   |   |   |   |   |   |   |  |  |   |   |   |   |  |  |   | ? |
| <a href="#">1420.83</a> (1+) |   |   |   |   |   |   |   |   |   |  |  |   |   |   |   |  |  |   | ? |
| <a href="#">1433.78</a> (1+) |   |   |   |   |   |   |   |   |   |  |  |   |   |   |   |  |  |   | ? |
| <a href="#">1459.77</a> (1+) | ? | ? |   |   |   |   |   |   |   |  |  |   |   |   |   |  |  |   | ? |
| <a href="#">1511.85</a> (1+) | ? | ? | ? | ? |   |   |   |   |   |  |  |   |   |   |   |  |  |   | ? |
| <a href="#">1590.91</a> (1+) | ? | ? |   |   |   |   |   |   |   |  |  |   |   |   |   |  |  |   | ? |
| <a href="#">1671.01</a> (1+) | ? | ? |   |   |   |   |   |   |   |  |  |   |   |   |   |  |  |   | ? |
| <a href="#">1687.00</a> (1+) | ? | ? |   |   |   |   |   |   |   |  |  |   |   |   |   |  |  |   | ? |
| <a href="#">1713.04</a> (1+) | ? | ? |   |   |   |   |   |   |   |  |  |   |   |   |   |  |  |   | ? |
| <a href="#">1719.99</a> (1+) | ? | ? |   |   |   |   |   |   |   |  |  |   |   |   |   |  |  |   | ? |
| <a href="#">1736.00</a> (1+) | ? | ? |   |   |   |   |   |   |   |  |  |   |   |   |   |  |  |   | ? |
| <a href="#">1744.95</a> (1+) | ? | ? | ? | ? |   |   |   |   |   |  |  |   |   |   |   |  |  |   | ? |
| <a href="#">1747.00</a> (1+) | ? | ? |   |   |   |   |   |   |   |  |  |   |   |   |   |  |  |   | ? |
| <a href="#">1762.03</a> (1+) | ? | ? |   |   |   |   |   |   |   |  |  |   |   |   |   |  |  |   | ? |
| <a href="#">1840.01</a> (1+) |   |   |   |   |   |   |   |   |   |  |  |   |   |   |   |  |  |   | ? |
| <a href="#">1887.10</a> (1+) | ? | ? |   |   |   |   |   |   |   |  |  |   |   |   |   |  |  |   | ? |
| <a href="#">1903.08</a> (1+) |   |   |   |   |   |   |   |   |   |  |  |   |   |   |   |  |  |   | ? |
| <a href="#">1925.01</a> (1+) |   |   |   |   |   |   |   |   |   |  |  |   |   |   |   |  |  |   | ? |
| <a href="#">2163.18</a> (1+) |   |   |   |   |   |   |   |   |   |  |  |   |   |   |   |  |  |   | ? |
| <a href="#">2193.13</a> (1+) |   |   |   |   |   |   |   |   |   |  |  |   |   |   |   |  |  |   | ? |
| <a href="#">2230.32</a> (1+) |   |   |   |   |   |   |   |   |   |  |  |   |   |   |   |  |  |   | ? |
| <a href="#">2241.33</a> (1+) | ? | ? |   |   |   |   |   |   |   |  |  |   |   |   |   |  |  |   | ? |
| <a href="#">2273.29</a> (1+) |   |   |   |   |   |   |   |   |   |  |  |   |   |   |   |  |  |   | ? |
| <a href="#">2284.30</a> (1+) |   |   |   |   |   |   |   |   |   |  |  |   |   |   |   |  |  |   | ? |
| <a href="#">2298.31</a> (1+) |   |   |   |   |   |   |   |   |   |  |  |   |   |   |   |  |  |   | ? |
| <a href="#">2469.34</a> (1+) | ? | ? |   |   |   |   |   |   |   |  |  |   |   |   |   |  |  |   | ? |
| <a href="#">2485.33</a> (1+) | ? | ? |   |   |   |   |   |   |   |  |  |   |   |   |   |  |  |   | ? |
| <a href="#">2550.37</a> (1+) |   |   |   |   |   |   |   |   |   |  |  |   |   |   |   |  |  |   | ? |
| <a href="#">2780.09</a> (1+) |   |   |   |   |   |   |   |   |   |  |  |   |   |   |   |  |  |   | ? |
| <a href="#">2780.57</a> (1+) |   |   |   |   |   |   |   |   |   |  |  |   |   |   |   |  |  |   | ? |
| <a href="#">2809.47</a> (1+) |   |   |   |   |   |   |   |   |   |  |  |   |   |   |   |  |  |   | ? |
| <a href="#">3211.66</a> (1+) |   |   |   |   |   |   |   |   |   |  |  |   |   |   |   |  |  |   | ? |
| <a href="#">3338.94</a> (1+) |   |   |   |   |   |   |   |   |   |  |  |   |   |   |   |  |  |   | ? |

## Index

| Accession                        | Mass   | Score | Description                                                               |
|----------------------------------|--------|-------|---------------------------------------------------------------------------|
| 1. <a href="#">gi 17137456</a>   | 103217 | 158   | Origin recognition complex subunit 1 CG10667-PA [Drosophila melanogaster] |
| 2. <a href="#">gi 2576416</a>    | 103233 | 158   | origin recognition complex subunit 1 [Drosophila melanogaster]            |
| 3. <a href="#">gi 18858175</a>   | 58027  | 51    | CG7033-PA, isoform A [Drosophila melanogaster]                            |
| 4. <a href="#">gi 24640724</a>   | 57767  | 45    | CG7033-PB, isoform B [Drosophila melanogaster]                            |
| 5. <a href="#">gi 125810214</a>  | 103475 | 40    | GA10479-PA [Drosophila pseudoobscura]                                     |
| 6. <a href="#">gi 17136328</a>   | 44374  | 38    | meiotic from via Salaria 332 CG5303-PA [Drosophila melanogaster]          |
| 7. <a href="#">gi 125775894</a>  | 38343  | 38    | GA11231-PA [Drosophila pseudoobscura]                                     |
| 8. <a href="#">gi 28572961</a>   | 56392  | 37    | CG7718-PA [Drosophila melanogaster]                                       |
| 9. <a href="#">gi 125778456</a>  | 75568  | 37    | GA19806-PA [Drosophila pseudoobscura]                                     |
| 10. <a href="#">gi 125986487</a> | 20539  | 37    | GA18414-PA [Drosophila pseudoobscura]                                     |
| 11. <a href="#">gi 125981859</a> | 57604  | 36    | GA20046-PA [Drosophila pseudoobscura]                                     |
| 12. <a href="#">gi 85725184</a>  | 41233  | 36    | CG4174-PB, isoform B [Drosophila melanogaster]                            |
| 13. <a href="#">gi 125776677</a> | 320654 | 35    | GA10452-PA [Drosophila pseudoobscura]                                     |
| 14. <a href="#">gi 125773325</a> | 43719  | 34    | GA18617-PA [Drosophila pseudoobscura]                                     |
| 15. <a href="#">gi 125773639</a> | 263763 | 33    | GA18916-PA [Drosophila pseudoobscura]                                     |
| 16. <a href="#">gi 21358017</a>  | 35026  | 32    | CG11837-PA [Drosophila melanogaster]                                      |
| 17. <a href="#">gi 24581278</a>  | 24830  | 31    | Peroxiredoxin 6005 CG3083-PA [Drosophila melanogaster]                    |
| 18. <a href="#">gi 24658952</a>  | 26800  | 31    | CG9897-PA [Drosophila melanogaster]                                       |
| 19. <a href="#">gi 49066183</a>  | 13716  | 30    | ACP53C14C [Drosophila simulans]                                           |
| 20. <a href="#">gi 125979875</a> | 59422  | 30    | GA18684-PA [Drosophila pseudoobscura]                                     |

## Results List

1. [gi|17137456](#) Mass: 103217 Score: **158** Expect: 7.6e-012 Queries matched: 29

Origin recognition complex subunit 1 CG10667-PA [Drosophila melanogaster]

| Observed                                                                                                                                                                                                                                                                            | Mr (expt) | Mr (calc) | ppm    | Start | End   | Miss | Peptide                                    |
|-------------------------------------------------------------------------------------------------------------------------------------------------------------------------------------------------------------------------------------------------------------------------------------|-----------|-----------|--------|-------|-------|------|--------------------------------------------|
| 847.46                                                                                                                                                                                                                                                                              | 846.45    | 846.47    | -27.88 | 614   | - 620 | 1    | R.TLQRMALQ                                 |
| 942.56                                                                                                                                                                                                                                                                              | 941.55    | 941.58    | -24.64 | 267   | - 275 | 1    | K.IVGRSVVR.L                               |
| 944.55                                                                                                                                                                                                                                                                              | 943.54    | 943.51    | 30.9   | 315   | - 322 | 0    | R.NLNLSLDR.G                               |
| 954.56                                                                                                                                                                                                                                                                              | 953.55    | 953.53    | 22.2   | 890   | - 897 | 0    | R.LIISEHSR.N                               |
| 961.51                                                                                                                                                                                                                                                                              | 960.50    | 960.48    | 24.3   | 1     | - 8   | 1    | -.MVNKENAR.S                               |
| 1020.53                                                                                                                                                                                                                                                                             | 1019.52   | 1019.53   | -11.16 | 140   | - 148 | 0    | K.CIVLEGTSK.T + Propionamide (C)           |
| 1057.62                                                                                                                                                                                                                                                                             | 1056.61   | 1056.59   | 20.4   | 749   | - 757 | 0    | K.QLQEIVTAR.L                              |
| 1074.62                                                                                                                                                                                                                                                                             | 1073.61   | 1073.57   | 36.2   | 74    | - 81  | 0    | R.ILHMYELR.E                               |
| 1090.60                                                                                                                                                                                                                                                                             | 1089.59   | 1089.56   | 24.7   | 74    | - 81  | 0    | R.ILHMYELR.E + Oxidation (M)               |
| 1120.64                                                                                                                                                                                                                                                                             | 1119.63   | 1119.57   | 52.5   | 740   | - 748 | 0    | R.LTFQPYSHK.Q                              |
| 1295.76                                                                                                                                                                                                                                                                             | 1294.75   | 1294.70   | 40.6   | 443   | - 453 | 0    | R.SIHLSNIVEQR.V                            |
| 1368.76                                                                                                                                                                                                                                                                             | 1367.75   | 1367.71   | 31.7   | 16    | - 27  | 0    | K.WIGSQDELPPVK.N                           |
| 1392.74                                                                                                                                                                                                                                                                             | 1391.73   | 1391.68   | 35.2   | 454   | - 465 | 0    | R.VFEDDEIISTPK.R                           |
| 1410.81                                                                                                                                                                                                                                                                             | 1409.80   | 1409.72   | 58.2   | 162   | - 173 | 1    | K.LKSTACPMFVSR.Y + Propionamide (C)        |
| 1459.77                                                                                                                                                                                                                                                                             | 1458.77   | 1458.70   | 44.0   | 574   | - 585 | 0    | R.EFENIYAFLEGG.I                           |
| 1511.85                                                                                                                                                                                                                                                                             | 1510.84   | 1510.78   | 42.8   | 655   | - 667 | 0    | K.TVSWEQAHALLEK.R                          |
| 1590.91                                                                                                                                                                                                                                                                             | 1589.90   | 1589.81   | 56.6   | 694   | - 706 | 0    | R.QDVVYNLLDWPTK.S                          |
| 1671.01                                                                                                                                                                                                                                                                             | 1670.00   | 1669.91   | 55.3   | 711   | - 725 | 0    | K.LVVVTIANTMDLPER.L                        |
| 1687.00                                                                                                                                                                                                                                                                             | 1686.00   | 1685.90   | 55.9   | 711   | - 725 | 0    | K.LVVVTIANTMDLPER.L + Oxidation (M)        |
| 1713.04                                                                                                                                                                                                                                                                             | 1712.03   | 1711.93   | 61.9   | 904   | - 918 | 0    | K.ILLNVSADDIHYALR.V                        |
| 1719.99                                                                                                                                                                                                                                                                             | 1718.99   | 1718.90   | 48.9   | 832   | - 846 | 0    | R.MEQIFLQAIAAEVTR.T                        |
| 1736.00                                                                                                                                                                                                                                                                             | 1734.99   | 1734.90   | 53.4   | 832   | - 846 | 0    | R.MEQIFLQAIAAEVTR.T + Oxidation (M)        |
| 1744.95                                                                                                                                                                                                                                                                             | 1743.94   | 1743.85   | 54.0   | 572   | - 585 | 1    | R.EREFENIYAFLEGG.I                         |
| 1747.00                                                                                                                                                                                                                                                                             | 1745.99   | 1745.91   | 46.8   | 693   | - 706 | 1    | R.RQDVVYNLLDWPTK.S                         |
| 1762.03                                                                                                                                                                                                                                                                             | 1761.03   | 1760.94   | 48.5   | 758   | - 774 | 1    | R.LGGSETFKGEAVQLVAR.K                      |
| 1887.10                                                                                                                                                                                                                                                                             | 1886.09   | 1886.02   | 37.2   | 677   | - 692 | 0    | R.VTTVLLVDELDELILCNR.R + Propionamide (C)  |
| 2241.33                                                                                                                                                                                                                                                                             | 2240.32   | 2240.19   | 58.4   | 185   | - 203 | 0    | R.LIPLEIHLEQPEDNARPTR.S                    |
| 2469.34                                                                                                                                                                                                                                                                             | 2468.33   | 2468.19   | 58.7   | 366   | - 388 | 0    | R.LASMDVDPLSLEAVQEPNAQGR.K                 |
| 2485.33                                                                                                                                                                                                                                                                             | 2484.33   | 2484.18   | 59.4   | 366   | - 388 | 0    | R.LASMDVDPLSLEAVQEPNAQGR.K + Oxidation (M) |
| <b>No match to:</b> 829.46, 835.46, 901.50, 936.51, 1058.58, 1111.60, 1137.62, 1143.60, 1202.64, 1318.81, 1329.66, 1399.77, 1420.83, 1433.78, 1840.01, 1903.08, 1925.01, 2163.18, 2193.13, 2230.32, 2273.29, 2284.30, 2298.31, 2550.37, 2780.09, 2780.57, 2809.47, 3211.66, 3338.94 |           |           |        |       |       |      |                                            |

2. [gi|2576416](#) Mass: 103233 Score: **158** Expect: 7.6e-012 Queries matched: 29

origin recognition complex subunit 1 [Drosophila melanogaster]

| Observed | Mr (expt) | Mr (calc) | ppm    | Start | End   | Miss | Peptide                          |
|----------|-----------|-----------|--------|-------|-------|------|----------------------------------|
| 847.46   | 846.45    | 846.47    | -27.88 | 614   | - 620 | 1    | R.TLQRMALQ                       |
| 942.56   | 941.55    | 941.58    | -24.64 | 267   | - 275 | 1    | K.IVGRSVVR.L                     |
| 944.55   | 943.54    | 943.51    | 30.9   | 315   | - 322 | 0    | R.NLNLSLDR.G                     |
| 954.56   | 953.55    | 953.53    | 22.2   | 890   | - 897 | 0    | R.LIISEHSR.N                     |
| 961.51   | 960.50    | 960.48    | 24.3   | 1     | - 8   | 1    | -.MVNKENAR.S                     |
| 1020.53  | 1019.52   | 1019.53   | -11.16 | 140   | - 148 | 0    | K.CIVLEGTSK.T + Propionamide (C) |
| 1057.62  | 1056.61   | 1056.59   | 20.4   | 749   | - 757 | 0    | K.QLQEIVTAR.L                    |
| 1074.62  | 1073.61   | 1073.57   | 36.2   | 74    | - 81  | 0    | R.ILHMYELR.E                     |
| 1090.60  | 1089.59   | 1089.56   | 24.7   | 74    | - 81  | 0    | R.ILHMYELR.E + Oxidation (M)     |

|         |         |         |      |     |   |     |   |                                            |
|---------|---------|---------|------|-----|---|-----|---|--------------------------------------------|
| 1120.64 | 1119.63 | 1119.57 | 52.5 | 740 | - | 748 | 0 | R.LTFQPYSHK.Q                              |
| 1295.76 | 1294.75 | 1294.70 | 40.6 | 443 | - | 453 | 0 | R.SIHLSNIVEQR.V                            |
| 1368.76 | 1367.75 | 1367.71 | 31.7 | 16  | - | 27  | 0 | K.WIGSQDELPPVK.N                           |
| 1392.74 | 1391.73 | 1391.68 | 35.2 | 454 | - | 465 | 0 | R.VFEDEEIIISTPK.R                          |
| 1410.81 | 1409.80 | 1409.72 | 58.2 | 162 | - | 173 | 1 | K.LKSTACPMFVSR.Y + Propionamide (C)        |
| 1459.77 | 1458.77 | 1458.70 | 44.0 | 574 | - | 585 | 0 | R.EFENIYAFLEGG.I                           |
| 1511.85 | 1510.84 | 1510.78 | 42.8 | 655 | - | 667 | 0 | K.TVSWEQAHALLEK.R                          |
| 1590.91 | 1589.90 | 1589.81 | 56.6 | 694 | - | 706 | 0 | R.QDVVYNLLDWPTK.S                          |
| 1671.01 | 1670.00 | 1669.91 | 55.3 | 711 | - | 725 | 0 | K.LVVVTIANTMDLPER.L                        |
| 1687.00 | 1686.00 | 1685.90 | 55.9 | 711 | - | 725 | 0 | K.LVVVTIANTMDLPER.L + Oxidation (M)        |
| 1713.04 | 1712.03 | 1711.93 | 61.9 | 904 | - | 918 | 0 | K.LLLNVSADDIHYALR.V                        |
| 1719.99 | 1718.99 | 1718.90 | 48.9 | 832 | - | 846 | 0 | R.MEQIFLQAIAAEVTR.T                        |
| 1736.00 | 1734.99 | 1734.90 | 53.4 | 832 | - | 846 | 0 | R.MEQIFLQAIAAEVTR.T + Oxidation (M)        |
| 1744.95 | 1743.94 | 1743.85 | 54.0 | 572 | - | 585 | 1 | R.EREFENIYAFLEGG.I                         |
| 1747.00 | 1745.99 | 1745.91 | 46.8 | 693 | - | 706 | 1 | R.RQDVVYNLLDWPTK.S                         |
| 1762.03 | 1761.03 | 1760.94 | 48.5 | 758 | - | 774 | 1 | R.LGGSETFKGEAVQLVAR.K                      |
| 1887.10 | 1886.09 | 1886.02 | 37.2 | 677 | - | 692 | 0 | R.VTTVLLVDELDELICNR.R + Propionamide (C)   |
| 2241.33 | 2240.32 | 2240.19 | 58.4 | 185 | - | 203 | 0 | R.LIPLEIHLEQPEDNARPTR.S                    |
| 2469.34 | 2468.33 | 2468.19 | 58.7 | 366 | - | 388 | 0 | R.LASMDVDPLSLEAVQEPNAQGR.K                 |
| 2485.33 | 2484.33 | 2484.18 | 59.4 | 366 | - | 388 | 0 | R.LASMDVDPLSLEAVQEPNAQGR.K + Oxidation (M) |

**No match to:** 829.46, 835.46, 901.50, 936.51, 1058.58, 1111.60, 1137.62, 1143.60, 1202.64, 1318.81, 1329.66, 1399.77, 1420.83, 1433.78, 1840.01, 1903.08, 1925.01, 2163.18, 2193.13, 2230.32, 2273.29, 2284.30, 2298.31, 2550.37, 2780.09, 2780.57, 2809.47, 3211.66, 3338.94

3. [gi|18858175](#) Mass: 58027 Score: 51 Expect: 0.35 Queries matched: 10

CG7033-PA, isoform A [Drosophila melanogaster]

| Observed | Mr(expt) | Mr(calc) | ppm    | Start | End | Miss | Peptide |                                                   |
|----------|----------|----------|--------|-------|-----|------|---------|---------------------------------------------------|
| 936.51   | 935.51   | 935.46   | 45.1   | 287   | -   | 293  | 0       | K.CNVFINR.Q + Propionamide (C)                    |
| 961.51   | 960.50   | 960.47   | 36.0   | 2     | -   | 9    | 0       | M.EMSLNPVR.V + Oxidation (M)                      |
| 1074.62  | 1073.61  | 1073.59  | 16.5   | 367   | -   | 376  | 0       | K.LGEACTIVIR.G                                    |
| 1090.60  | 1089.59  | 1089.58  | 8.38   | 432   | -   | 441  | 0       | K.EAIAIEAFAR.A                                    |
| 1392.74  | 1391.73  | 1391.79  | -41.26 | 165   | -   | 176  | 1       | R.TTLSSKILHQHK.D                                  |
| 1511.85  | 1510.84  | 1510.82  | 16.4   | 389   | -   | 402  | 0       | R.SLHDALCVLAATVK.E + Propionamide (C)             |
| 1744.95  | 1743.94  | 1743.92  | 12.7   | 474   | -   | 489  | 1       | K.QTLGLDMELGKVADVR.E                              |
| 1903.08  | 1902.07  | 1902.08  | -7.05  | 116   | -   | 131  | 1       | K.LVEQKLHPQIIVSGWR.Q                              |
| 1925.01  | 1924.01  | 1924.02  | -4.94  | 406   | -   | 424  | 1       | R.IIFGGGCSEALMATAVLKK.A + Oxidation (M)           |
| 2809.47  | 2808.46  | 2808.44  | 5.62   | 377   | -   | 402  | 1       | R.GATQQILDEADRSLHDALCVLAATVK.E + Propionamide (C) |

**No match to:** 829.46, 835.46, 847.46, 901.50, 942.56, 944.55, 954.56, 1020.53, 1057.62, 1058.58, 1111.60, 1120.64, 1137.62, 1143.60, 1202.64, 1295.76, 1318.81, 1329.66, 1368.76, 1399.77, 1410.81, 1420.83, 1433.78, 1459.77, 1590.91, 1671.01, 1687.00, 1713.04, 1719.99, 1736.00, 1747.00, 1762.03, 1840.01, 1887.10, 2163.18, 2193.13, 2230.32, 2241.33, 2273.29, 2284.30, 2298.31, 2469.34, 2485.33, 2550.37, 2780.09, 2780.57, 3211.66, 3338.94

4. [gi|24640724](#) Mass: 57767 Score: 45 Expect: 1.5 Queries matched: 9

CG7033-PB, isoform B [Drosophila melanogaster]

| Observed | Mr(expt) | Mr(calc) | ppm    | Start | End | Miss | Peptide |                                                   |
|----------|----------|----------|--------|-------|-----|------|---------|---------------------------------------------------|
| 936.51   | 935.51   | 935.46   | 45.1   | 285   | -   | 291  | 0       | K.CNVFINR.Q + Propionamide (C)                    |
| 1074.62  | 1073.61  | 1073.59  | 16.5   | 365   | -   | 374  | 0       | K.LGEACTIVIR.G                                    |
| 1090.60  | 1089.59  | 1089.58  | 8.38   | 430   | -   | 439  | 0       | K.EAIAIEAFAR.A                                    |
| 1392.74  | 1391.73  | 1391.79  | -41.26 | 163   | -   | 174  | 1       | R.TTLSSKILHQHK.D                                  |
| 1511.85  | 1510.84  | 1510.82  | 16.4   | 387   | -   | 400  | 0       | R.SLHDALCVLAATVK.E + Propionamide (C)             |
| 1744.95  | 1743.94  | 1743.92  | 12.7   | 472   | -   | 487  | 1       | K.QTLGLDMELGKVADVR.E                              |
| 1903.08  | 1902.07  | 1902.08  | -7.05  | 114   | -   | 129  | 1       | K.LVEQKLHPQIIVSGWR.Q                              |
| 1925.01  | 1924.01  | 1924.02  | -4.94  | 404   | -   | 422  | 1       | R.IIFGGGCSEALMATAVLKK.A + Oxidation (M)           |
| 2809.47  | 2808.46  | 2808.44  | 5.62   | 375   | -   | 400  | 1       | R.GATQQILDEADRSLHDALCVLAATVK.E + Propionamide (C) |

**No match to:** 829.46, 835.46, 847.46, 901.50, 942.56, 944.55, 954.56, 961.51, 1020.53, 1057.62, 1058.58, 1111.60, 1120.64, 1137.62, 1143.60, 1202.64, 1295.76, 1318.81, 1329.66, 1368.76, 1399.77, 1410.81, 1420.83, 1433.78, 1459.77, 1590.91, 1671.01, 1687.00, 1713.04, 1719.99, 1736.00, 1747.00, 1762.03, 1840.01, 1887.10, 2163.18, 2193.13, 2230.32, 2241.33, 2273.29, 2284.30, 2298.31, 2469.34, 2485.33, 2550.37, 2780.09, 2780.57, 3211.66, 3338.94

5. [gi|125810214](#) Mass: 103475 Score: 40 Expect: 4.6 Queries matched: 13

GA10479-PA [Drosophila pseudoobscura]

| Observed | Mr(expt) | Mr(calc) | ppm    | Start | End | Miss | Peptide |                                     |
|----------|----------|----------|--------|-------|-----|------|---------|-------------------------------------|
| 942.56   | 941.55   | 941.53   | 26.0   | 775   | -   | 783  | 0       | K.GEAVQLVAR.K                       |
| 944.55   | 943.54   | 943.51   | 30.9   | 323   | -   | 330  | 0       | R.NLNLSLDR.G                        |
| 954.56   | 953.55   | 953.53   | 22.2   | 899   | -   | 906  | 0       | R.LIISEHSR.N                        |
| 1020.53  | 1019.52  | 1019.58  | -57.86 | 735   | -   | 743  | 1       | R.LLMGKVTSR.L + Oxidation (M)       |
| 1057.62  | 1056.61  | 1056.59  | 20.4   | 758   | -   | 766  | 0       | K.QLQEIVTAR.L                       |
| 1392.74  | 1391.73  | 1391.65  | 55.6   | 5     | -   | 15   | 0       | K.ENVISCCQVK.W + 2 Propionamide (C) |

|         |         |         |      |     |   |     |   |                                          |
|---------|---------|---------|------|-----|---|-----|---|------------------------------------------|
| 1590.91 | 1589.90 | 1589.81 | 56.6 | 703 | - | 715 | 0 | R.QDVVYNLLDWPDK.S                        |
| 1671.01 | 1670.00 | 1669.91 | 55.3 | 720 | - | 734 | 0 | R.LVVVTIANTMDLPER.L                      |
| 1687.00 | 1686.00 | 1685.90 | 55.9 | 720 | - | 734 | 0 | R.LVVVTIANTMDLPER.L + Oxidation (M)      |
| 1713.04 | 1712.03 | 1711.93 | 61.9 | 913 | - | 927 | 0 | K.ILLNVSADDIHYALR.V                      |
| 1747.00 | 1745.99 | 1745.91 | 46.8 | 702 | - | 715 | 1 | R.RQDVVYNLLDWPDK.S                       |
| 1887.10 | 1886.09 | 1886.02 | 37.2 | 686 | - | 701 | 0 | R.VTIVLLVDELDELILCNRR + Propionamide (C) |
| 2273.29 | 2272.28 | 2272.14 | 63.4 | 811 | - | 831 | 1 | R.DKCVTMLHVQQALGEMIASAK.V                |

**No match to:** 829.46, 835.46, 847.46, 901.50, 936.51, 961.51, 1058.58, 1074.62, 1090.60, 1111.60, 1120.64, 1137.62, 1143.60, 1202.64, 1295.76, 1318.81, 1329.66, 1368.76, 1399.77, 1410.81, 1420.83, 1433.78, 1459.77, 1511.85, 1719.99, 1736.00, 1744.95, 1762.03, 1840.01, 1903.08, 1925.01, 2163.18, 2193.13, 2230.32, 2241.33, 2284.30, 2298.31, 2469.34, 2485.33, 2550.37, 2780.09, 2780.57, 2809.47, 3211.66, 3338.94

6. [gi|17136328](#) Mass: 44374 Score: 38 Expect: 7.2 Queries matched: 8

meiotic from via Salaria 332 CG5303-PA [Drosophila melanogaster]

| Observed | Mr(expt) | Mr(calc) | ppm    | Start | End | Miss | Peptide |                                        |
|----------|----------|----------|--------|-------|-----|------|---------|----------------------------------------|
| 835.46   | 834.45   | 834.46   | -12.81 | 317   | -   | 324  | 0       | R.SLFNGIGK.M                           |
| 961.51   | 960.50   | 960.51   | -1.89  | 57    | -   | 64   | 0       | R.MENISIVR.S                           |
| 1392.74  | 1391.73  | 1391.69  | 30.1   | 138   | -   | 150  | 0       | R.SSAEVQSEVVTR.I                       |
| 1719.99  | 1718.99  | 1718.89  | 57.8   | 65    | -   | 80   | 0       | R.SLMLSLSLVDSLSLAVR.Q                  |
| 1736.00  | 1734.99  | 1734.88  | 62.1   | 65    | -   | 80   | 0       | R.SLMLSLSLVDSLSLAVR.Q + Oxidation (M)  |
| 1840.01  | 1839.00  | 1839.02  | -8.99  | 248   | -   | 264  | 1       | R.ALREVDTNIPVAVSLSR.G                  |
| 2193.13  | 2192.13  | 2192.11  | 5.84   | 5     | -   | 22   | 1       | K.VEQQYKLLNAELMDQVQK.Q + Oxidation (M) |
| 2469.34  | 2468.33  | 2468.20  | 52.5   | 271   | -   | 293  | 0       | K.GSWLAISVAVEDSPQEPSIQCPRL             |

**No match to:** 829.46, 847.46, 901.50, 936.51, 942.56, 944.55, 954.56, 1020.53, 1057.62, 1058.58, 1074.62, 1090.60, 1111.60, 1120.64, 1137.62, 1143.60, 1202.64, 1295.76, 1318.81, 1329.66, 1368.76, 1399.77, 1410.81, 1420.83, 1433.78, 1459.77, 1511.85, 1590.91, 1671.01, 1687.00, 1713.04, 1744.95, 1747.00, 1762.03, 1887.10, 1903.08, 1925.01, 2163.18, 2230.32, 2241.33, 2273.29, 2284.30, 2298.31, 2485.33, 2550.37, 2780.09, 2780.57, 2809.47, 3211.66, 3338.94

7. [gi|125775894](#) Mass: 38343 Score: 38 Expect: 7.8 Queries matched: 7

GAl1231-PA [Drosophila pseudoobscura]

| Observed | Mr(expt) | Mr(calc) | ppm    | Start | End | Miss | Peptide |                                  |
|----------|----------|----------|--------|-------|-----|------|---------|----------------------------------|
| 961.51   | 960.50   | 960.49   | 17.5   | 77    | -   | 85   | 1       | K.ENKGLSDAK.N                    |
| 1020.53  | 1019.52  | 1019.54  | -22.16 | 27    | -   | 35   | 1       | K.MNIGLSNKK.Q + Oxidation (M)    |
| 1137.62  | 1136.61  | 1136.68  | -59.92 | 318   | -   | 326  | 1       | K.RRPDQKPLK.V                    |
| 1143.60  | 1142.59  | 1142.67  | -68.15 | 219   | -   | 227  | 1       | K.RVKPNFNLR.K                    |
| 1392.74  | 1391.73  | 1391.74  | -9.45  | 22    | -   | 34   | 1       | K.AISTKMNIGLSNKK + Oxidation (M) |
| 1459.77  | 1458.77  | 1458.73  | 23.6   | 294   | -   | 308  | 0       | R.GASRPVAAAGNGFER.V              |
| 2809.47  | 2808.46  | 2808.37  | 32.2   | 86    | -   | 110  | 1       | K.NIVHIPSENNRFGGVDFGNDIPQR.Q     |

**No match to:** 829.46, 835.46, 847.46, 901.50, 936.51, 942.56, 944.55, 954.56, 1057.62, 1058.58, 1074.62, 1090.60, 1111.60, 1120.64, 1202.64, 1295.76, 1318.81, 1329.66, 1368.76, 1399.77, 1410.81, 1420.83, 1433.78, 1511.85, 1590.91, 1671.01, 1687.00, 1713.04, 1719.99, 1736.00, 1744.95, 1747.00, 1762.03, 1840.01, 1887.10, 1903.08, 1925.01, 2163.18, 2193.13, 2230.32, 2241.33, 2273.29, 2284.30, 2298.31, 2469.34, 2485.33, 2550.37, 2780.09, 2780.57, 3211.66, 3338.94

8. [gi|28572961](#) Mass: 56392 Score: 37 Expect: 8.9 Queries matched: 8

CG7718-PA [Drosophila melanogaster]

| Observed | Mr(expt) | Mr(calc) | ppm    | Start | End | Miss | Peptide |                                   |
|----------|----------|----------|--------|-------|-----|------|---------|-----------------------------------|
| 835.46   | 834.45   | 834.45   | -4.97  | 2     | -   | 7    | 1       | M.MPYLRR.L                        |
| 942.56   | 941.55   | 941.57   | -20.54 | 136   | -   | 143  | 0       | K.TMLLPLVR.D                      |
| 1090.60  | 1089.59  | 1089.62  | -25.05 | 118   | -   | 126  | 0       | R.LNVLLDFTR.G                     |
| 1120.64  | 1119.63  | 1119.57  | 53.1   | 312   | -   | 321  | 0       | R.LLSNCLSGSR.L + Propionamide (C) |
| 1368.76  | 1367.75  | 1367.70  | 36.5   | 171   | -   | 181  | 0       | R.WNELLGLQHMK.V                   |
| 1399.77  | 1398.76  | 1398.79  | -18.06 | 364   | -   | 378  | 0       | K.GPAGGIPAAAYTLIAK.S              |
| 1433.78  | 1432.77  | 1432.72  | 31.4   | 438   | -   | 450  | 0       | R.DLETQVCLVTANK.D                 |
| 1903.08  | 1902.07  | 1902.03  | 21.4   | 166   | -   | 181  | 1       | R.LAPPRWNELLGLQHMK.V              |

**No match to:** 829.46, 847.46, 901.50, 936.51, 944.55, 954.56, 961.51, 1020.53, 1057.62, 1058.58, 1074.62, 1111.60, 1137.62, 1143.60, 1202.64, 1295.76, 1318.81, 1329.66, 1392.74, 1410.81, 1420.83, 1459.77, 1511.85, 1590.91, 1671.01, 1687.00, 1713.04, 1719.99, 1736.00, 1744.95, 1747.00, 1762.03, 1840.01, 1887.10, 1903.08, 2163.18, 2193.13, 2230.32, 2241.33, 2273.29, 2284.30, 2298.31, 2469.34, 2485.33, 2550.37, 2780.09, 2780.57, 2809.47, 3211.66, 3338.94

9. [gi|125778456](#) Mass: 75568 Score: 37 Expect: 10 Queries matched: 9

GAl9806-PA [Drosophila pseudoobscura]

| Observed | Mr(expt) | Mr(calc) | ppm    | Start | End | Miss | Peptide |                                 |
|----------|----------|----------|--------|-------|-----|------|---------|---------------------------------|
| 835.46   | 834.45   | 834.47   | -26.25 | 131   | -   | 136  | 1       | K.LYREVR.I                      |
| 901.50   | 900.50   | 900.54   | -50.71 | 318   | -   | 325  | 0       | K.FLVLPNAK.R                    |
| 936.51   | 935.51   | 935.44   | 69.3   | 503   | -   | 510  | 1       | R.SENSSRTR.S                    |
| 1020.53  | 1019.52  | 1019.49  | 26.5   | 627   | -   | 635  | 0       | R.ATFHFGQGR.S                   |
| 1057.62  | 1056.61  | 1056.64  | -28.50 | 318   | -   | 326  | 1       | K.FLVLPNAKR.T                   |
| 1120.64  | 1119.63  | 1119.59  | 33.7   | 149   | -   | 157  | 0       | R.LFQVIESER.S                   |
| 1329.66  | 1328.65  | 1328.64  | 7.74   | 353   | -   | 363  | 0       | R.EKPMELQDPAR.V + Oxidation (M) |

2809.47 2808.46 2808.27 69.0 62 - 88 1 K.DVGDGMTSGSDLKFQSYVNGNGVYK.I  
 3211.66 3210.65 3210.65 1.49 260 - 290 0 K.YAGPEVDAWSLGVVLYTLVSGSLPFDGGTLK.E  
**No match to:** 829.46, 847.46, 942.56, 944.55, 954.56, 961.51, 1058.58, 1074.62, 1090.60, 1111.60, 1137.62, 1143.60, 1202.64, 1295.76, 1318.81, 1368.76, 1392.74, 1399.77, 1410.81, 1420.83, 1433.78, 1459.77, 1511.85, 1590.91, 1671.01, 1687.00, 1713.04, 1719.99, 1736.00, 1744.95, 1747.00, 1762.03, 1840.01, 1887.10, 1903.08, 1925.01, 2163.18, 2193.13, 2230.32, 2241.33, 2273.29, 2284.30, 2298.31, 2469.34, 2485.33, 2550.37, 2780.09, 2780.57, 3338.94

10. [gi|125986487](#) Mass: 20539 Score: 37 Expect: 10 Queries matched: 5

GA18414-PA [Drosophila pseudoobscura]

| Observed | Mr(expt) | Mr(calc) | ppm   | Start | End | Miss | Peptide                                          |
|----------|----------|----------|-------|-------|-----|------|--------------------------------------------------|
| 936.51   | 935.51   | 935.51   | -0.77 | 174   | -   | 180  | 1 K.VERIEYK.K                                    |
| 1143.60  | 1142.59  | 1142.58  | 8.73  | 15    | -   | 23   | 1 R.CSSLPYKFK.K + Propionamide (C)               |
| 1420.83  | 1419.82  | 1419.77  | 38.5  | 31    | -   | 43   | 0 R.IHHILATGNICTK.E                              |
| 2273.29  | 2272.28  | 2272.24  | 19.5  | 74    | -   | 93   | 1 K.VVTVGQFRIGLCHGHQVVPR.G + Propionamide (C)    |
| 2550.37  | 2549.36  | 2549.36  | -1.43 | 82    | -   | 104  | 1 R.IGLCHGHQVVPRGDPEALALIQR.Q + Propionamide (C) |

**No match to:** 829.46, 835.46, 847.46, 901.50, 942.56, 944.55, 954.56, 961.51, 1020.53, 1057.62, 1058.58, 1074.62, 1090.60, 1111.60, 1120.64, 1137.62, 1202.64, 1295.76, 1318.81, 1329.66, 1368.76, 1392.74, 1399.77, 1410.81, 1433.78, 1459.77, 1511.85, 1590.91, 1671.01, 1687.00, 1713.04, 1719.99, 1736.00, 1744.95, 1747.00, 1762.03, 1840.01, 1887.10, 1903.08, 1925.01, 2163.18, 2193.13, 2230.32, 2241.33, 2284.30, 2298.31, 2469.34, 2485.33, 2780.09, 2780.57, 2809.47, 3211.66, 3338.94

11. [gi|125981859](#) Mass: 57604 Score: 36 Expect: 11 Queries matched: 8

GA20046-PA [Drosophila pseudoobscura]

| Observed | Mr(expt) | Mr(calc) | ppm    | Start | End | Miss | Peptide                                             |
|----------|----------|----------|--------|-------|-----|------|-----------------------------------------------------|
| 936.51   | 935.51   | 935.46   | 45.1   | 285   | -   | 291  | 0 K.CNVFINR.Q + Propionamide (C)                    |
| 1074.62  | 1073.61  | 1073.59  | 16.5   | 365   | -   | 374  | 0 K.LGEACTIVIR.G                                    |
| 1392.74  | 1391.73  | 1391.79  | -41.26 | 163   | -   | 174  | 1 R.TTLSSKILHQHK.E                                  |
| 1511.85  | 1510.84  | 1510.82  | 16.4   | 387   | -   | 400  | 0 R.SLHDALCVLAATVK.E + Propionamide (C)             |
| 1887.10  | 1886.09  | 1885.98  | 56.5   | 230   | -   | 246  | 1 R.IENAKILIANTPMDDTK.I                             |
| 1903.08  | 1902.07  | 1902.08  | -7.05  | 114   | -   | 129  | 1 K.LVEQKLHPQIIVSGWR.M                              |
| 2163.18  | 2162.17  | 2162.06  | 50.9   | 341   | -   | 359  | 0 K.LGECDVIEQIMIGEDTLR.F + Oxidation (M)            |
| 2809.47  | 2808.46  | 2808.44  | 5.62   | 375   | -   | 400  | 1 R.GATQQILDEADRSLHDALCVLAATVK.E + Propionamide (C) |

**No match to:** 829.46, 835.46, 847.46, 901.50, 942.56, 944.55, 954.56, 961.51, 1020.53, 1057.62, 1058.58, 1090.60, 1111.60, 1120.64, 1137.62, 1143.60, 1202.64, 1295.76, 1318.81, 1329.66, 1368.76, 1399.77, 1410.81, 1420.83, 1433.78, 1459.77, 1590.91, 1671.01, 1687.00, 1713.04, 1719.99, 1736.00, 1744.95, 1747.00, 1762.03, 1840.01, 1925.01, 2193.13, 2230.32, 2241.33, 2273.29, 2284.30, 2298.31, 2469.34, 2485.33, 2550.37, 2780.09, 2780.57, 3211.66, 3338.94

12. [gi|85725184](#) Mass: 41233 Score: 36 Expect: 13 Queries matched: 7

CG4174-PB, isoform B [Drosophila melanogaster]

| Observed | Mr(expt) | Mr(calc) | ppm    | Start | End | Miss | Peptide                                  |
|----------|----------|----------|--------|-------|-----|------|------------------------------------------|
| 961.51   | 960.50   | 960.50   | 1.59   | 308   | -   | 316  | 0 K.GGEIVFPSR.H                          |
| 1410.81  | 1409.80  | 1409.76  | 25.1   | 242   | -   | 254  | 0 K.IGNLSTSLHDVVR.K                      |
| 1459.77  | 1458.77  | 1458.80  | -23.60 | 38    | -   | 49   | 0 R.FSLNMLIHISIR.N + Oxidation (M)       |
| 1713.04  | 1712.03  | 1711.99  | 23.2   | 36    | -   | 49   | 1 R.LRFSLNMLIHISIR.N                     |
| 1744.95  | 1743.94  | 1743.94  | -0.58  | 292   | -   | 307  | 1 K.IHNKANAFIFLSNAGK.G                   |
| 1903.08  | 1902.07  | 1901.99  | 43.0   | 96    | -   | 111  | 0 K.LWNYPNLLESLSVEANK.G                  |
| 2163.18  | 2162.17  | 2162.03  | 67.0   | 50    | -   | 67   | 0 R.NWSADECLMLGLMYLFLK.D + Oxidation (M) |

**No match to:** 829.46, 835.46, 847.46, 901.50, 936.51, 942.56, 944.55, 954.56, 1020.53, 1057.62, 1058.58, 1074.62, 1090.60, 1111.60, 1120.64, 1137.62, 1143.60, 1202.64, 1295.76, 1318.81, 1329.66, 1368.76, 1392.74, 1399.77, 1420.83, 1433.78, 1511.85, 1590.91, 1671.01, 1687.00, 1719.99, 1736.00, 1747.00, 1762.03, 1840.01, 1887.10, 1925.01, 2193.13, 2230.32, 2241.33, 2273.29, 2284.30, 2298.31, 2469.34, 2485.33, 2550.37, 2780.09, 2780.57, 2809.47, 3211.66, 3338.94

13. [gi|125776677](#) Mass: 320654 Score: 35 Expect: 15 Queries matched: 20

GA10452-PA [Drosophila pseudoobscura]

| Observed | Mr(expt) | Mr(calc) | ppm    | Start | End | Miss | Peptide                                             |
|----------|----------|----------|--------|-------|-----|------|-----------------------------------------------------|
| 835.46   | 834.45   | 834.49   | -42.97 | 928   | -   | 934  | 0 K.LTFEVVK.L                                       |
| 936.51   | 935.51   | 935.51   | -4.39  | 1018  | -   | 1025 | 1 R.KSVSQLMK.E + Oxidation (M)                      |
| 942.56   | 941.55   | 941.58   | -27.46 | 821   | -   | 828  | 0 R.LDIDLILK.C                                      |
| 944.55   | 943.54   | 943.48   | 57.4   | 1925  | -   | 1931 | 1 K.VVFEKMK.D + Oxidation (M)                       |
| 1020.53  | 1019.52  | 1019.51  | 9.57   | 226   | -   | 233  | 0 K.ISLFMEHK.E + Oxidation (M)                      |
| 1057.62  | 1056.61  | 1056.63  | -14.05 | 2321  | -   | 2329 | 1 K.IKILNTAER.D                                     |
| 1058.58  | 1057.57  | 1057.60  | -25.88 | 687   | -   | 695  | 0 K.DILIIETQVK.A                                    |
| 1090.60  | 1089.59  | 1089.61  | -15.96 | 264   | -   | 271  | 1 K.KQYHVFLR.T                                      |
| 1111.60  | 1110.59  | 1110.53  | 55.3   | 1026  | -   | 1034 | 0 K.EYPLVMDTK.L + Oxidation (M)                     |
| 1143.60  | 1142.59  | 1142.52  | 59.6   | 2717  | -   | 2726 | 0 K.TTCFVCSLNR.S                                    |
| 1392.74  | 1391.73  | 1391.67  | 42.2   | 58    | -   | 68   | 1 R.DCLIKICPMNR.Y + Oxidation (M); Propionamide (C) |
| 1420.83  | 1419.82  | 1419.77  | 33.9   | 173   | -   | 185  | 1 K.LRSIGDYVVVGDK.V                                 |
| 1459.77  | 1458.77  | 1458.74  | 21.8   | 559   | -   | 571  | 1 R.LEDELGDPKNAPYK.N                                |
| 1713.04  | 1712.03  | 1712.06  | -16.56 | 1035  | -   | 1048 | 1 K.LKIIIEILQFILDVR.L                               |
| 1744.95  | 1743.94  | 1743.90  | 24.0   | 1392  | -   | 1405 | 0 K.VVQHFVHCIEIHGR.H + Propionamide (C)             |



|         |         |         |        |      |   |      |   |                                                            |
|---------|---------|---------|--------|------|---|------|---|------------------------------------------------------------|
| 1840.01 | 1839.00 | 1838.94 | 36.2   | 2712 | - | 2726 | 1 | K.EAILKTTTCFVCSLNR.S + 2 Propionamide (C)                  |
| 1925.01 | 1924.01 | 1923.91 | 51.1   | 1627 | - | 1641 | 1 | K.WMSLADRFNVENCIR.T + Propionamide (C)                     |
| 2469.34 | 2468.33 | 2468.20 | 52.7   | 821  | - | 840  | 1 | R.LDIDLILKCMSDETMPYELR.A + Propionamide (C)                |
| 2485.33 | 2484.33 | 2484.19 | 53.4   | 821  | - | 840  | 1 | R.LDIDLILKCMSDETMPYELR.A + Oxidation (M); Propionamide (C) |
| 2809.47 | 2808.46 | 2808.54 | -29.24 | 2805 | - | 2828 | 1 | R.SMQTQLLETQLLIKNLSTQLHELK.D                               |

**No match to:** 829.46, 847.46, 901.50, 954.56, 961.51, 1074.62, 1120.64, 1137.62, 1202.64, 1295.76, 1318.81, 1329.66, 1368.76, 1399.77, 1410.81, 1433.78, 1511.85, 1590.91, 1671.01, 1687.00, 1719.99, 1736.00, 1747.00, 1762.03, 1887.10, 1903.08, 2163.18, 2193.13, 2230.32, 2241.33, 2273.29, 2284.30, 2298.31, 2550.37, 2780.09, 2780.57, 3211.66, 3338.94

14. [gi|125773325](#) Mass: 43719 Score: 34 Expect: 18 Queries matched: 7

GA18617-PA [Drosophila pseudoobscura]

| Observed | Mr(expt) | Mr(calc) | ppm  | Start | End | Miss | Peptide |                                            |
|----------|----------|----------|------|-------|-----|------|---------|--------------------------------------------|
| 944.55   | 943.54   | 943.49   | 54.7 | 386   | -   | 393  | 0       | K.LPDTEELK.L                               |
| 1057.62  | 1056.61  | 1056.61  | 2.75 | 63    | -   | 71   | 0       | K.GMIILNRPK.A + Oxidation (M)              |
| 1202.64  | 1201.63  | 1201.58  | 42.2 | 116   | -   | 127  | 0       | R.ALVDAGPTDESK.S                           |
| 1511.85  | 1510.84  | 1510.76  | 57.5 | 301   | -   | 314  | 1       | K.TLATLCKMSPTSMK.V                         |
| 1719.99  | 1718.99  | 1718.92  | 37.8 | 2     | -   | 15   | 1       | M.QNPIQRLLVYTFGQR.T                        |
| 2284.30  | 2283.29  | 2283.23  | 26.9 | 145   | -   | 167  | 0       | K.IPYIAIIDGITMGGVGLSVHGK.Y + Oxidation (M) |
| 2298.31  | 2297.30  | 2297.27  | 11.9 | 63    | -   | 82   | 1       | K.GMIILNRPKALNAINLEMVR.K + 2 Oxidation (M) |

**No match to:** 829.46, 835.46, 847.46, 901.50, 936.51, 942.56, 954.56, 961.51, 1020.53, 1058.58, 1074.62, 1090.60, 1111.60, 1120.64, 1137.62, 1143.60, 1295.76, 1318.81, 1329.66, 1368.76, 1392.74, 1399.77, 1410.81, 1420.83, 1433.78, 1459.77, 1590.91, 1671.01, 1687.00, 1713.04, 1736.00, 1744.95, 1747.00, 1762.03, 1840.01, 1887.10, 1903.08, 1925.01, 2163.18, 2193.13, 2230.32, 2241.33, 2273.29, 2469.34, 2485.33, 2550.37, 2780.09, 2780.57, 2809.47, 3211.66, 3338.94

15. [gi|125773639](#) Mass: 263763 Score: 33 Expect: 23 Queries matched: 17

GA18916-PA [Drosophila pseudoobscura]

| Observed | Mr(expt) | Mr(calc) | ppm    | Start | End | Miss | Peptide |                                             |
|----------|----------|----------|--------|-------|-----|------|---------|---------------------------------------------|
| 901.50   | 900.50   | 900.50   | -5.82  | 38    | -   | 44   | 1       | R.EEVRQIK.H                                 |
| 944.55   | 943.54   | 943.52   | 14.7   | 1736  | -   | 1743 | 1       | K.VALGKWDR.D                                |
| 1057.62  | 1056.61  | 1056.58  | 29.8   | 1823  | -   | 1830 | 1       | R.AIEYLHRR.R                                |
| 1058.58  | 1057.57  | 1057.61  | -36.50 | 62    | -   | 71   | 0       | R.VLLSALGTER.Q                              |
| 1090.60  | 1089.59  | 1089.56  | 27.5   | 1533  | -   | 1541 | 1       | R.MVLCPRCLR.K                               |
| 1120.64  | 1119.63  | 1119.56  | 63.2   | 2234  | -   | 2242 | 1       | R.IENKLDLDCSK.L + Propionamide (C)          |
| 1202.64  | 1201.63  | 1201.58  | 44.5   | 2037  | -   | 2047 | 1       | K.TPENGAQSRSR.S                             |
| 1295.76  | 1294.75  | 1294.69  | 48.2   | 1013  | -   | 1024 | 1       | K.RSPGSHGPPVFR.T                            |
| 1318.81  | 1317.80  | 1317.75  | 38.6   | 929   | -   | 941  | 1       | R.MKLMVVGAGIGK.S + Oxidation (M)            |
| 1671.01  | 1670.00  | 1669.92  | 48.6   | 1119  | -   | 1133 | 1       | K.IGLPRVIDSIEISCR.T                         |
| 1687.00  | 1686.00  | 1685.93  | 42.2   | 1046  | -   | 1059 | 1       | R.SLYLVLWRISDGHK.G                          |
| 1719.99  | 1718.99  | 1718.87  | 68.1   | 891   | -   | 905  | 1       | R.GCLLQEPLRSMIESK.K + Oxidation (M)         |
| 2241.33  | 2240.32  | 2240.18  | 61.6   | 1295  | -   | 1313 | 1       | R.SYIVSLLNKFEVALTWDSR.T                     |
| 2284.30  | 2283.29  | 2283.19  | 42.3   | 2357  | -   | 2375 | 1       | K.SLPPVDVDNHIHCLLWRAK.H + Propionamide (C)  |
| 2469.34  | 2468.33  | 2468.33  | -0.83  | 2098  | -   | 2120 | 1       | K.SAVISLVYMENIARVAVGLHNGR.V                 |
| 2485.33  | 2484.33  | 2484.33  | 0.24   | 2098  | -   | 2120 | 1       | K.SAVISLVYMENIARVAVGLHNGR.V + Oxidation (M) |
| 2809.47  | 2808.46  | 2808.33  | 44.5   | 2329  | -   | 2356 | 1       | R.SLISRYVDSAESNACSAVSTPTHGAAK.S             |

**No match to:** 829.46, 835.46, 847.46, 936.51, 942.56, 954.56, 961.51, 1020.53, 1074.62, 1111.60, 1137.62, 1143.60, 1329.66, 1368.76, 1392.74, 1399.77, 1410.81, 1420.83, 1433.78, 1459.77, 1590.91, 1671.01, 1687.00, 1713.04, 1736.00, 1744.95, 1747.00, 1762.03, 1840.01, 1887.10, 1903.08, 1925.01, 2163.18, 2193.13, 2230.32, 2273.29, 2298.31, 2550.37, 2780.09, 2780.57, 3211.66, 3338.94

16. [gi|21358017](#) Mass: 35026 Score: 32 Expect: 33 Queries matched: 7

CG11837-PA [Drosophila melanogaster]

| Observed | Mr(expt) | Mr(calc) | ppm    | Start | End | Miss | Peptide |                                     |
|----------|----------|----------|--------|-------|-----|------|---------|-------------------------------------|
| 1020.53  | 1019.52  | 1019.55  | -29.43 | 178   | -   | 186  | 1       | R.VDMLMKVGK.N                       |
| 1090.60  | 1089.59  | 1089.55  | 38.7   | 74    | -   | 82   | 0       | K.VIACEIDTR.L + Propionamide (C)    |
| 1137.62  | 1136.61  | 1136.67  | -50.05 | 90    | -   | 99   | 1       | K.RVQATPLQPK.L                      |
| 1433.78  | 1432.77  | 1432.79  | -12.51 | 156   | -   | 167  | 1       | R.LVAKPGDKLYCR.L + Propionamide (C) |
| 1459.77  | 1458.77  | 1458.78  | -10.83 | 151   | -   | 163  | 1       | R.EFAERLVAKPGDK.L                   |
| 1840.01  | 1839.00  | 1838.90  | 59.7   | 206   | -   | 221  | 0       | K.NPPPPVNFTEWDLTR.I                 |
| 2241.33  | 2240.32  | 2240.19  | 56.9   | 45    | -   | 66   | 1       | K.AALRATDVVLEIGPGTGNMTR.M           |

**No match to:** 829.46, 835.46, 847.46, 901.50, 936.51, 942.56, 944.55, 954.56, 961.51, 1057.62, 1058.58, 1074.62, 1111.60, 1120.64, 1143.60, 1202.64, 1295.76, 1318.81, 1329.66, 1368.76, 1392.74, 1399.77, 1410.81, 1420.83, 1511.85, 1590.91, 1671.01, 1687.00, 1713.04, 1719.99, 1736.00, 1744.95, 1747.00, 1762.03, 1887.10, 1903.08, 1925.01, 2163.18, 2193.13, 2230.32, 2273.29, 2284.30, 2298.31, 2469.34, 2485.33, 2550.37, 2780.09, 2780.57, 2809.47, 3211.66, 3338.94

17. [gi|24581278](#) Mass: 24830 Score: 31 Expect: 36 Queries matched: 5

Peroxiredoxin 6005 CG3083-PA [Drosophila melanogaster]

| Observed | Mr(expt) | Mr(calc) | ppm    | Start | End | Miss | Peptide |                                 |
|----------|----------|----------|--------|-------|-----|------|---------|---------------------------------|
| 961.51   | 960.50   | 960.51   | -9.61  | 185   | -   | 192  | 0       | K.CMVLPTVK.A + Propionamide (C) |
| 1020.53  | 1019.52  | 1019.57  | -43.56 | 131   | -   | 139  | 1       | R.AVFVVDDKK.K                   |

1074.62 1073.61 1073.59 19.6 214 - 222 1 K.SYLRLITPQP.-  
 1840.01 1839.00 1838.97 20.5 65 - 81 1 K.RGVKPIALSCDTEVESHK.G  
 1903.08 1902.07 1901.94 68.1 89 - 105 1 K.SFGKLSDFDYPIIADDK.R  
**No match to:** 829.46, 835.46, 847.46, 901.50, 936.51, 942.56, 944.55, 954.56, 1057.62, 1058.58, 1090.60, 1111.60, 1120.64, 1137.62, 1143.60, 1202.64, 1295.76, 1318.81, 1329.66, 1368.76, 1392.74, 1399.77, 1410.81, 1420.83, 1433.78, 1459.77, 1511.85, 1590.91, 1671.01, 1687.00, 1713.04, 1719.99, 1736.00, 1744.95, 1747.00, 1762.03, 1887.10, 1925.01, 2163.18, 2193.13, 2230.32, 2241.33, 2273.29, 2284.30, 2298.31, 2469.34, 2485.33, 2550.37, 2780.09, 2780.57, 2809.47, 3211.66, 3338.94

18. [gi|24658952](#) Mass: 26800 Score: 31 Expect: 38 Queries matched: 5

CG9897-PA [Drosophila melanogaster]

| Observed | Mr(expt) | Mr(calc) | ppm  | Start | End   | Miss | Peptide                                    |
|----------|----------|----------|------|-------|-------|------|--------------------------------------------|
| 942.56   | 941.55   | 941.52   | 37.9 | 206   | - 214 | 0    | R.GSPLVIDNK.L                              |
| 1143.60  | 1142.59  | 1142.54  | 40.7 | 133   | - 142 | 1    | K.VPDDNSRANR.I                             |
| 1744.95  | 1743.94  | 1743.86  | 45.7 | 56    | - 71  | 1    | K.NYILTAAKCVDGYSAR.S                       |
| 1840.01  | 1839.00  | 1838.92  | 44.5 | 77    | - 95  | 1    | R.LGTSSCGTSGSIAGICKVK.V + Propionamide (C) |
| 2469.34  | 2468.33  | 2468.28  | 18.5 | 143   | - 164 | 1    | R.ISSGIEEKCFQLPVQLHGTQVR.I                 |

**No match to:** 829.46, 835.46, 847.46, 901.50, 936.51, 944.55, 954.56, 961.51, 1020.53, 1057.62, 1058.58, 1074.62, 1090.60, 1111.60, 1120.64, 1137.62, 1202.64, 1295.76, 1318.81, 1329.66, 1368.76, 1392.74, 1399.77, 1410.81, 1420.83, 1433.78, 1459.77, 1511.85, 1590.91, 1671.01, 1687.00, 1713.04, 1719.99, 1736.00, 1744.95, 1747.00, 1762.03, 1887.10, 1903.08, 1925.01, 2163.18, 2193.13, 2230.32, 2241.33, 2273.29, 2284.30, 2298.31, 2485.33, 2550.37, 2780.09, 2780.57, 2809.47, 3211.66, 3338.94

19. [gi|49066183](#) Mass: 13716 Score: 30 Expect: 45 Queries matched: 4

ACP53C14C [Drosophila simulans]

| Observed | Mr(expt) | Mr(calc) | ppm    | Start | End   | Miss | Peptide                                          |
|----------|----------|----------|--------|-------|-------|------|--------------------------------------------------|
| 829.46   | 828.45   | 828.49   | -46.99 | 52    | - 58  | 1    | R.AIPCVKK.L + Propionamide (C)                   |
| 1137.62  | 1136.61  | 1136.54  | 62.8   | 34    | - 43  | 0    | R.LSECTESGLK.V + Propionamide (C)                |
| 1202.64  | 1201.63  | 1201.60  | 26.7   | 114   | - 124 | 0    | K.LISENCVPLS.- + Propionamide (C)                |
| 3211.66  | 3210.65  | 3210.76  | -33.53 | 1     | - 28  | 1    | -.MKSNQVYYIALSLILLGFLLPNEVESLK.V + Oxidation (M) |

**No match to:** 835.46, 847.46, 901.50, 936.51, 942.56, 944.55, 954.56, 961.51, 1020.53, 1057.62, 1058.58, 1074.62, 1090.60, 1111.60, 1120.64, 1143.60, 1295.76, 1318.81, 1329.66, 1368.76, 1392.74, 1399.77, 1410.81, 1420.83, 1433.78, 1459.77, 1511.85, 1590.91, 1671.01, 1687.00, 1713.04, 1719.99, 1736.00, 1744.95, 1747.00, 1762.03, 1840.01, 1887.10, 1903.08, 1925.01, 2163.18, 2193.13, 2230.32, 2241.33, 2273.29, 2284.30, 2298.31, 2469.34, 2485.33, 2550.37, 2780.09, 2780.57, 2809.47, 3338.94

20. [gi|125979875](#) Mass: 59422 Score: 30 Expect: 47 Queries matched: 8

GA18684-PA [Drosophila pseudoobscura]

| Observed | Mr(expt) | Mr(calc) | ppm    | Start | End   | Miss | Peptide                                        |
|----------|----------|----------|--------|-------|-------|------|------------------------------------------------|
| 847.46   | 846.45   | 846.42   | 32.3   | 478   | - 484 | 0    | R.FEPIGER.Q                                    |
| 942.56   | 941.55   | 941.51   | 44.8   | 467   | - 474 | 0    | K.SVMAHLLR.S + Oxidation (M)                   |
| 1143.60  | 1142.59  | 1142.61  | -16.66 | 210   | - 218 | 0    | R.EVLHVIDYR.L                                  |
| 1202.64  | 1201.63  | 1201.65  | -10.11 | 478   | - 487 | 1    | R.FEPIGERQVK.M                                 |
| 1399.77  | 1398.76  | 1398.72  | 28.7   | 133   | - 144 | 0    | K.TLTPAFNYTMIK.Q                               |
| 2284.30  | 2283.29  | 2283.15  | 59.9   | 488   | - 505 | 1    | K.MKLNFFVTLHTVEFYCR.V + Propionamide (C)       |
| 2780.57  | 2779.56  | 2779.61  | -19.03 | 1     | - 23  | 0    | -.VWVLGLCLLLIVLSLYLLYAFER.Q + Propionamide (C) |
| 2809.47  | 2808.46  | 2808.59  | -46.91 | 27    | - 51  | 1    | R.IDRLTHNWPAPPSLPILGHLHILAK.L                  |

**No match to:** 829.46, 835.46, 901.50, 936.51, 944.55, 954.56, 961.51, 1020.53, 1057.62, 1058.58, 1074.62, 1090.60, 1111.60, 1120.64, 1137.62, 1295.76, 1318.81, 1329.66, 1368.76, 1392.74, 1410.81, 1420.83, 1433.78, 1459.77, 1511.85, 1590.91, 1671.01, 1687.00, 1713.04, 1719.99, 1736.00, 1744.95, 1747.00, 1762.03, 1840.01, 1887.10, 1903.08, 1925.01, 2163.18, 2193.13, 2230.32, 2241.33, 2273.29, 2298.31, 2469.34, 2485.33, 2550.37, 2780.09, 3211.66, 3338.94

## Search Parameters

Type of search : Peptide Mass Fingerprint  
 Enzyme : Trypsin  
 Variable modifications : Oxidation (M), Propionamide (C)  
 Mass values : Monoisotopic  
 Protein Mass : Unrestricted  
 Peptide Mass Tolerance : ± 70 ppm  
 Peptide Charge State : 1+  
 Max Missed Cleavages : 1  
 Number of queries : 58

Mascot: <http://www.matrixscience.com/>

# Mascot Search Results

**User** : Ilya  
**Email** : toropygin@rambler.ru  
**Search title** : Submitted from Shidlovsky 080328 II by Mascot Daemon on P4P800SE  
**MS data file** : \\192.168.0.18\data on ultraflex-2\DATA\2008\_Ilya\Shidlovsky\080328\015\0\_K21\1\015\_0\_K21\_1.dar  
**Database** : NCBI nr 20070307 (4984280 sequences; 1723577896 residues)  
**Taxonomy** : Drosophila (fruit flies) (47828 sequences)  
**Timestamp** : 2 Apr 2008 at 20:06:24 GMT  
**Top Score** : 61 for **gi|24642732**, xmas-2 CG32562-PA [Drosophila melanogaster]

## Probability Based Mowse Score

Protein score is  $-10 \cdot \log(P)$ , where P is the probability that the observed match is a random event. Protein scores greater than 59 are significant ( $p < 0.05$ ).

Score Distribution



## Protein Summary Report

|                           |                      |
|---------------------------|----------------------|
| Protein Summary           | <a href="#">Help</a> |
| Significance threshold p< | Max. number of hits  |

## Overview Table

Click on column header to jump to entry in results list.  
 Move mouse over any indicator to highlight identical peptides.  
 Click on an indicator to see details of individual match.  
 Use check boxes to select sub-set of queries for new search.

Mouse over:

| Hit:                         | 1 | 2 | 3 | 4 | 5 | 6 | 7 | 8 | 9 | 10 | 11 | 12 | 13 | 14 | 15 | 16 | 17 | 18 | 19 | 20 |
|------------------------------|---|---|---|---|---|---|---|---|---|----|----|----|----|----|----|----|----|----|----|----|
| <a href="#">1038.69</a> (1+) |   |   |   |   |   |   |   |   |   |    |    |    |    |    |    |    |    |    |    |    |
| <a href="#">1062.66</a> (1+) |   |   |   |   |   |   |   |   |   |    |    |    |    |    |    |    |    |    |    |    |
| <a href="#">1090.65</a> (1+) |   |   |   |   |   |   |   |   |   |    |    |    |    |    |    |    |    |    |    |    |
| <a href="#">1163.69</a> (1+) |   |   |   |   |   |   |   |   |   |    |    |    |    |    |    |    |    |    |    |    |
| <a href="#">1191.69</a> (1+) |   |   |   |   |   |   |   |   |   |    |    |    |    |    |    |    |    |    |    |    |
| <a href="#">1196.65</a> (1+) |   |   |   |   |   |   |   |   |   |    |    |    |    |    |    |    |    |    |    |    |
| <a href="#">1202.66</a> (1+) |   |   |   |   |   |   |   |   |   |    |    |    |    |    |    |    |    |    |    |    |
| <a href="#">1235.74</a> (1+) |   |   |   |   |   |   |   |   |   |    |    |    |    |    |    |    |    |    |    |    |
| <a href="#">1273.73</a> (1+) |   |   |   |   |   |   |   |   |   |    |    |    |    |    |    |    |    |    |    |    |
| <a href="#">1292.79</a> (1+) |   |   |   |   |   |   |   |   |   |    |    |    |    |    |    |    |    |    |    |    |
| <a href="#">1302.72</a> (1+) |   |   |   |   |   |   |   |   |   |    |    |    |    |    |    |    |    |    |    |    |
| <a href="#">1306.80</a> (1+) |   |   |   |   |   |   |   |   |   |    |    |    |    |    |    |    |    |    |    |    |
| <a href="#">1309.74</a> (1+) |   |   |   |   |   |   |   |   |   |    |    |    |    |    |    |    |    |    |    |    |

|                              |   |   |   |   |   |   |   |   |   |   |   |   |   |   |  |  |  |  |  |   |   |   |
|------------------------------|---|---|---|---|---|---|---|---|---|---|---|---|---|---|--|--|--|--|--|---|---|---|
| <a href="#">1363.71</a> (1+) |   |   | ? | ? | ? |   | ? | ? |   |   |   |   |   |   |  |  |  |  |  | ? | ? |   |
| <a href="#">1370.77</a> (1+) |   |   | ? | ? |   |   |   |   |   | ? |   | ? |   |   |  |  |  |  |  |   |   |   |
| <a href="#">1372.80</a> (1+) |   | ? | ? |   |   |   |   |   |   |   |   |   |   |   |  |  |  |  |  | ? |   |   |
| <a href="#">1392.82</a> (1+) |   |   |   | ? |   |   |   |   |   |   |   |   |   |   |  |  |  |  |  |   |   |   |
| <a href="#">1416.78</a> (1+) |   |   |   | ? |   |   |   |   | ? |   |   |   |   |   |  |  |  |  |  |   | ? |   |
| <a href="#">1422.79</a> (1+) | ? | ? |   |   |   |   |   |   |   |   |   |   |   |   |  |  |  |  |  | ? |   |   |
| <a href="#">1424.74</a> (1+) |   |   | ? |   |   |   |   |   |   |   |   |   |   |   |  |  |  |  |  |   |   |   |
| <a href="#">1434.80</a> (1+) |   |   |   | ? | ? |   |   |   |   |   |   |   |   |   |  |  |  |  |  |   | ? |   |
| <a href="#">1436.75</a> (1+) |   |   |   | ? | ? |   |   |   | ? | ? |   |   |   |   |  |  |  |  |  |   |   |   |
| <a href="#">1439.78</a> (1+) |   |   |   |   |   |   |   |   | ? | ? |   |   |   |   |  |  |  |  |  |   |   |   |
| <a href="#">1466.82</a> (1+) |   |   | ? |   |   |   |   |   |   | ? |   |   |   |   |  |  |  |  |  |   |   |   |
| <a href="#">1482.82</a> (1+) |   |   |   | ? |   |   |   |   |   | ? |   |   |   |   |  |  |  |  |  |   |   |   |
| <a href="#">1493.79</a> (1+) |   | ? |   |   | ? |   |   |   |   |   | ? |   |   |   |  |  |  |  |  |   | ? |   |
| <a href="#">1520.84</a> (1+) |   | ? |   | ? |   | ? |   |   |   |   |   |   |   |   |  |  |  |  |  | ? |   | ? |
| <a href="#">1530.85</a> (1+) |   | ? |   |   |   |   |   |   |   |   |   |   |   |   |  |  |  |  |  |   |   |   |
| <a href="#">1532.86</a> (1+) |   |   |   | ? | ? |   | ? |   |   |   |   |   |   |   |  |  |  |  |  |   | ? |   |
| <a href="#">1552.85</a> (1+) | ? |   |   |   | ? |   |   |   |   |   | ? |   | ? | ? |  |  |  |  |  | ? |   | ? |
| <a href="#">1564.83</a> (1+) | ? | ? |   |   | ? |   |   |   |   |   | ? | ? |   | ? |  |  |  |  |  | ? |   |   |
| <a href="#">1572.97</a> (1+) | ? |   |   | ? |   |   |   |   |   |   |   |   |   |   |  |  |  |  |  |   | ? | ? |
| <a href="#">1577.85</a> (1+) | ? |   | ? |   |   |   |   |   |   |   |   |   |   |   |  |  |  |  |  | ? |   | ? |
| <a href="#">1579.81</a> (1+) | ? |   |   |   | ? |   |   |   |   |   |   |   |   |   |  |  |  |  |  |   | ? |   |
| <a href="#">1590.85</a> (1+) | ? |   |   |   | ? |   |   |   |   |   |   |   |   |   |  |  |  |  |  |   |   |   |
| <a href="#">1600.90</a> (1+) |   |   |   | ? |   | ? |   |   |   |   |   |   |   |   |  |  |  |  |  |   |   |   |
| <a href="#">1611.83</a> (1+) |   |   |   | ? |   |   |   |   | ? |   |   |   |   |   |  |  |  |  |  |   |   |   |
| <a href="#">1631.83</a> (1+) | ? | ? |   |   |   |   |   |   |   |   |   |   |   |   |  |  |  |  |  | ? | ? | ? |
| <a href="#">1635.87</a> (1+) |   |   |   | ? |   |   |   |   |   |   |   |   |   |   |  |  |  |  |  |   | ? |   |
| <a href="#">1649.85</a> (1+) | ? |   |   | ? |   | ? |   |   | ? |   |   |   |   |   |  |  |  |  |  |   | ? | ? |
| <a href="#">1655.89</a> (1+) |   |   |   |   | ? |   |   |   |   |   |   |   |   |   |  |  |  |  |  |   |   |   |
| <a href="#">1658.86</a> (1+) |   | ? |   |   |   |   |   |   |   |   |   |   |   |   |  |  |  |  |  | ? | ? | ? |
| <a href="#">1687.91</a> (1+) |   |   |   | ? | ? |   |   |   |   |   |   |   |   |   |  |  |  |  |  |   | ? |   |
| <a href="#">1706.83</a> (1+) |   |   |   | ? | ? | ? | ? |   |   |   |   |   |   |   |  |  |  |  |  |   | ? |   |
| <a href="#">1739.89</a> (1+) |   |   |   |   | ? |   |   |   |   |   |   |   |   |   |  |  |  |  |  |   |   |   |
| <a href="#">1750.91</a> (1+) |   |   |   |   | ? |   |   |   |   |   |   |   |   |   |  |  |  |  |  |   | ? |   |
| <a href="#">1770.90</a> (1+) | ? |   |   |   | ? |   | ? |   |   |   |   |   |   |   |  |  |  |  |  |   | ? |   |
| <a href="#">1775.89</a> (1+) |   |   |   | ? |   | ? |   |   | ? |   |   |   |   |   |  |  |  |  |  |   | ? |   |
| <a href="#">1782.90</a> (1+) |   |   |   | ? |   | ? |   |   |   |   |   |   |   |   |  |  |  |  |  |   | ? | ? |
| <a href="#">1814.00</a> (1+) | ? | ? |   |   | ? |   |   |   |   |   |   |   |   |   |  |  |  |  |  |   | ? |   |
| <a href="#">1842.98</a> (1+) | ? | ? |   |   |   |   |   |   |   |   |   |   |   |   |  |  |  |  |  |   | ? |   |
| <a href="#">1878.94</a> (1+) |   |   |   | ? |   | ? |   |   |   |   |   |   |   |   |  |  |  |  |  |   |   |   |
| <a href="#">1948.97</a> (1+) | ? |   |   |   | ? |   |   |   |   |   |   |   |   |   |  |  |  |  |  |   | ? |   |
| <a href="#">1978.97</a> (1+) |   |   |   | ? |   | ? |   |   |   |   |   |   |   |   |  |  |  |  |  |   | ? |   |
| <a href="#">1988.05</a> (1+) |   | ? |   |   | ? |   |   |   |   |   |   |   |   |   |  |  |  |  |  |   | ? |   |
| <a href="#">2070.01</a> (1+) |   |   |   |   | ? |   |   |   |   |   |   |   |   |   |  |  |  |  |  |   |   |   |
| <a href="#">2075.06</a> (1+) |   |   |   |   |   |   |   |   |   |   |   |   |   |   |  |  |  |  |  |   | ? | ? |
| <a href="#">2084.09</a> (1+) |   | ? | ? |   |   | ? |   |   |   |   |   |   |   |   |  |  |  |  |  |   |   |   |
| <a href="#">2086.05</a> (1+) | ? |   |   |   |   |   |   |   |   |   |   |   |   |   |  |  |  |  |  |   | ? | ? |
| <a href="#">2090.04</a> (1+) |   |   |   |   |   |   |   |   |   |   |   |   |   |   |  |  |  |  |  |   | ? |   |
| <a href="#">2101.09</a> (1+) |   |   |   |   | ? |   |   |   |   |   |   |   |   |   |  |  |  |  |  |   | ? |   |
| <a href="#">2251.10</a> (1+) |   |   |   |   | ? |   |   |   |   |   |   |   |   |   |  |  |  |  |  |   | ? | ? |



|         |         |         |        |     |   |     |   |                                        |
|---------|---------|---------|--------|-----|---|-----|---|----------------------------------------|
| 1631.83 | 1630.82 | 1630.93 | -68.53 | 577 | - | 590 | 0 | R.HKPSATHLPVYLLR.L                     |
| 1658.86 | 1657.86 | 1657.85 | 2.25   | 561 | - | 576 | 0 | R.ISEEGSVESLPSLVGR.H                   |
| 1814.00 | 1813.00 | 1812.88 | 63.8   | 310 | - | 323 | 0 | K.HEVHFLYQDEIVER.L                     |
| 1842.98 | 1841.98 | 1841.97 | 5.24   | 83  | - | 98  | 1 | K.LAKFEDLSQIATFGFR.G                   |
| 1988.05 | 1987.04 | 1986.96 | 41.6   | 344 | - | 361 | 1 | K.QLKLPASDMDQTPVVK.S + Oxidation (M)   |
| 2084.09 | 2083.08 | 2083.17 | -42.16 | 536 | - | 554 | 1 | K.TELVASAVQILQKAPIMK.E + Oxidation (M) |

**No match to:** 1038.69, 1090.65, 1163.69, 1191.69, 1196.65, 1202.66, 1235.74, 1273.73, 1292.79, 1302.72, 1306.80, 1309.74, 1363.71, 1370.77, 1392.82, 1416.78, 1424.74, 1434.80, 1436.75, 1439.78, 1466.82, 1482.82, 1532.86, 1552.85, 1572.97, 1577.85, 1579.81, 1590.85, 1600.90, 1611.83, 1635.87, 1649.85, 1655.89, 1687.91, 1706.83, 1739.89, 1750.91, 1770.90, 1775.89, 1782.90, 1878.94, 1948.97, 1978.97, 2070.01, 2075.06, 2086.05, 2090.04, 2101.09, 2251.10, 2298.15, 2351.11, 2724.38, 2780.43, 2780.92

3. [gi|21428826](#) Mass: 52159 Score: 40 Expect: 4.6 Queries matched: 9

GH06222p [Drosophila melanogaster]

| Observed | Mr(expt) | Mr(calc) | ppm    | Start | End | Miss | Peptide |                                     |
|----------|----------|----------|--------|-------|-----|------|---------|-------------------------------------|
| 1202.66  | 1201.66  | 1201.62  | 32.9   | 43    | -   | 52   | 1       | R.TSNQQNINKR.R                      |
| 1235.74  | 1234.73  | 1234.65  | 66.1   | 217   | -   | 228  | 1       | R.SKSLSSADALTR.G                    |
| 1309.74  | 1308.73  | 1308.66  | 52.4   | 119   | -   | 131  | 0       | R.QAGHSLGNMPLK.A                    |
| 1372.80  | 1371.79  | 1371.73  | 42.2   | 69    | -   | 80   | 0       | R.GKPAMDIYRPPK.L                    |
| 1577.85  | 1576.85  | 1576.80  | 31.6   | 427   | -   | 441  | 1       | R.DAFLNAGESAASIRR.T                 |
| 1635.87  | 1634.86  | 1634.78  | 49.3   | 54    | -   | 68   | 0       | R.SLAFNVPGNQTGQMR.G + Oxidation (M) |
| 1775.89  | 1774.89  | 1774.89  | -1.14  | 53    | -   | 68   | 1       | R.RSLAFNVPGNQTGQMR.G                |
| 1782.90  | 1781.89  | 1781.92  | -16.07 | 265   | -   | 279  | 1       | K.LNSRCLMELTSQFIK.R                 |
| 2084.09  | 2083.08  | 2083.01  | 35.5   | 340   | -   | 356  | 1       | R.FTAFMAFLTEMFCQLKR.R               |

**No match to:** 1038.69, 1062.66, 1090.65, 1163.69, 1191.69, 1196.65, 1273.73, 1292.79, 1302.72, 1306.80, 1363.71, 1370.77, 1392.82, 1416.78, 1422.79, 1424.74, 1434.80, 1436.75, 1439.78, 1466.82, 1482.82, 1493.79, 1520.84, 1530.85, 1532.86, 1552.85, 1564.83, 1572.97, 1579.81, 1590.85, 1600.90, 1611.83, 1631.83, 1649.85, 1655.89, 1658.86, 1687.91, 1706.83, 1739.89, 1750.91, 1770.90, 1814.00, 1842.98, 1878.94, 1948.97, 1978.97, 1988.05, 2070.01, 2075.06, 2086.05, 2090.04, 2101.09, 2251.10, 2298.15, 2351.11, 2724.38, 2780.43, 2780.92

4. [gi|125985555](#) Mass: 153282 Score: 39 Expect: 5.5 Queries matched: 16

GA10974-PA [Drosophila pseudoobscura]

| Observed | Mr(expt) | Mr(calc) | ppm    | Start | End | Miss | Peptide |                                                            |
|----------|----------|----------|--------|-------|-----|------|---------|------------------------------------------------------------|
| 1273.73  | 1272.72  | 1272.66  | 48.5   | 11    | -   | 21   | 0       | R.LAQMTGQQQLR.A                                            |
| 1292.79  | 1291.78  | 1291.70  | 61.8   | 361   | -   | 371  | 1       | R.KEIEAFESLVK.Q                                            |
| 1302.72  | 1301.71  | 1301.63  | 65.2   | 965   | -   | 974  | 1       | R.FQEHKEDLEK.A                                             |
| 1363.71  | 1362.70  | 1362.66  | 34.2   | 558   | -   | 568  | 1       | K.EERNLSVQCSK.L + Propionamide (C)                         |
| 1370.77  | 1369.77  | 1369.72  | 33.3   | 414   | -   | 424  | 1       | K.ELEDLRTLPER.N                                            |
| 1424.74  | 1423.73  | 1423.68  | 36.1   | 1103  | -   | 1114 | 0       | K.EFMDGFALITHK.L + Oxidation (M)                           |
| 1466.82  | 1465.81  | 1465.88  | -43.99 | 72    | -   | 83   | 1       | R.LIIKQIVNHFK.S                                            |
| 1572.97  | 1571.96  | 1571.90  | 35.4   | 999   | -   | 1012 | 0       | K.VEIPAHQAEKPLK.L                                          |
| 1600.90  | 1599.89  | 1599.85  | 23.3   | 11    | -   | 24   | 1       | R.LAQMTGQQQLRAQK.E                                         |
| 1611.83  | 1610.83  | 1610.86  | -23.00 | 202   | -   | 214  | 1       | K.LLKTHHVDLEHNR.F                                          |
| 1649.85  | 1648.84  | 1648.86  | -13.29 | 1103  | -   | 1116 | 1       | K.EFMDGFALITHK.LK.E                                        |
| 1687.91  | 1686.90  | 1686.80  | 59.6   | 670   | -   | 684  | 1       | R.REACSTIDTPENVPR.L                                        |
| 1706.83  | 1705.82  | 1705.74  | 48.3   | 178   | -   | 192  | 0       | R.TAMSDNSSYYQINGR.R                                        |
| 1878.94  | 1877.93  | 1877.83  | 51.1   | 178   | -   | 193  | 1       | R.TAMSDNSSYYQINGRR.A + Oxidation (M)                       |
| 1978.97  | 1977.96  | 1977.89  | 38.1   | 110   | -   | 126  | 1       | K.SNVIDSMFVFGCRANR.I + 2 Oxidation (M)                     |
| 2298.15  | 2297.15  | 2297.06  | 36.5   | 380   | -   | 399  | 1       | K.LVSAERACTEVQSTMENTNK.Q + Oxidation (M); Propionamide (C) |

**No match to:** 1038.69, 1062.66, 1090.65, 1163.69, 1191.69, 1196.65, 1202.66, 1235.74, 1306.80, 1309.74, 1372.80, 1392.82, 1416.78, 1422.79, 1434.80, 1436.75, 1439.78, 1482.82, 1493.79, 1520.84, 1530.85, 1532.86, 1552.85, 1564.83, 1577.85, 1579.81, 1590.85, 1631.83, 1635.87, 1655.89, 1658.86, 1739.89, 1750.91, 1770.90, 1775.89, 1782.90, 1814.00, 1842.98, 1948.97, 1988.05, 2070.01, 2075.06, 2084.09, 2086.05, 2090.04, 2101.09, 2251.10, 2351.11, 2724.38, 2780.43, 2780.92

5. [gi|17136796](#) Mass: 54515 Score: 39 Expect: 6.5 Queries matched: 8

Vacuolar H[+]-ATPase 55kD B subunit CG17369-PB, isoform B [Drosophila melanogaster]

| Observed | Mr(expt) | Mr(calc) | ppm    | Start | End | Miss | Peptide |                                              |
|----------|----------|----------|--------|-------|-----|------|---------|----------------------------------------------|
| 1309.74  | 1308.73  | 1308.65  | 58.4   | 381   | -   | 392  | 1       | R.LMKSALGEGMTR.K + Oxidation (M)             |
| 1520.84  | 1519.83  | 1519.79  | 26.7   | 73    | -   | 87   | 0       | K.AVVQVFEGTSGIDAK.N                          |
| 1532.86  | 1531.85  | 1531.85  | -2.06  | 474   | -   | 486  | 1       | K.RIPASILAEFYPR.D                            |
| 1687.91  | 1686.90  | 1686.94  | -24.71 | 47    | -   | 61   | 1       | K.FAEIVQLRLADGTVR.S                          |
| 1706.83  | 1705.82  | 1705.90  | -45.89 | 2     | -   | 16   | 1       | M.NAQQAQREHVLAVSR.D                          |
| 2251.10  | 2250.09  | 2250.21  | -51.98 | 252   | -   | 271  | 1       | R.IITPRALTAAEFLAYQCEK.H                      |
| 2724.38  | 2723.37  | 2723.27  | 36.5   | 198   | -   | 222  | 0       | K.SVLDDHTDNFAIVFAAMGVNMETAR.F                |
| 2780.43  | 2779.43  | 2779.39  | 13.6   | 143   | -   | 167  | 1       | R.IYPEEMIQTGISALDVMSIARGQK.I + Oxidation (M) |

**No match to:** 1038.69, 1062.66, 1090.65, 1163.69, 1191.69, 1196.65, 1202.66, 1235.74, 1273.73, 1292.79, 1302.72, 1306.80, 1363.71, 1370.77, 1372.80, 1392.82, 1416.78, 1422.79, 1424.74, 1434.80, 1436.75, 1439.78, 1466.82, 1482.82, 1493.79, 1530.85, 1532.86, 1552.85, 1564.83, 1572.97, 1577.85, 1579.81, 1590.85, 1600.90, 1611.83, 1631.83, 1635.87, 1649.85, 1655.89, 1658.86, 1739.89, 1750.91, 1770.90, 1775.89, 1782.90, 1814.00, 1842.98, 1878.94, 1948.97, 1978.97, 1988.05, 2070.01, 2075.06, 2084.09, 2086.05, 2090.04, 2101.09, 2298.15, 2351.11, 2780.92

6. [gi|78706842](#) Mass: 888438 Score: 39 Expect: 6.8 Queries matched: 37

Muscle-specific protein 300 CG33715-PB, isoform B [Drosophila melanogaster]

| Observed | Mr(expt) | Mr(calc) | ppm    | Start | End    | Miss | Peptide                                         |
|----------|----------|----------|--------|-------|--------|------|-------------------------------------------------|
| 1090.65  | 1089.64  | 1089.62  | 23.1   | 3196  | - 3204 | 0    | K.QLFQSIIVQK.S                                  |
| 1163.69  | 1162.68  | 1162.61  | 55.6   | 6962  | - 6971 | 0    | K.IFFGNEAPIR.N                                  |
| 1202.66  | 1201.66  | 1201.63  | 21.4   | 6384  | - 6394 | 1    | K.AELDRALEASK.A                                 |
| 1235.74  | 1234.73  | 1234.66  | 60.1   | 5122  | - 5132 | 0    | R.ISNAIMQLTTK.Y + Oxidation (M)                 |
| 1363.71  | 1362.70  | 1362.71  | -2.72  | 6161  | - 6172 | 1    | K.LESELMDAIAKK.Q + Oxidation (M)                |
| 1370.77  | 1369.77  | 1369.77  | -4.45  | 7615  | - 7625 | 1    | R.LSIEKLELVHFR.N                                |
| 1392.82  | 1391.81  | 1391.77  | 33.3   | 5992  | - 6003 | 0    | K.LEDLLDQKPPPK.T                                |
| 1416.78  | 1415.77  | 1415.74  | 22.6   | 4802  | - 4812 | 1    | K.ELQTEWDRLVK.K                                 |
| 1434.80  | 1433.79  | 1433.71  | 60.3   | 5707  | - 5719 | 1    | K.VAPETKGEISEMK.T + Oxidation (M)               |
| 1436.75  | 1435.75  | 1435.66  | 60.1   | 2752  | - 2763 | 1    | K.AVTLCDESERK.T + Propionamide (C)              |
| 1482.82  | 1481.81  | 1481.80  | 5.82   | 1187  | - 1198 | 1    | R.REVHEVCLLSK.V + Propionamide (C)              |
| 1493.79  | 1492.78  | 1492.80  | -11.53 | 6972  | - 6984 | 1    | R.NLVHKQIQEADK.I                                |
| 1532.86  | 1531.85  | 1531.77  | 53.2   | 5217  | - 5230 | 1    | K.EKVIMNTEQNGAAK.I                              |
| 1552.85  | 1551.84  | 1551.75  | 60.5   | 1727  | - 1738 | 0    | K.LVNFSNWMEQLR.N + Oxidation (M)                |
| 1564.83  | 1563.82  | 1563.74  | 52.4   | 3656  | - 3667 | 1    | K.AQQDYQKNLWDR.L                                |
| 1579.81  | 1578.81  | 1578.80  | 4.49   | 3738  | - 3752 | 1    | K.FGASLSDVKSGLENR.L                             |
| 1590.85  | 1589.84  | 1589.83  | 6.25   | 4635  | - 4647 | 1    | K.NHKLNLCPNLPEK.E + Propionamide (C)            |
| 1600.90  | 1599.89  | 1599.81  | 48.9   | 4902  | - 4917 | 0    | K.ASVLQQGAPGTEISDK.Y                            |
| 1649.85  | 1648.84  | 1648.82  | 11.2   | 6622  | - 6635 | 0    | R.LAECSSQFLGNIQQK.L + Propionamide (C)          |
| 1655.89  | 1654.89  | 1654.88  | 2.30   | 9     | - 21   | 1    | K.TFTNWINSYLLKR.V                               |
| 1706.83  | 1705.82  | 1705.81  | 7.58   | 3753  | - 3765 | 0    | R.LQQWNDYEINLDR.L                               |
| 1739.89  | 1738.89  | 1738.88  | 1.45   | 1199  | - 1214 | 1    | K.VKDQTANIPAPDSLDR.V                            |
| 1750.91  | 1749.90  | 1749.84  | 37.6   | 3813  | - 3828 | 1    | K.VKDDTSELVQSSGETR.I                            |
| 1770.90  | 1769.89  | 1769.89  | -1.83  | 2031  | - 2045 | 1    | K.YNLISQALREYADSK.D                             |
| 1775.89  | 1774.89  | 1774.94  | -26.82 | 6647  | - 6662 | 0    | R.IEDVQDLLGAYEGILK.E                            |
| 1782.90  | 1781.89  | 1781.90  | -6.10  | 451   | - 465  | 1    | K.CCLIAFLNLVENKMR.G + Oxidation (M)             |
| 1814.00  | 1813.00  | 1812.97  | 16.3   | 1448  | - 1464 | 1    | R.MKQLDLLAADASELAPK.E                           |
| 1878.94  | 1877.93  | 1877.87  | 31.6   | 7459  | - 7473 | 0    | R.FMNLVQIVMSWASEK.R + 2 Oxidation (M)           |
| 1948.97  | 1947.96  | 1947.83  | 68.4   | 4307  | - 4323 | 1    | K.LDYCSMSSMSPKELDK.K                            |
| 1978.97  | 1977.96  | 1977.91  | 25.8   | 4794  | - 4809 | 1    | R.DAINTEMKELQTEWDR.L                            |
| 1988.05  | 1987.04  | 1987.10  | -28.60 | 1330  | - 1346 | 1    | K.RDLNVQLQQASHQLLPK.L                           |
| 2070.01  | 2069.00  | 2069.06  | -30.11 | 1419  | - 1436 | 1    | K.NIEALQSEDLTPERVVK.V                           |
| 2084.09  | 2083.08  | 2083.13  | -23.08 | 156   | - 174  | 1    | K.TLLNWTNALPKDSGVEVK.D                          |
| 2101.09  | 2100.08  | 2100.06  | 8.82   | 3344  | - 3361 | 1    | R.SAEAVFREQQQLQSTLHEK.V                         |
| 2298.15  | 2297.15  | 2297.22  | -30.61 | 7046  | - 7065 | 1    | R.TKRVDEPVQNLGLHFNIQK.L                         |
| 2351.11  | 2350.10  | 2350.19  | -36.40 | 4617  | - 4634 | 1    | K.EEYERLMEWLQQIDILVK.N + Oxidation (M)          |
| 2780.43  | 2779.43  | 2779.38  | 16.2   | 2598  | - 2623 | 1    | K.IEFQELARMGSPGSSSATAQQQLQTVK.N + Oxidation (M) |

No match to: 1038.69, 1062.66, 1191.69, 1196.65, 1273.73, 1292.79, 1302.72, 1306.80, 1309.74, 1372.80, 1422.79, 1424.74, 1439.78, 1466.82, 1520.84, 1530.85, 1572.97, 1577.85, 1611.83, 1631.83, 1635.87, 1658.86, 1687.91, 1842.98, 2075.06, 2086.05, 2090.04, 2251.10, 2724.38, 2780.92

7. [gi|41615732](#) Mass: 15450 Score: 38 Expect: 7.4 Queries matched: 6

TPA: TPA\_inf: HDC02496 [Drosophila melanogaster]

| Observed | Mr(expt) | Mr(calc) | ppm    | Start | End   | Miss | Peptide                          |
|----------|----------|----------|--------|-------|-------|------|----------------------------------|
| 1235.74  | 1234.73  | 1234.65  | 68.1   | 28    | - 38  | 0    | R.MGRPSAVFINK.K + Oxidation (M)  |
| 1363.71  | 1362.70  | 1362.74  | -30.42 | 28    | - 39  | 1    | R.MGRPSAVFINKK.K + Oxidation (M) |
| 1434.80  | 1433.79  | 1433.77  | 18.8   | 41    | - 53  | 1    | K.KESPVFFGTGLGPR.Q               |
| 1436.75  | 1435.75  | 1435.71  | 24.1   | 98    | - 110 | 0    | R.ENICISLGDGFGLR.A               |
| 1520.84  | 1519.83  | 1519.78  | 35.0   | 14    | - 26  | 1    | R.HSSHGGNIITRWR.R                |
| 1706.83  | 1705.82  | 1705.88  | -37.05 | 98    | - 113 | 1    | R.ENICISLGDGFGLRAAK.S            |

No match to: 1038.69, 1062.66, 1090.65, 1163.69, 1191.69, 1196.65, 1202.66, 1273.73, 1292.79, 1302.72, 1306.80, 1309.74, 1372.80, 1422.79, 1424.74, 1439.78, 1466.82, 1520.84, 1530.85, 1572.97, 1577.85, 1579.81, 1590.85, 1600.90, 1611.83, 1631.83, 1635.87, 1649.85, 1655.89, 1658.86, 1687.91, 1739.89, 1750.91, 1770.90, 1775.89, 1782.90, 1814.00, 1842.98, 1878.94, 1948.97, 1978.97, 1988.05, 2070.01, 2075.06, 2084.09, 2086.05, 2090.04, 2101.09, 2251.10, 2298.15, 2351.11, 2724.38, 2780.43, 2780.92

8. [gi|24642691](#) Mass: 35887 Score: 38 Expect: 7.6 Queries matched: 7

CG13001-PA [Drosophila melanogaster]

| Observed | Mr(expt) | Mr(calc) | ppm  | Start | End   | Miss | Peptide              |
|----------|----------|----------|------|-------|-------|------|----------------------|
| 1235.74  | 1234.73  | 1234.67  | 50.5 | 13    | - 22  | 1    | R.HYYAKLEAIK.D       |
| 1532.86  | 1531.85  | 1531.74  | 69.2 | 254   | - 268 | 0    | K.GDFSAPPPPPPSNR.L   |
| 1611.83  | 1610.83  | 1610.75  | 45.6 | 130   | - 143 | 1    | R.DLHEEGSPISKDR.F    |
| 1770.90  | 1769.89  | 1769.89  | 1.83 | 285   | - 299 | 1    | R.SDFNVNLRQQPPPMK.S  |
| 1842.98  | 1841.98  | 1841.85  | 66.7 | 2     | - 17  | 1    | M.ATSEISSNERHYAK.L   |
| 1948.97  | 1947.96  | 1947.94  | 10.1 | 97    | - 112 | 1    | R.SFDMANRVYEEYLALK.Y |

2251.10 2250.09 2250.06 12.0 300 - 319 1 K.SCLSCHQQIHRNAPICPLCK.A  
**No match to:** 1038.69, 1062.66, 1090.65, 1163.69, 1191.69, 1196.65, 1202.66, 1273.73, 1292.79, 1302.72, 1306.80, 1309.74, 1363.71, 1370.77, 1372.80, 1392.82, 1416.78, 1422.79, 1424.74, 1434.80, 1436.75, 1439.78, 1466.82, 1482.82, 1493.79, 1520.84, 1530.85, 1532.86, 1552.85, 1564.83, 1572.97, 1577.85, 1579.81, 1590.85, 1600.90, 1631.83, 1635.87, 1649.85, 1655.89, 1658.86, 1687.91, 1706.83, 1739.89, 1750.91, 1775.89, 1782.90, 1814.00, 1878.94, 1978.97, 1988.05, 2070.01, 2075.06, 2084.09, 2086.05, 2090.04, 2101.09, 2298.15, 2351.11, 2724.38, 2780.43, 2780.92

9. [gi|28573188](#) Mass: 64835 Score: 37 Expect: 8.7 Queries matched: 9

alpha-Esterase-1 CG1031-PA [Drosophila melanogaster]

| Observed | Mr(expt) | Mr(calc) | ppm    | Start | End | Miss | Peptide                                                    |
|----------|----------|----------|--------|-------|-----|------|------------------------------------------------------------|
| 1302.72  | 1301.71  | 1301.72  | -10.05 | 540   | -   | 550  | 0 K.QLEFIVLPESK.Q                                          |
| 1649.85  | 1648.84  | 1648.80  | 28.8   | 408   | -   | 420  | 0 R.MEFNECLHILSVK.H + Oxidation (M); Propionamide (C)      |
| 1775.89  | 1774.89  | 1774.89  | 1.03   | 406   | -   | 420  | 1 R.GRMEFNECLHILSVK.H                                      |
| 1988.05  | 1987.04  | 1986.97  | 35.9   | 286   | -   | 304  | 0 K.APASEMAAQGITLVSQEER.R                                  |
| 2075.06  | 2074.05  | 2073.96  | 45.1   | 260   | -   | 277  | 1 R.WAYRLACQLGYSGSENEK.E                                   |
| 2090.04  | 2089.04  | 2089.03  | 2.92   | 76    | -   | 93   | 1 R.APQPPHPWLGVRDCTYPR.A                                   |
| 2101.09  | 2100.08  | 2099.99  | 40.0   | 264   | -   | 281  | 1 R.LACQLGYSGSENEKEVFR.Y + Propionamide (C)                |
| 2251.10  | 2250.09  | 2250.01  | 36.1   | 447   | -   | 464  | 1 R.FDVDSPHFNHFRQVMCGK.H + Oxidation (M); Propionamide (C) |
| 2298.15  | 2297.15  | 2297.24  | -39.81 | 168   | -   | 190  | 1 R.VGALGFLSLADRLDVPGNAGLK.D                               |

**No match to:** 1038.69, 1062.66, 1090.65, 1163.69, 1191.69, 1196.65, 1202.66, 1235.74, 1273.73, 1292.79, 1302.72, 1306.80, 1309.74, 1363.71, 1370.77, 1372.80, 1392.82, 1416.78, 1422.79, 1424.74, 1434.80, 1436.75, 1439.78, 1466.82, 1482.82, 1493.79, 1520.84, 1530.85, 1532.86, 1552.85, 1564.83, 1572.97, 1577.85, 1579.81, 1590.85, 1600.90, 1611.83, 1631.83, 1635.87, 1655.89, 1658.86, 1687.91, 1706.83, 1739.89, 1750.91, 1770.90, 1782.90, 1814.00, 1842.98, 1878.94, 1948.97, 1978.97, 1988.05, 2070.01, 2084.09, 2086.05, 2090.04, 2101.09, 2251.10, 2298.15, 2351.11, 2724.38, 2780.43, 2780.92

10. [gi|24644665](#) Mass: 19860 Score: 37 Expect: 11 Queries matched: 6

CG1307-PB [Drosophila melanogaster]

| Observed | Mr(expt) | Mr(calc) | ppm    | Start | End | Miss | Peptide                             |
|----------|----------|----------|--------|-------|-----|------|-------------------------------------|
| 1202.66  | 1201.66  | 1201.69  | -24.45 | 74    | -   | 83   | 1 K.MVLVVRNDLK.M + Oxidation (M)    |
| 1363.71  | 1362.70  | 1362.71  | -2.72  | 127   | -   | 138  | 1 R.VESEAEELMAIKK.E + Oxidation (M) |
| 1436.75  | 1435.75  | 1435.67  | 54.0   | 114   | -   | 126  | 1 R.SWENCGCAKIAVR.V                 |
| 1439.78  | 1438.77  | 1438.78  | -2.27  | 164   | -   | 178  | 0 K.TVLAVGPAAAADIDR.V               |
| 1658.86  | 1657.86  | 1657.91  | -30.91 | 123   | -   | 137  | 1 K.IAVRVESEAEELMAIK.K              |
| 2075.06  | 2074.05  | 2074.15  | -49.28 | 164   | -   | 184  | 1 K.TVLAVGPAAAADIDRVTGHLK.L         |

**No match to:** 1038.69, 1062.66, 1090.65, 1163.69, 1191.69, 1196.65, 1235.74, 1273.73, 1292.79, 1302.72, 1306.80, 1309.74, 1370.77, 1372.80, 1392.82, 1416.78, 1422.79, 1424.74, 1434.80, 1466.82, 1482.82, 1493.79, 1520.84, 1530.85, 1532.86, 1552.85, 1564.83, 1572.97, 1577.85, 1579.81, 1590.85, 1600.90, 1611.83, 1631.83, 1635.87, 1649.85, 1655.89, 1687.91, 1706.83, 1739.89, 1750.91, 1770.90, 1775.89, 1782.90, 1814.00, 1842.98, 1878.94, 1948.97, 1978.97, 1988.05, 2070.01, 2084.09, 2086.05, 2090.04, 2101.09, 2251.10, 2298.15, 2351.11, 2724.38, 2780.43, 2780.92

11. [gi|4389444](#) Mass: 18795 Score: 37 Expect: 11 Queries matched: 6

hypothetical 23.lkd-like protein [Drosophila melanogaster]

| Observed | Mr(expt) | Mr(calc) | ppm    | Start | End | Miss | Peptide                             |
|----------|----------|----------|--------|-------|-----|------|-------------------------------------|
| 1202.66  | 1201.66  | 1201.69  | -24.45 | 64    | -   | 73   | 1 K.MVLVVRNDLK.M + Oxidation (M)    |
| 1363.71  | 1362.70  | 1362.71  | -2.72  | 117   | -   | 128  | 1 R.VESEAEELMAIKK.E + Oxidation (M) |
| 1436.75  | 1435.75  | 1435.67  | 54.0   | 104   | -   | 116  | 1 R.SWENCGCAKIAVR.V                 |
| 1439.78  | 1438.77  | 1438.78  | -2.27  | 154   | -   | 168  | 0 K.TVLAVGPAAAADIDR.V               |
| 1658.86  | 1657.86  | 1657.91  | -30.91 | 113   | -   | 127  | 1 K.IAVRVESEAEELMAIK.K              |
| 2075.06  | 2074.05  | 2074.15  | -49.28 | 154   | -   | 174  | 1 K.TVLAVGPAAAADIDRVTGHLK.L         |

**No match to:** 1038.69, 1062.66, 1090.65, 1163.69, 1191.69, 1196.65, 1235.74, 1273.73, 1292.79, 1302.72, 1306.80, 1309.74, 1370.77, 1372.80, 1392.82, 1416.78, 1422.79, 1424.74, 1434.80, 1466.82, 1482.82, 1493.79, 1520.84, 1530.85, 1532.86, 1552.85, 1564.83, 1572.97, 1577.85, 1579.81, 1590.85, 1600.90, 1611.83, 1631.83, 1635.87, 1649.85, 1655.89, 1687.91, 1706.83, 1739.89, 1750.91, 1770.90, 1775.89, 1782.90, 1814.00, 1842.98, 1878.94, 1948.97, 1978.97, 1988.05, 2070.01, 2084.09, 2086.05, 2090.04, 2101.09, 2251.10, 2298.15, 2351.11, 2724.38, 2780.43, 2780.92

12. [gi|19528039](#) Mass: 62994 Score: 36 Expect: 11 Queries matched: 11

AT22192p [Drosophila melanogaster]

| Observed | Mr(expt) | Mr(calc) | ppm    | Start | End | Miss | Peptide                               |
|----------|----------|----------|--------|-------|-----|------|---------------------------------------|
| 1302.72  | 1301.71  | 1301.66  | 34.6   | 413   | -   | 423  | 0 R.CLIVADELAR.C + Propionamide (C)   |
| 1416.78  | 1415.77  | 1415.74  | 21.6   | 61    | -   | 72   | 1 K.YNHIPGSFRIGR.K                    |
| 1466.82  | 1465.81  | 1465.88  | -43.99 | 119   | -   | 131  | 1 K.LTKWIVKPPASAR.G                   |
| 1482.82  | 1481.81  | 1481.75  | 42.4   | 465   | -   | 476  | 1 R.EMGIALLSRYCR.D + Propionamide (C) |
| 1564.83  | 1563.82  | 1563.75  | 45.2   | 384   | -   | 395  | 1 K.HNQYTNRSIEFR.E                    |
| 1635.87  | 1634.86  | 1634.79  | 46.8   | 238   | -   | 250  | 0 K.WTLQSLWSCLNR.G                    |
| 1655.89  | 1654.89  | 1654.94  | -30.02 | 263   | -   | 278  | 1 R.NLVIKGIIVSGESGLNR.M               |
| 1706.83  | 1705.82  | 1705.82  | -3.34  | 238   | -   | 250  | 0 K.WTLQSLWSCLNR.G + Propionamide (C) |
| 1750.91  | 1749.90  | 1749.88  | 15.9   | 32    | -   | 45   | 1 R.IIKNTTDWMAVWEK.H + Oxidation (M)  |
| 2086.05  | 2085.04  | 2085.17  | -62.39 | 171   | -   | 187  | 1 R.LYVVLTSINPLRIYMYK.D               |
| 2101.09  | 2100.08  | 2100.09  | -7.33  | 424   | -   | 441  | 1 R.CQPLERIFPTAGTHVYLR.Y              |

**No match to:** 1038.69, 1062.66, 1090.65, 1163.69, 1191.69, 1196.65, 1202.66, 1235.74, 1273.73, 1292.79, 1306.80, 1309.74, 1363.71, 1370.77, 1372.80, 1392.82, 1422.79, 1424.74, 1434.80, 1436.75, 1439.78, 1493.79, 1520.84,



1530.85, 1532.86, 1552.85, 1572.97, 1577.85, 1579.81, 1590.85, 1600.90, 1611.83, 1631.83, 1649.85, 1658.86, 1687.91, 1739.89, 1770.90, 1775.89, 1782.90, 1814.00, 1842.98, 1878.94, 1948.97, 1978.97, 1988.05, 2070.01, 2075.06, 2084.09, 2090.04, 2251.10, 2298.15, 2351.11, 2724.38, 2780.43, 2780.92

13. [gi|24639878](#) Mass: 20523 Score: 36 Expect: 11 Queries matched: 8

CG4151-PA [Drosophila melanogaster]

| Observed                                                                                                                                                                                                                                                                                                                                                                                                                                                                                                                                                              | Mr(expt) | Mr(calc) | ppm   | Start | End | Miss | Peptide                                  |
|-----------------------------------------------------------------------------------------------------------------------------------------------------------------------------------------------------------------------------------------------------------------------------------------------------------------------------------------------------------------------------------------------------------------------------------------------------------------------------------------------------------------------------------------------------------------------|----------|----------|-------|-------|-----|------|------------------------------------------|
| 1309.74                                                                                                                                                                                                                                                                                                                                                                                                                                                                                                                                                               | 1308.73  | 1308.74  | -6.17 | 97    | -   | 107  | 1 R.LRPRPQSDGKR.I                        |
| 1493.79                                                                                                                                                                                                                                                                                                                                                                                                                                                                                                                                                               | 1492.78  | 1492.72  | 44.2  | 115   | -   | 126  | 1 R.ICLDDKCLASCWR.D + Propionamide (C)   |
| 1552.85                                                                                                                                                                                                                                                                                                                                                                                                                                                                                                                                                               | 1551.84  | 1551.75  | 60.9  | 31    | -   | 45   | 1 R.CTGLSSGQSVCIKRV.V                    |
| 1564.83                                                                                                                                                                                                                                                                                                                                                                                                                                                                                                                                                               | 1563.82  | 1563.75  | 45.5  | 115   | -   | 126  | 1 R.ICLDDKCLASCWR.D + 2 Propionamide (C) |
| 1631.83                                                                                                                                                                                                                                                                                                                                                                                                                                                                                                                                                               | 1630.82  | 1630.80  | 9.67  | 81    | -   | 96   | 1 R.CRNIPGTSGVGCQCAIR.L                  |
| 1687.91                                                                                                                                                                                                                                                                                                                                                                                                                                                                                                                                                               | 1686.90  | 1686.84  | 38.0  | 67    | -   | 80   | 1 R.DNGLEPIRETCITR.C + Propionamide (C)  |
| 1948.97                                                                                                                                                                                                                                                                                                                                                                                                                                                                                                                                                               | 1947.96  | 1947.94  | 9.73  | 121   | -   | 137  | 1 K.LASCWRDQGCACILQTR.C                  |
| 1978.97                                                                                                                                                                                                                                                                                                                                                                                                                                                                                                                                                               | 1977.96  | 1977.97  | -2.39 | 25    | -   | 43   | 1 R.RPCVGRCTGLSSGQSVCIKRV.N              |
| <b>No match to:</b> 1038.69, 1062.66, 1090.65, 1163.69, 1191.69, 1196.65, 1202.66, 1235.74, 1273.73, 1292.79, 1302.72, 1306.80, 1363.71, 1370.77, 1372.80, 1392.82, 1416.78, 1422.79, 1424.74, 1434.80, 1436.75, 1439.78, 1466.82, 1482.82, 1520.84, 1530.85, 1532.86, 1572.97, 1577.85, 1579.81, 1590.85, 1600.90, 1611.83, 1635.87, 1649.85, 1655.89, 1658.86, 1706.83, 1739.89, 1750.91, 1770.90, 1775.89, 1782.90, 1814.00, 1842.98, 1878.94, 1988.05, 2070.01, 2075.06, 2084.09, 2086.05, 2090.04, 2101.09, 2251.10, 2298.15, 2351.11, 2724.38, 2780.43, 2780.92 |          |          |       |       |     |      |                                          |

14. [gi|7572](#) Mass: 42939 Score: 36 Expect: 12 Queries matched: 7

aldolase-related protein [Drosophila melanogaster]

| Observed                                                                                                                                                                                                                                                                                                                                                                                                                                                                                                                                                                       | Mr(expt) | Mr(calc) | ppm    | Start | End | Miss | Peptide                                     |
|--------------------------------------------------------------------------------------------------------------------------------------------------------------------------------------------------------------------------------------------------------------------------------------------------------------------------------------------------------------------------------------------------------------------------------------------------------------------------------------------------------------------------------------------------------------------------------|----------|----------|--------|-------|-----|------|---------------------------------------------|
| 1370.77                                                                                                                                                                                                                                                                                                                                                                                                                                                                                                                                                                        | 1369.77  | 1369.78  | -12.65 | 304   | -   | 316  | 1 R.ALQASVLRWAGK.K                          |
| 1631.83                                                                                                                                                                                                                                                                                                                                                                                                                                                                                                                                                                        | 1630.82  | 1630.82  | -2.85  | 380   | -   | 395  | 1 R.LPAMPTSLSPSTNTKS.-                      |
| 1655.89                                                                                                                                                                                                                                                                                                                                                                                                                                                                                                                                                                        | 1654.89  | 1654.89  | -1.25  | 243   | -   | 257  | 0 K.NTPEEIALTTVQALR.R                       |
| 1658.86                                                                                                                                                                                                                                                                                                                                                                                                                                                                                                                                                                        | 1657.86  | 1657.80  | 32.6   | 44    | -   | 57   | 1 R.LQDIGVENTEDNRR.A                        |
| 1782.90                                                                                                                                                                                                                                                                                                                                                                                                                                                                                                                                                                        | 1781.89  | 1781.84  | 28.9   | 331   | -   | 348  | 1 R.AKANGEAACGNYTAGSVK.G + Propionamide (C) |
| 2075.06                                                                                                                                                                                                                                                                                                                                                                                                                                                                                                                                                                        | 2074.05  | 2074.11  | -28.25 | 70    | -   | 87   | 0 K.LAENISGVILFHETLYQK.A                    |
| 2780.43                                                                                                                                                                                                                                                                                                                                                                                                                                                                                                                                                                        | 2779.43  | 2779.43  | -2.35  | 216   | -   | 241  | 0 K.ALSDDHHVYLEGTLKPNMVTAGQSAK.K            |
| <b>No match to:</b> 1038.69, 1062.66, 1090.65, 1163.69, 1191.69, 1196.65, 1202.66, 1235.74, 1273.73, 1292.79, 1302.72, 1306.80, 1309.74, 1363.71, 1372.80, 1392.82, 1416.78, 1422.79, 1424.74, 1434.80, 1436.75, 1439.78, 1466.82, 1482.82, 1493.79, 1520.84, 1530.85, 1532.86, 1552.85, 1564.83, 1572.97, 1577.85, 1579.81, 1590.85, 1600.90, 1611.83, 1635.87, 1649.85, 1687.91, 1706.83, 1739.89, 1750.91, 1770.90, 1775.89, 1814.00, 1842.98, 1878.94, 1948.97, 1978.97, 1988.05, 2070.01, 2084.09, 2086.05, 2090.04, 2101.09, 2251.10, 2298.15, 2351.11, 2724.38, 2780.92 |          |          |        |       |     |      |                                             |

15. [gi|6685149](#) Mass: 137181 Score: 35 Expect: 14 Queries matched: 13

xmas-2 [Drosophila melanogaster]

| Observed                                                                                                                                                                                                                                                                                                                                                                                                                                                                                                                 | Mr(expt) | Mr(calc) | ppm    | Start | End | Miss | Peptide                                              |
|--------------------------------------------------------------------------------------------------------------------------------------------------------------------------------------------------------------------------------------------------------------------------------------------------------------------------------------------------------------------------------------------------------------------------------------------------------------------------------------------------------------------------|----------|----------|--------|-------|-----|------|------------------------------------------------------|
| 1090.65                                                                                                                                                                                                                                                                                                                                                                                                                                                                                                                  | 1089.64  | 1089.61  | 30.3   | 862   | -   | 871  | 0 R.LMIALESAVK.F + Oxidation (M)                     |
| 1163.69                                                                                                                                                                                                                                                                                                                                                                                                                                                                                                                  | 1162.68  | 1162.63  | 37.4   | 338   | -   | 346  | 1 R.QYELVEVKR.V                                      |
| 1309.74                                                                                                                                                                                                                                                                                                                                                                                                                                                                                                                  | 1308.73  | 1308.68  | 38.8   | 742   | -   | 753  | 0 R.GLLQPPQSPDAR.F                                   |
| 1422.79                                                                                                                                                                                                                                                                                                                                                                                                                                                                                                                  | 1421.78  | 1421.75  | 20.4   | 349   | -   | 362  | 0 K.SVGEVVSGEPLPPR.D                                 |
| 1552.85                                                                                                                                                                                                                                                                                                                                                                                                                                                                                                                  | 1551.84  | 1551.83  | 9.44   | 892   | -   | 904  | 0 R.EYLLVNLGSELFR.R                                  |
| 1564.83                                                                                                                                                                                                                                                                                                                                                                                                                                                                                                                  | 1563.82  | 1563.80  | 13.1   | 549   | -   | 560  | 0 K.LEQLFFVQQQER.E                                   |
| 1577.85                                                                                                                                                                                                                                                                                                                                                                                                                                                                                                                  | 1576.85  | 1576.86  | -9.99  | 18    | -   | 30   | 1 R.NIPELFLDKYVAR.S                                  |
| 1631.83                                                                                                                                                                                                                                                                                                                                                                                                                                                                                                                  | 1630.82  | 1630.77  | 30.1   | 457   | -   | 470  | 0 R.AQEFQEQAPATQQR.R                                 |
| 1649.85                                                                                                                                                                                                                                                                                                                                                                                                                                                                                                                  | 1648.84  | 1648.91  | -43.69 | 347   | -   | 362  | 1 R.VKSVGEVVSGEPLPPR.D                               |
| 1770.90                                                                                                                                                                                                                                                                                                                                                                                                                                                                                                                  | 1769.89  | 1769.86  | 18.2   | 167   | -   | 179  | 1 K.CLQTLKMYHDLR.I + Oxidation (M); Propionamide (C) |
| 1814.00                                                                                                                                                                                                                                                                                                                                                                                                                                                                                                                  | 1813.00  | 1812.97  | 12.0   | 958   | -   | 973  | 0 R.VFVQPLPIESSLNTNR.L                               |
| 2086.05                                                                                                                                                                                                                                                                                                                                                                                                                                                                                                                  | 2085.04  | 2085.08  | -18.25 | 783   | -   | 802  | 0 K.ATDLAEANGIICLIGLDDIR.L                           |
| 2351.11                                                                                                                                                                                                                                                                                                                                                                                                                                                                                                                  | 2350.10  | 2350.08  | 9.47   | 363   | -   | 381  | 0 R.DLYLNHRPHNSFDDYGLK.S + Oxidation (M)             |
| <b>No match to:</b> 1038.69, 1062.66, 1191.69, 1196.65, 1202.66, 1235.74, 1273.73, 1292.79, 1302.72, 1306.80, 1363.71, 1370.77, 1372.80, 1392.82, 1416.78, 1424.74, 1434.80, 1436.75, 1439.78, 1466.82, 1482.82, 1493.79, 1520.84, 1530.85, 1532.86, 1572.97, 1579.81, 1590.85, 1600.90, 1611.83, 1635.87, 1655.89, 1658.86, 1687.91, 1706.83, 1739.89, 1750.91, 1775.89, 1782.90, 1842.98, 1878.94, 1948.97, 1978.97, 1988.05, 2070.01, 2075.06, 2084.09, 2090.04, 2101.09, 2251.10, 2298.15, 2724.38, 2780.43, 2780.92 |          |          |        |       |     |      |                                                      |

16. [gi|45551983](#) Mass: 43217 Score: 35 Expect: 14 Queries matched: 7

Aldolase CG6058-PA, isoform A [Drosophila melanogaster]

| Observed                                                                                                                                                                                                                                                                                                                                       | Mr(expt) | Mr(calc) | ppm    | Start | End | Miss | Peptide                                     |
|------------------------------------------------------------------------------------------------------------------------------------------------------------------------------------------------------------------------------------------------------------------------------------------------------------------------------------------------|----------|----------|--------|-------|-----|------|---------------------------------------------|
| 1370.77                                                                                                                                                                                                                                                                                                                                        | 1369.77  | 1369.78  | -12.65 | 337   | -   | 349  | 1 R.ALQASVLRWAGK.K                          |
| 1520.84                                                                                                                                                                                                                                                                                                                                        | 1519.83  | 1519.86  | -21.15 | 235   | -   | 248  | 1 R.AQKVTETVLAAYK.A                         |
| 1579.81                                                                                                                                                                                                                                                                                                                                        | 1578.81  | 1578.78  | 20.3   | 31    | -   | 43   | 1 R.ISKMTTYFNYPK.E                          |
| 1658.86                                                                                                                                                                                                                                                                                                                                        | 1657.86  | 1657.80  | 32.6   | 77    | -   | 90   | 1 R.LQDIGVENTEDNRR.A                        |
| 1782.90                                                                                                                                                                                                                                                                                                                                        | 1781.89  | 1781.84  | 28.9   | 364   | -   | 381  | 1 R.AKANGEAACGNYTAGSVK.G + Propionamide (C) |
| 2075.06                                                                                                                                                                                                                                                                                                                                        | 2074.05  | 2074.11  | -28.25 | 103   | -   | 120  | 0 K.LAENISGVILFHETLYQK.A                    |
| 2780.43                                                                                                                                                                                                                                                                                                                                        | 2779.43  | 2779.43  | -2.35  | 249   | -   | 274  | 0 K.ALSDDHHVYLEGTLKPNMVTAGQSAK.K            |
| <b>No match to:</b> 1038.69, 1062.66, 1090.65, 1163.69, 1191.69, 1196.65, 1202.66, 1235.74, 1273.73, 1292.79, 1302.72, 1306.80, 1309.74, 1363.71, 1372.80, 1392.82, 1416.78, 1422.79, 1424.74, 1434.80, 1436.75, 1439.78, 1466.82, 1482.82, 1493.79, 1530.85, 1532.86, 1552.85, 1564.83, 1572.97, 1577.85, 1590.85, 1600.90, 1611.83, 1631.83, |          |          |        |       |     |      |                                             |

1635.87, 1649.85, 1655.89, 1687.91, 1706.83, 1739.89, 1750.91, 1770.90, 1775.89, 1814.00, 1842.98, 1878.94, 1948.97, 1978.97, 1988.05, 2070.01, 2084.09, 2086.05, 2090.04, 2101.09, 2251.10, 2298.15, 2351.11, 2724.38, 2780.92

17. [gi|21430850](#) Mass: 43587 Score: 35 Expect: 15 Queries matched: 8

SD20045p [Drosophila melanogaster]

| Observed                                                                                                                                                                                                                                                                                                                                                                                                                                                                                                                                                                                         | Mr(expt) | Mr(calc) | ppm    | Start | End   | Miss | Peptide                                                |
|--------------------------------------------------------------------------------------------------------------------------------------------------------------------------------------------------------------------------------------------------------------------------------------------------------------------------------------------------------------------------------------------------------------------------------------------------------------------------------------------------------------------------------------------------------------------------------------------------|----------|----------|--------|-------|-------|------|--------------------------------------------------------|
| 1372.80                                                                                                                                                                                                                                                                                                                                                                                                                                                                                                                                                                                          | 1371.79  | 1371.75  | 29.3   | 331   | - 342 | 1    | K.LGKIQLYEGHSEK.E                                      |
| 1434.80                                                                                                                                                                                                                                                                                                                                                                                                                                                                                                                                                                                          | 1433.79  | 1433.74  | 37.3   | 285   | - 298 | 0    | K.TLDAAFEEAAIEVSK.W                                    |
| 1532.86                                                                                                                                                                                                                                                                                                                                                                                                                                                                                                                                                                                          | 1531.85  | 1531.75  | 64.8   | 201   | - 213 | 1    | K.ESKEMLAALCPNR.N + Propionamide (C)                   |
| 1552.85                                                                                                                                                                                                                                                                                                                                                                                                                                                                                                                                                                                          | 1551.84  | 1551.78  | 39.7   | 237   | - 249 | 1    | K.LRNFAFNEAMTLTR.H + Oxidation (M)                     |
| 1687.91                                                                                                                                                                                                                                                                                                                                                                                                                                                                                                                                                                                          | 1686.90  | 1686.89  | 6.99   | 271   | - 284 | 0    | K.QTGVFHPNPLNVVYK.T                                    |
| 1775.89                                                                                                                                                                                                                                                                                                                                                                                                                                                                                                                                                                                          | 1774.89  | 1774.93  | -26.17 | 316   | - 330 | 0    | K.YHGPWNPLLLGLLHMK.L                                   |
| 1978.97                                                                                                                                                                                                                                                                                                                                                                                                                                                                                                                                                                                          | 1977.96  | 1977.93  | 16.4   | 250   | - 265 | 1    | R.HNLENMKDVAYLDVCK.V + Oxidation (M); Propionamide (C) |
| 2090.04                                                                                                                                                                                                                                                                                                                                                                                                                                                                                                                                                                                          | 2089.04  | 2088.99  | 24.4   | 204   | - 223 | 1    | K.EMLAALCPNRNCGAGISVDR.N                               |
| <b>No match to:</b> 1038.69, 1062.66, 1090.65, 1163.69, 1191.69, 1196.65, 1202.66, 1235.74, 1273.73, 1292.79, 1302.72, 1306.80, 1309.74, 1363.71, 1370.77, 1392.82, 1416.78, 1422.79, 1424.74, 1436.75, 1439.78, 1466.82, 1482.82, 1493.79, 1520.84, 1530.85, 1532.86, 1564.83, 1572.97, 1577.85, 1579.81, 1590.85, 1600.90, 1611.83, 1631.83, 1635.87, 1649.85, 1655.89, 1658.86, 1706.83, 1739.89, 1750.91, 1770.90, 1775.89, 1782.90, 1814.00, 1842.98, 1878.94, 1948.97, 1978.97, 1988.05, 2070.01, 2075.06, 2084.09, 2086.05, 2101.09, 2251.10, 2298.15, 2351.11, 2724.38, 2780.43, 2780.92 |          |          |        |       |       |      |                                                        |

18. [gi|125978701](#) Mass: 30284 Score: 35 Expect: 15 Queries matched: 8

GA16922-PA [Drosophila pseudoobscura]

| Observed                                                                                                                                                                                                                                                                                                                                                                                                                                                                                                                                                                                | Mr(expt) | Mr(calc) | ppm    | Start | End   | Miss | Peptide                                                      |
|-----------------------------------------------------------------------------------------------------------------------------------------------------------------------------------------------------------------------------------------------------------------------------------------------------------------------------------------------------------------------------------------------------------------------------------------------------------------------------------------------------------------------------------------------------------------------------------------|----------|----------|--------|-------|-------|------|--------------------------------------------------------------|
| 1202.66                                                                                                                                                                                                                                                                                                                                                                                                                                                                                                                                                                                 | 1201.66  | 1201.60  | 45.5   | 1     | - 12  | 0    | -.SEDPAAIAGLMK.L                                             |
| 1273.73                                                                                                                                                                                                                                                                                                                                                                                                                                                                                                                                                                                 | 1272.72  | 1272.71  | 13.8   | 43    | - 52  | 1    | R.LRYNLEGRPR.H                                               |
| 1493.79                                                                                                                                                                                                                                                                                                                                                                                                                                                                                                                                                                                 | 1492.78  | 1492.69  | 58.9   | 59    | - 69  | 1    | R.WREFDVEIEDR.L                                              |
| 1564.83                                                                                                                                                                                                                                                                                                                                                                                                                                                                                                                                                                                 | 1563.82  | 1563.76  | 40.5   | 179   | - 190 | 1    | R.FQWGILECQERR.L                                             |
| 1572.97                                                                                                                                                                                                                                                                                                                                                                                                                                                                                                                                                                                 | 1571.96  | 1571.86  | 63.5   | 1     | - 15  | 1    | -.SEDPAAIAGLMKLLK.Q + Oxidation (M)                          |
| 1635.87                                                                                                                                                                                                                                                                                                                                                                                                                                                                                                                                                                                 | 1634.86  | 1634.80  | 40.0   | 179   | - 190 | 1    | R.FQWGILECQERR.L + Propionamide (C)                          |
| 2075.06                                                                                                                                                                                                                                                                                                                                                                                                                                                                                                                                                                                 | 2074.05  | 2073.99  | 29.0   | 90    | - 108 | 1    | R.GRQSLGCYVVACCAASIFR.R + Propionamide (C)                   |
| 2298.15                                                                                                                                                                                                                                                                                                                                                                                                                                                                                                                                                                                 | 2297.15  | 2297.21  | -29.02 | 230   | - 247 | 1    | R.QLMVLVLLYCMVVTNLNRCK.K + Oxidation (M); 2 Propionamide (C) |
| <b>No match to:</b> 1038.69, 1062.66, 1090.65, 1163.69, 1191.69, 1196.65, 1235.74, 1292.79, 1302.72, 1306.80, 1309.74, 1363.71, 1370.77, 1372.80, 1392.82, 1416.78, 1422.79, 1424.74, 1434.80, 1436.75, 1439.78, 1466.82, 1482.82, 1520.84, 1530.85, 1532.86, 1552.85, 1572.97, 1577.85, 1579.81, 1590.85, 1600.90, 1611.83, 1631.83, 1635.87, 1649.85, 1655.89, 1658.86, 1687.91, 1706.83, 1739.89, 1750.91, 1770.90, 1775.89, 1782.90, 1814.00, 1842.98, 1878.94, 1948.97, 1978.97, 1988.05, 2070.01, 2084.09, 2086.05, 2090.04, 2101.09, 2251.10, 2351.11, 2724.38, 2780.43, 2780.92 |          |          |        |       |       |      |                                                              |

19. [gi|27544248](#) Mass: 118888 Score: 35 Expect: 17 Queries matched: 12

supressor of Ty element 16 [Drosophila melanogaster]

| Observed                                                                                                                                                                                                                                                                                                                                                                                                                                                                                                                          | Mr(expt) | Mr(calc) | ppm   | Start | End   | Miss | Peptide                          |
|-----------------------------------------------------------------------------------------------------------------------------------------------------------------------------------------------------------------------------------------------------------------------------------------------------------------------------------------------------------------------------------------------------------------------------------------------------------------------------------------------------------------------------------|----------|----------|-------|-------|-------|------|----------------------------------|
| 1191.69                                                                                                                                                                                                                                                                                                                                                                                                                                                                                                                           | 1190.68  | 1190.63  | 46.2  | 76    | - 85  | 1    | K.DQGNFEKLIK.A                   |
| 1196.65                                                                                                                                                                                                                                                                                                                                                                                                                                                                                                                           | 1195.64  | 1195.59  | 46.1  | 760   | - 769 | 0    | K.SVVEFDTPFR.E                   |
| 1273.73                                                                                                                                                                                                                                                                                                                                                                                                                                                                                                                           | 1272.72  | 1272.64  | 66.2  | 298   | - 308 | 0    | K.EKPSMVDNLPK.S + Oxidation (M)  |
| 1363.71                                                                                                                                                                                                                                                                                                                                                                                                                                                                                                                           | 1362.70  | 1362.65  | 38.5  | 537   | - 548 | 0    | R.INFFHPGATMGR.N + Oxidation (M) |
| 1416.78                                                                                                                                                                                                                                                                                                                                                                                                                                                                                                                           | 1415.77  | 1415.71  | 45.9  | 481   | - 492 | 1    | K.SISQMPREPEVK.E + Oxidation (M) |
| 1572.97                                                                                                                                                                                                                                                                                                                                                                                                                                                                                                                           | 1571.96  | 1571.94  | 12.2  | 629   | - 641 | 1    | K.LKDLYIRPNIVTK.R                |
| 1577.85                                                                                                                                                                                                                                                                                                                                                                                                                                                                                                                           | 1576.85  | 1576.85  | -5.02 | 277   | - 290 | 1    | K.LLVPGTKLCDVYK.T                |
| 1649.85                                                                                                                                                                                                                                                                                                                                                                                                                                                                                                                           | 1648.84  | 1648.81  | 20.1  | 549   | - 563 | 0    | R.NEGGLYPQPEATFVK.E              |
| 1658.86                                                                                                                                                                                                                                                                                                                                                                                                                                                                                                                           | 1657.86  | 1657.79  | 37.0  | 523   | - 536 | 0    | K.NISQSVEGEYTYLR.I               |
| 1782.90                                                                                                                                                                                                                                                                                                                                                                                                                                                                                                                           | 1781.89  | 1781.90  | -6.11 | 835   | - 850 | 0    | K.VAMVNAIPNMMLDHVK.E             |
| 2101.09                                                                                                                                                                                                                                                                                                                                                                                                                                                                                                                           | 2100.08  | 2100.09  | -3.16 | 53    | - 70  | 0    | K.QTQNTITEGFPPEINLLVR.D          |
| 2298.15                                                                                                                                                                                                                                                                                                                                                                                                                                                                                                                           | 2297.15  | 2297.13  | 5.96  | 549   | - 568 | 1    | R.NEGGLYPQPEATFVKEVYR.S          |
| <b>No match to:</b> 1038.69, 1062.66, 1090.65, 1163.69, 1202.66, 1235.74, 1292.79, 1302.72, 1306.80, 1309.74, 1370.77, 1372.80, 1392.82, 1422.79, 1424.74, 1434.80, 1436.75, 1439.78, 1466.82, 1482.82, 1493.79, 1520.84, 1530.85, 1532.86, 1552.85, 1564.83, 1579.81, 1590.85, 1600.90, 1611.83, 1631.83, 1635.87, 1655.89, 1687.91, 1706.83, 1739.89, 1750.91, 1770.90, 1775.89, 1814.00, 1842.98, 1878.94, 1948.97, 1978.97, 1988.05, 2070.01, 2075.06, 2084.09, 2086.05, 2090.04, 2251.10, 2351.11, 2724.38, 2780.43, 2780.92 |          |          |       |       |       |      |                                  |

20. [gi|21356157](#) Mass: 27835 Score: 35 Expect: 17 Queries matched: 6

Aly CG1101-PA [Drosophila melanogaster]

| Observed                                                                                                                                                                                                                                                                                                                                                                                                                                                                                                                                                                                                  | Mr(expt) | Mr(calc) | ppm    | Start | End   | Miss | Peptide                                   |
|-----------------------------------------------------------------------------------------------------------------------------------------------------------------------------------------------------------------------------------------------------------------------------------------------------------------------------------------------------------------------------------------------------------------------------------------------------------------------------------------------------------------------------------------------------------------------------------------------------------|----------|----------|--------|-------|-------|------|-------------------------------------------|
| 1038.69                                                                                                                                                                                                                                                                                                                                                                                                                                                                                                                                                                                                   | 1037.68  | 1037.63  | 47.8   | 58    | - 67  | 1    | R.KPGSVLKGPR.G                            |
| 1363.71                                                                                                                                                                                                                                                                                                                                                                                                                                                                                                                                                                                                   | 1362.70  | 1362.73  | -16.76 | 148   | - 159 | 1    | R.SLGTADVIFERR.A                          |
| 1520.84                                                                                                                                                                                                                                                                                                                                                                                                                                                                                                                                                                                                   | 1519.83  | 1519.79  | 24.5   | 5     | - 17  | 1    | K.IEMSLDDIIKSTR.S                         |
| 1552.85                                                                                                                                                                                                                                                                                                                                                                                                                                                                                                                                                                                                   | 1551.84  | 1551.85  | -2.46  | 48    | - 64  | 1    | R.GGANAGGSPRKPQSVLK.G                     |
| 1649.85                                                                                                                                                                                                                                                                                                                                                                                                                                                                                                                                                                                                   | 1648.84  | 1648.84  | 0.74   | 1     | - 14  | 1    | -.MVDKIEMSLDDIIK.S                        |
| 2351.11                                                                                                                                                                                                                                                                                                                                                                                                                                                                                                                                                                                                   | 2350.10  | 2350.09  | 5.84   | 246   | - 266 | 1    | K.APPTAEELDAELDSYINDMKI.- + Oxidation (M) |
| <b>No match to:</b> 1062.66, 1090.65, 1163.69, 1191.69, 1196.65, 1202.66, 1235.74, 1273.73, 1292.79, 1302.72, 1306.80, 1309.74, 1370.77, 1372.80, 1392.82, 1416.78, 1422.79, 1424.74, 1434.80, 1436.75, 1439.78, 1466.82, 1482.82, 1493.79, 1520.84, 1530.85, 1532.86, 1552.85, 1564.83, 1572.97, 1577.85, 1579.81, 1590.85, 1600.90, 1611.83, 1631.83, 1635.87, 1655.89, 1658.86, 1687.91, 1706.83, 1739.89, 1750.91, 1770.90, 1775.89, 1782.90, 1814.00, 1842.98, 1878.94, 1948.97, 1978.97, 1988.05, 2070.01, 2075.06, 2084.09, 2086.05, 2090.04, 2101.09, 2251.10, 2298.15, 2724.38, 2780.43, 2780.92 |          |          |        |       |       |      |                                           |

## Search Parameters

Type of search : Peptide Mass Fingerprint  
Enzyme : Trypsin  
Variable modifications : Oxidation (M),Propionamide (C)  
Mass values : Monoisotopic  
Protein Mass : Unrestricted  
Peptide Mass Tolerance :  $\pm$  70 ppm  
Peptide Charge State : 1+  
Max Missed Cleavages : 1  
Number of queries : 67

Mascot: <http://www.matrixscience.com/>

# Mascot Search Results

**User** : Ilya  
**Email** : toropygin@rambler.ru  
**Search title** : Submitted from Shidlovsky 080328 II by Mascot Daemon on P4P800SE  
**MS data file** : \\192.168.0.18\data on ultraflex-2\DATA\2008\_Ilya\Shidlovsky\080328\016\0\_K22\1\016\_0\_K22\_1.dar  
**Database** : NCBI nr 20070307 (4984280 sequences; 1723577896 residues)  
**Taxonomy** : Drosophila (fruit flies) (47828 sequences)  
**Timestamp** : 2 Apr 2008 at 20:07:31 GMT  
**Top score** : 147 for [gi|24642732](#), xmas-2 CG32562-PA [Drosophila melanogaster]

## Probability Based Mowse Score

Protein score is  $-10 \cdot \log(P)$ , where P is the probability that the observed match is a random event. Protein scores greater than 59 are significant ( $p < 0.05$ ).

Score Distribution

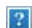

## Protein Summary Report

|                           |                      |
|---------------------------|----------------------|
| Protein Summary           | <a href="#">Help</a> |
| Significance threshold p< | Max. number of hits  |

## Overview Table

Click on column header to jump to entry in results list.  
 Move mouse over any indicator to highlight identical peptides.  
 Click on an indicator to see details of individual match.  
 Use check boxes to select sub-set of queries for new search.

Mouse over:

| Hit:                         | 1 | 2 | 3 | 4 | 5 | 6 | 7 | 8 | 9 | 10 | 11 | 12 | 13 | 14 | 15 | 16 | 17 | 18 | 19 | 20 |
|------------------------------|---|---|---|---|---|---|---|---|---|----|----|----|----|----|----|----|----|----|----|----|
| <a href="#">865.45</a> (1+)  |   |   |   |   |   |   |   |   |   |    |    |    |    |    |    |    |    |    |    |    |
| <a href="#">947.51</a> (1+)  |   |   |   |   |   |   |   |   |   |    |    |    |    |    |    |    |    |    |    |    |
| <a href="#">1034.56</a> (1+) |   |   |   |   |   |   |   |   |   |    |    |    |    |    |    |    |    |    |    |    |
| <a href="#">1079.53</a> (1+) |   |   |   |   |   |   |   |   |   |    |    |    |    |    |    |    |    |    |    |    |
| <a href="#">1163.59</a> (1+) |   |   |   |   |   |   |   |   |   |    |    |    |    |    |    |    |    |    |    |    |
| <a href="#">1228.65</a> (1+) |   |   |   |   |   |   |   |   |   |    |    |    |    |    |    |    |    |    |    |    |
| <a href="#">1293.60</a> (1+) |   |   |   |   |   |   |   |   |   |    |    |    |    |    |    |    |    |    |    |    |
| <a href="#">1309.64</a> (1+) |   |   |   |   |   |   |   |   |   |    |    |    |    |    |    |    |    |    |    |    |
| <a href="#">1341.67</a> (1+) |   |   |   |   |   |   |   |   |   |    |    |    |    |    |    |    |    |    |    |    |
| <a href="#">1418.78</a> (1+) |   |   |   |   |   |   |   |   |   |    |    |    |    |    |    |    |    |    |    |    |
| <a href="#">1422.71</a> (1+) |   |   |   |   |   |   |   |   |   |    |    |    |    |    |    |    |    |    |    |    |
| <a href="#">1503.73</a> (1+) |   |   |   |   |   |   |   |   |   |    |    |    |    |    |    |    |    |    |    |    |
| <a href="#">1519.75</a> (1+) |   |   |   |   |   |   |   |   |   |    |    |    |    |    |    |    |    |    |    |    |
| <a href="#">1530.77</a> (1+) |   |   |   |   |   |   |   |   |   |    |    |    |    |    |    |    |    |    |    |    |
| <a href="#">1577.84</a> (1+) |   |   |   |   |   |   |   |   |   |    |    |    |    |    |    |    |    |    |    |    |
| <a href="#">1631.77</a> (1+) |   |   |   |   |   |   |   |   |   |    |    |    |    |    |    |    |    |    |    |    |
| <a href="#">1649.88</a> (1+) |   |   |   |   |   |   |   |   |   |    |    |    |    |    |    |    |    |    |    |    |



|         |         |         |        |      |   |      |   |                                            |
|---------|---------|---------|--------|------|---|------|---|--------------------------------------------|
| 1649.88 | 1648.87 | 1648.91 | -28.01 | 533  | - | 548  | 1 | R.VKSVGEVVSGEPLPPR.D                       |
| 1745.91 | 1744.90 | 1744.95 | -31.97 | 13   | - | 26   | 1 | K.TLLCRNIPELFLDK.Y + Propionamide (C)      |
| 1753.87 | 1752.87 | 1752.87 | -0.01  | 318  | - | 332  | 1 | K.LVEQCARFHIHCAAR.L                        |
| 1787.89 | 1786.88 | 1786.87 | 5.71   | 643  | - | 657  | 1 | R.AQEFQEQAPATQQR.A                         |
| 1842.94 | 1841.93 | 1841.94 | -5.22  | 166  | - | 181  | 1 | R.RPAHTSEEKFSVLDAR.D                       |
| 1874.91 | 1873.91 | 1873.90 | 2.25   | 641  | - | 656  | 1 | K.SRAQEFQEQAPATQQR.R                       |
| 1934.02 | 1933.02 | 1933.04 | -13.66 | 732  | - | 746  | 1 | R.QLKLEQLFFVQQQR.E                         |
| 2086.04 | 2085.03 | 2085.08 | -23.66 | 969  | - | 988  | 0 | K.ATDLAEANGIICLIGLDDIR.L                   |
| 2321.11 | 2320.11 | 2320.08 | 11.5   | 219  | - | 237  | 0 | R.QVAYYELQPGSDELICHER.A + Propionamide (C) |
| 2342.18 | 2341.18 | 2341.16 | 7.03   | 1124 | - | 1143 | 0 | R.LQLVAGEDLSDWPQFPPEELR.V                  |
| 2351.11 | 2350.11 | 2350.08 | 10.7   | 549  | - | 567  | 0 | R.DLYLNHRPHNSFDDYGMLK.S + Oxidation (M)    |
| 2430.17 | 2429.16 | 2429.15 | 3.46   | 91   | - | 111  | 0 | K.TEEWVDPDIQAELSALQSGWR.N                  |
| 2437.17 | 2436.16 | 2436.15 | 6.59   | 1228 | - | 1247 | 0 | K.ILOYDTDDYLNLFVEYLGER.M                   |

**No match to:** 1034.56, 1079.53, 1228.65, 1293.60, 1341.67, 1530.77, 1686.85, 1706.82, 1877.95, 1925.00, 2031.01, 2033.10, 2468.35, 2617.36, 2724.38, 2865.52, 2918.50, 3159.59, 3338.75

2. [gi|6685149](#) Mass: 137181 Score: 102 Expect: 3e-006 Queries matched: 18

xmas-2 [Drosophila melanogaster]

| Observed | Mr(expt) | Mr(calc) | ppm    | Start | End | Miss | Peptide |                                         |
|----------|----------|----------|--------|-------|-----|------|---------|-----------------------------------------|
| 1163.59  | 1162.58  | 1162.63  | -44.41 | 338   | -   | 346  | 1       | R.QYELVEVKR.V                           |
| 1309.64  | 1308.63  | 1308.68  | -35.04 | 742   | -   | 753  | 0       | R.GLLQQPQSPDAR.F                        |
| 1418.78  | 1417.77  | 1417.82  | -35.67 | 36    | -   | 47   | 0       | R.FGTLVNFVLRPR.R                        |
| 1422.71  | 1421.70  | 1421.75  | -35.46 | 349   | -   | 362  | 0       | K.SVGEVVSGEPLPPR.D                      |
| 1503.73  | 1502.73  | 1502.76  | -20.04 | 326   | -   | 337  | 1       | R.MHTVETEKLR.Q                          |
| 1519.75  | 1518.74  | 1518.75  | -7.45  | 326   | -   | 337  | 1       | R.MHTVETEKLR.Q + Oxidation (M)          |
| 1577.84  | 1576.83  | 1576.86  | -21.13 | 18    | -   | 30   | 1       | R.NIPELFLDKYVAR.S                       |
| 1631.77  | 1630.76  | 1630.77  | -7.02  | 457   | -   | 470  | 0       | R.AQEFQEQAPATQQR.R                      |
| 1649.88  | 1648.87  | 1648.91  | -28.01 | 347   | -   | 362  | 1       | R.VKSVGEVVSGEPLPPR.D                    |
| 1745.91  | 1744.90  | 1744.95  | -31.97 | 13    | -   | 26   | 1       | K.TLLCRNIPELFLDK.Y + Propionamide (C)   |
| 1753.87  | 1752.87  | 1752.87  | -0.01  | 132   | -   | 146  | 1       | K.LVEQCARFHIHCAAR.L                     |
| 1787.89  | 1786.88  | 1786.87  | 5.71   | 457   | -   | 471  | 1       | R.AQEFQEQAPATQQR.A                      |
| 1874.91  | 1873.91  | 1873.90  | 2.25   | 455   | -   | 470  | 1       | K.SRAQEFQEQAPATQQR.R                    |
| 1934.02  | 1933.02  | 1933.04  | -13.66 | 546   | -   | 560  | 1       | R.QLKLEQLFFVQQQR.E                      |
| 2086.04  | 2085.03  | 2085.08  | -23.66 | 783   | -   | 802  | 0       | K.ATDLAEANGIICLIGLDDIR.L                |
| 2342.18  | 2341.18  | 2341.16  | 7.03   | 938   | -   | 957  | 0       | R.LQLVAGEDLSDWPQFPPEELR.V               |
| 2351.11  | 2350.11  | 2350.08  | 10.7   | 363   | -   | 381  | 0       | R.DLYLNHRPHNSFDDYGMLK.S + Oxidation (M) |
| 2437.17  | 2436.16  | 2436.15  | 6.59   | 1042  | -   | 1061 | 0       | K.ILOYDTDDYLNLFVEYLGER.M                |

**No match to:** 865.45, 947.51, 1034.56, 1079.53, 1228.65, 1293.60, 1341.67, 1530.77, 1686.85, 1706.82, 1842.94, 1877.95, 1925.00, 2031.01, 2033.10, 2321.11, 2430.17, 2468.35, 2617.36, 2724.38, 2865.52, 2918.50, 3159.59, 3338.75

3. [gi|125978973](#) Mass: 59427 Score: 57 Expect: 0.098 Queries matched: 9

GA10863-PA [Drosophila pseudoobscura]

| Observed | Mr(expt) | Mr(calc) | ppm    | Start | End | Miss | Peptide |                                                          |
|----------|----------|----------|--------|-------|-----|------|---------|----------------------------------------------------------|
| 1341.67  | 1340.66  | 1340.61  | 33.1   | 210   | -   | 221  | 0       | K.CSASFSTNANLR.V + Propionamide (C)                      |
| 1925.00  | 1923.99  | 1923.89  | 55.3   | 210   | -   | 226  | 1       | K.CSASFSTNANLRVHMMR.H                                    |
| 2086.04  | 2085.03  | 2085.06  | -14.73 | 11    | -   | 31   | 0       | K.EDAVSLLTDSGISLSPPAAR.G                                 |
| 2321.11  | 2320.11  | 2320.11  | -1.42  | 284   | -   | 302  | 1       | K.HAAIKTHVCEVCNSYFTQK.S + 2 Propionamide (C)             |
| 2342.18  | 2341.18  | 2341.11  | 26.7   | 164   | -   | 182  | 1       | R.LHMRLLHSEKPYQPCIDK.R + Oxidation (M); Propionamide (C) |
| 2437.17  | 2436.16  | 2436.10  | 27.2   | 200   | -   | 221  | 1       | K.TCIQQFNCTKCSASFSTNANLR.V                               |
| 2724.38  | 2723.38  | 2723.28  | 34.0   | 187   | -   | 209  | 1       | R.GGQLQOHMVSHHKTCIQQFNCTK.C + Propionamide (C)           |
| 2918.50  | 2917.50  | 2917.45  | 15.3   | 11    | -   | 40   | 1       | K.EDAVSLLTDSGISLSPPAARGSSPTSSTK.L                        |
| 3338.75  | 3337.74  | 3337.62  | 37.0   | 402   | -   | 432  | 1       | K.CPAVEGDNTDSQSDALVLTIRFNMAVILK.K + Oxidation (M)        |

**No match to:** 865.45, 947.51, 1034.56, 1079.53, 1163.59, 1228.65, 1293.60, 1309.64, 1418.78, 1422.71, 1503.73, 1519.75, 1530.77, 1577.84, 1631.77, 1649.88, 1686.85, 1706.82, 1745.91, 1753.87, 1787.89, 1842.94, 1874.91, 1877.95, 1934.02, 2031.01, 2033.10, 2351.11, 2430.17, 2468.35, 2617.36, 2865.52, 3159.59

4. [gi|62472746](#) Mass: 56049 Score: 54 Expect: 0.17 Queries matched: 9

munin CG33518-PA [Drosophila melanogaster]

| Observed | Mr(expt) | Mr(calc) | ppm    | Start | End | Miss | Peptide |                                          |
|----------|----------|----------|--------|-------|-----|------|---------|------------------------------------------|
| 1034.56  | 1033.56  | 1033.49  | 62.1   | 301   | -   | 310  | 1       | K.KCAGRPSGCR.T                           |
| 1422.71  | 1421.70  | 1421.67  | 20.3   | 477   | -   | 489  | 0       | K.ADNMPHNIPGQTK.V                        |
| 1519.75  | 1518.74  | 1518.75  | -10.53 | 1     | -   | 12   | 1       | -.MLRICNYSHNIR.I                         |
| 1530.77  | 1529.76  | 1529.77  | -6.98  | 344   | -   | 356  | 0       | R.LLWMNPCVVEAQK.D                        |
| 1686.85  | 1685.85  | 1685.87  | -17.47 | 343   | -   | 356  | 1       | R.RLLWMNPCVVEAQK.D                       |
| 1787.89  | 1786.88  | 1786.84  | 24.1   | 203   | -   | 218  | 0       | K.GPHEDLNLDIAFLCK.K                      |
| 1877.95  | 1876.95  | 1876.84  | 57.6   | 188   | -   | 202  | 1       | R.CNRRACMSSLQAFYK.G + 2 Propionamide (C) |
| 1934.02  | 1933.02  | 1932.92  | 48.2   | 451   | -   | 467  | 0       | R.FVFCFPISTQSVQMGR.R + Oxidation (M)     |
| 2031.01  | 2030.00  | 2030.00  | 0.03   | 284   | -   | 300  | 1       | R.LKLEYEQAQAVDSVTK.K + Propionamide (C)  |

**No match to:** 865.45, 947.51, 1079.53, 1163.59, 1228.65, 1293.60, 1309.64, 1341.67, 1418.78, 1503.73, 1577.84, 1631.77, 1649.88, 1706.82, 1745.91, 1753.87, 1842.94, 1874.91, 1925.00, 2033.10, 2086.04, 2321.11, 2342.18, 2351.11, 2430.17, 2437.17, 2468.35, 2617.36, 2724.38, 2865.52, 2918.50, 3159.59, 3338.75

5. [gi|125986167](#) Mass: 26383 Score: 46 Expect: 1.1 Queries matched: 6

GA12955-PA [Drosophila pseudoobscura]

| Observed | Mr(expt) | Mr(calc) | ppm    | Start | End | Miss | Peptide |                                                |
|----------|----------|----------|--------|-------|-----|------|---------|------------------------------------------------|
| 1034.56  | 1033.56  | 1033.52  | 34.8   | 40    | -   | 48   | 1       | R.ADYPRDVAK.I                                  |
| 1530.77  | 1529.76  | 1529.82  | -35.90 | 120   | -   | 131  | 0       | R.FHCLFKPAQLQK.I + Propionamide (C)            |
| 1686.85  | 1685.85  | 1685.92  | -43.72 | 119   | -   | 131  | 1       | R.RFHCLFKPAQLQK.I + Propionamide (C)           |
| 1877.95  | 1876.95  | 1876.92  | 13.2   | 146   | -   | 162  | 0       | K.ASAMAAFLYQLYVMGNK.D                          |
| 1934.02  | 1933.02  | 1932.92  | 52.0   | 179   | -   | 195  | 1       | R.YKSGGQQRPEFGSYMAK.M                          |
| 2865.52  | 2864.51  | 2864.47  | 13.2   | 12    | -   | 37   | 1       | K.RMLSLIEGLNGTVDEQLSLAAFTWVK.L + Oxidation (M) |

**No match to:** 865.45, 947.51, 1079.53, 1163.59, 1228.65, 1293.60, 1309.64, 1341.67, 1418.78, 1422.71, 1503.73, 1519.75, 1577.84, 1631.77, 1649.88, 1706.82, 1745.91, 1753.87, 1787.89, 1842.94, 1874.91, 1925.00, 2031.01, 2033.10, 2086.04, 2321.11, 2342.18, 2351.11, 2430.17, 2437.17, 2468.35, 2617.36, 2724.38, 2918.50, 3159.59, 3338.75

6. [gi|125776225](#) Mass: 88474 Score: 45 Expect: 1.4 Queries matched: 9

GA20047-PA [Drosophila pseudoobscura]

| Observed | Mr(expt) | Mr(calc) | ppm    | Start | End | Miss | Peptide |                                         |
|----------|----------|----------|--------|-------|-----|------|---------|-----------------------------------------|
| 865.45   | 864.44   | 864.42   | 21.9   | 274   | -   | 279  | 1       | K.DYRQQR.R                              |
| 1079.53  | 1078.52  | 1078.57  | -43.38 | 616   | -   | 625  | 0       | K.LPHIAQAACR.R                          |
| 1309.64  | 1308.63  | 1308.71  | -59.90 | 363   | -   | 373  | 0       | K.NLIMLSINTFK.C + Oxidation (M)         |
| 1530.77  | 1529.76  | 1529.86  | -66.15 | 164   | -   | 176  | 0       | R.FATQMQIQIPIIK.E                       |
| 1649.88  | 1648.87  | 1648.82  | 31.4   | 74    | -   | 87   | 0       | K.QLHDEVHSLDTSR.Q                       |
| 1787.89  | 1786.88  | 1786.87  | 7.49   | 432   | -   | 446  | 0       | R.FPFHSEQLENAPFPK.K                     |
| 2351.11  | 2350.11  | 2350.19  | -36.85 | 138   | -   | 156  | 1       | K.QYYQALRTLETLETEHLR.L                  |
| 2437.17  | 2436.16  | 2436.21  | -18.94 | 281   | -   | 301  | 1       | R.DQAKLVLPNPMHDNLEAYK.T + Oxidation (M) |
| 2468.35  | 2467.34  | 2467.19  | 60.1   | 412   | -   | 431  | 0       | K.EQFLPMVVQNVVEYESIIR.F + Oxidation (M) |

**No match to:** 947.51, 1034.56, 1163.59, 1228.65, 1293.60, 1341.67, 1418.78, 1422.71, 1503.73, 1519.75, 1577.84, 1631.77, 1686.85, 1706.82, 1745.91, 1753.87, 1842.94, 1874.91, 1877.95, 1925.00, 1934.02, 2031.01, 2033.10, 2086.04, 2321.11, 2342.18, 2430.17, 2617.36, 2724.38, 2865.52, 2918.50, 3159.59, 3338.75

7. [gi|21357939](#) Mass: 34785 Score: 45 Expect: 1.5 Queries matched: 8

CG16984-PA [Drosophila melanogaster]

| Observed | Mr(expt) | Mr(calc) | ppm   | Start | End | Miss | Peptide |                                                         |
|----------|----------|----------|-------|-------|-----|------|---------|---------------------------------------------------------|
| 947.51   | 946.50   | 946.51   | -8.70 | 280   | -   | 287  | 1       | K.SKLESDLR.Q                                            |
| 1530.77  | 1529.76  | 1529.70  | 43.2  | 224   | -   | 238  | 0       | R.ASVQSSGPPMPGMR.V + 2 Oxidation (M)                    |
| 1577.84  | 1576.83  | 1576.79  | 27.0  | 143   | -   | 156  | 0       | K.ICAGQTVPCPPPPR.Y + 2 Propionamide (C)                 |
| 1753.87  | 1752.87  | 1752.80  | 40.4  | 196   | -   | 210  | 1       | R.MLADMNVAKEQAR.L + 2 Oxidation (M); Propionamide (C)   |
| 1787.89  | 1786.88  | 1786.89  | -6.71 | 112   | -   | 129  | 1       | K.CPKMPPMPLPPPGSGGK.K                                   |
| 1874.91  | 1873.91  | 1873.93  | -9.59 | 112   | -   | 129  | 1       | K.CPKMPPMPLPPPGSGGK.K + Oxidation (M); Propionamide (C) |
| 2342.18  | 2341.18  | 2341.10  | 33.2  | 224   | -   | 245  | 1       | R.ASVQSSGPPMPGMRVMEQAER.N                               |
| 2617.36  | 2616.35  | 2616.36  | -4.71 | 115   | -   | 139  | 1       | K.MPPMPLPPPGSGGK.PAMVNFIR.K + 2 Oxidation (M)           |

**No match to:** 865.45, 1034.56, 1079.53, 1163.59, 1228.65, 1293.60, 1309.64, 1341.67, 1418.78, 1422.71, 1503.73, 1519.75, 1631.77, 1649.88, 1686.85, 1706.82, 1745.91, 1753.87, 1842.94, 1874.91, 1877.95, 1925.00, 1934.02, 2031.01, 2033.10, 2086.04, 2321.11, 2351.11, 2430.17, 2437.17, 2468.35, 2724.38, 2865.52, 2918.50, 3159.59, 3338.75

8. [gi|45552865](#) Mass: 455345 Score: 45 Expect: 1.6 Queries matched: 21

Dynein heavy chain at 62B CG15804-PB, isoform B [Drosophila melanogaster]

| Observed | Mr(expt) | Mr(calc) | ppm    | Start | End | Miss | Peptide |                                                                     |
|----------|----------|----------|--------|-------|-----|------|---------|---------------------------------------------------------------------|
| 947.51   | 946.50   | 946.53   | -28.43 | 2122  | -   | 2130 | 0       | R.VVTGCTLVR.K                                                       |
| 1079.53  | 1078.52  | 1078.47  | 51.0   | 691   | -   | 697  | 0       | K.CCIEWQR.Y + 2 Propionamide (C)                                    |
| 1163.59  | 1162.58  | 1162.63  | -44.41 | 3128  | -   | 3137 | 1       | K.ETVAKIEAFR.L                                                      |
| 1228.65  | 1227.64  | 1227.68  | -33.54 | 1883  | -   | 1894 | 0       | K.TGVIVPTDTR.Y                                                      |
| 1418.78  | 1417.77  | 1417.77  | -1.63  | 2118  | -   | 2130 | 1       | R.DISRVVTGCTLVR.K                                                   |
| 1503.73  | 1502.73  | 1502.83  | -68.46 | 2679  | -   | 2691 | 1       | K.RLLGEMNPLPLK.E + Oxidation (M)                                    |
| 1519.75  | 1518.74  | 1518.77  | -21.79 | 598   | -   | 609  | 0       | K.FTFEHLQEVK.K                                                      |
| 1631.77  | 1630.76  | 1630.80  | -24.92 | 402   | -   | 414  | 0       | R.TYQEVQYVEGFR.D                                                    |
| 1686.85  | 1685.85  | 1685.85  | -1.25  | 2586  | -   | 2601 | 0       | R.DEEVASVQEAQAQVLK.Q                                                |
| 1787.89  | 1786.88  | 1786.82  | 31.5   | 2143  | -   | 2155 | 1       | R.VVYHEAMRVFYDR.L + Oxidation (M)                                   |
| 1842.94  | 1841.93  | 1841.95  | -10.59 | 2585  | -   | 2601 | 1       | K.RDEEVASVQEAQAQVLK.Q                                               |
| 1874.91  | 1873.91  | 1873.92  | -7.33  | 402   | -   | 416  | 1       | R.TYQEVQYVEGFRD.Y                                                   |
| 2031.01  | 2030.00  | 2029.97  | 18.0   | 2755  | -   | 2772 | 1       | K.LAGAEKEYADTMEFLAQK.R + Oxidation (M)                              |
| 2086.04  | 2085.03  | 2085.00  | 12.4   | 777   | -   | 794  | 0       | K.DFTTGVFIVNTMCPALR.K + Oxidation (M); Propionamide (C)             |
| 2342.18  | 2341.18  | 2341.07  | 47.1   | 427   | -   | 445  | 0       | R.DALNQFLSEPHFEYFAR.I                                               |
| 2351.11  | 2350.11  | 2350.09  | 4.36   | 680   | -   | 697  | 1       | K.TFYVYFAELMCCIEWQR.Y + Oxidation (M); Propionamide (C)             |
| 2468.35  | 2467.34  | 2467.32  | 8.08   | 395   | -   | 414  | 1       | K.VQNIILRTYQEVQYVEGFR.D                                             |
| 2617.36  | 2616.35  | 2616.46  | -40.26 | 3036  | -   | 3059 | 0       | K.VTVINFALTQNALMDQLLSIVVAK.E + Oxidation (M)                        |
| 2918.50  | 2917.50  | 2917.43  | 22.0   | 1640  | -   | 1664 | 1       | K.WVIFDGPVDAVNIENMNTVLDDNKK.L                                       |
| 3159.59  | 3158.58  | 3158.60  | -6.94  | 3084  | -   | 3113 | 1       | R.DAENMILKTLASAGDILENAAIQILADSK.G + Oxidation (M)                   |
| 3338.75  | 3337.74  | 3337.61  | 39.5   | 1726  | -   | 1752 | 1       | R.WADEGVPYVMMALMQWLLPCCQTFVRR.F + 2 Oxidation (M); Propionamide (C) |

**No match to:** 865.45, 1034.56, 1293.60, 1309.64, 1341.67, 1422.71, 1530.77, 1577.84, 1649.88, 1706.82, 1745.91, 1753.87, 1877.95, 1925.00, 1934.02, 2033.10, 2321.11, 2430.17, 2437.17, 2724.38, 2865.52

9. [gi|6118254](#) Mass: 68888 Score: 45 Expect: 1.6 Queries matched: 9

DEAD-box protein abstrakt [Drosophila melanogaster]

| Observed | Mr(expt) | Mr(calc) | ppm    | Start | End | Miss | Peptide |                                                   |
|----------|----------|----------|--------|-------|-----|------|---------|---------------------------------------------------|
| 865.45   | 864.44   | 864.41   | 35.4   | 315   | -   | 321  | 0       | R.LMDMLDK.K                                       |
| 1163.59  | 1162.58  | 1162.62  | -32.04 | 322   | -   | 330  | 1       | K.KILTLMCR.Y + Propionamide (C)                   |
| 1341.67  | 1340.66  | 1340.63  | 19.3   | 274   | -   | 284  | 0       | K.HLQACGMPDIR.S + Oxidation (M); Propionamide (C) |

|         |         |         |        |     |   |     |   |                                         |
|---------|---------|---------|--------|-----|---|-----|---|-----------------------------------------|
| 1418.78 | 1417.77 | 1417.70 | 46.9   | 246 | - | 258 | 0 | R.NEGPYGLIICPSR.E                       |
| 1577.84 | 1576.83 | 1576.84 | -7.33  | 358 | - | 371 | 1 | K.QQRQTLLFSATMPK.K                      |
| 1649.88 | 1648.87 | 1648.89 | -10.41 | 408 | - | 421 | 1 | K.QEAKVVYLLDCLQK.T                      |
| 1787.89 | 1786.88 | 1786.93 | -26.57 | 433 | - | 446 | 1 | K.QQDVDCIHEYLLLK.G + Propionamide (C)   |
| 1934.02 | 1933.02 | 1932.96 | 26.3   | 285 | - | 303 | 0 | R.SCLAMGGLPVSEALDVISR.G + Oxidation (M) |
| 2031.01 | 2030.00 | 2030.09 | -43.00 | 107 | - | 125 | 1 | K.IMESIAQQKALMGVAELAK.G                 |

**No match to:** 947.51, 1034.56, 1079.53, 1228.65, 1293.60, 1309.64, 1422.71, 1503.73, 1519.75, 1530.77, 1631.77, 1686.85, 1706.82, 1745.91, 1753.87, 1842.94, 1874.91, 1877.95, 1925.00, 2033.10, 2086.04, 2321.11, 2342.18, 2351.11, 2430.17, 2437.17, 2468.35, 2617.36, 2724.38, 2865.52, 2918.50, 3159.59, 3338.75

10. [gi|17977678](#) Mass: 69444 Score: 45 Expect: 1.6 Queries matched: 9

abstrakt CG14637-PA [Drosophila melanogaster]

| Observed | Mr(expt) | Mr(calc) | ppm    | Start | End | Miss | Peptide |                                                   |
|----------|----------|----------|--------|-------|-----|------|---------|---------------------------------------------------|
| 865.45   | 864.44   | 864.41   | 35.4   | 320   | -   | 326  | 0       | R.LMDMLDK.K                                       |
| 1163.59  | 1162.58  | 1162.62  | -32.04 | 327   | -   | 335  | 1       | K.KILTLDMCR.Y + Propionamide (C)                  |
| 1341.67  | 1340.66  | 1340.63  | 19.3   | 279   | -   | 289  | 0       | K.HLQACGMPEIR.S + Oxidation (M); Propionamide (C) |
| 1418.78  | 1417.77  | 1417.70  | 46.9   | 251   | -   | 263  | 0       | R.NEGPYGLIICPSR.E                                 |
| 1577.84  | 1576.83  | 1576.84  | -7.33  | 363   | -   | 376  | 1       | K.QQRQTLLFSATMPK.K                                |
| 1649.88  | 1648.87  | 1648.89  | -10.41 | 413   | -   | 426  | 1       | K.QEAKVVYLLDCLQK.T                                |
| 1787.89  | 1786.88  | 1786.93  | -26.57 | 438   | -   | 451  | 1       | K.QQDVDCIHEYLLLK.G + Propionamide (C)             |
| 1934.02  | 1933.02  | 1932.96  | 26.3   | 290   | -   | 308  | 0       | R.SCLAMGGLPVSEALDVISR.G + Oxidation (M)           |
| 2031.01  | 2030.00  | 2030.09  | -43.00 | 112   | -   | 130  | 1       | K.IMESIAQQKALMGVAELAK.G                           |

**No match to:** 947.51, 1034.56, 1079.53, 1228.65, 1293.60, 1309.64, 1422.71, 1503.73, 1519.75, 1530.77, 1631.77, 1686.85, 1706.82, 1745.91, 1753.87, 1842.94, 1874.91, 1877.95, 1925.00, 2033.10, 2086.04, 2321.11, 2342.18, 2351.11, 2430.17, 2437.17, 2468.35, 2617.36, 2724.38, 2865.52, 2918.50, 3159.59, 3338.75

11. [gi|125777504](#) Mass: 69135 Score: 44 Expect: 1.8 Queries matched: 9

GA13135-PA [Drosophila pseudoobscura]

| Observed | Mr(expt) | Mr(calc) | ppm    | Start | End | Miss | Peptide |                                         |
|----------|----------|----------|--------|-------|-----|------|---------|-----------------------------------------|
| 865.45   | 864.44   | 864.41   | 35.4   | 320   | -   | 326  | 0       | R.LMDMLDK.K                             |
| 1163.59  | 1162.58  | 1162.62  | -32.04 | 327   | -   | 335  | 1       | K.KILTLDMCR.Y + Propionamide (C)        |
| 1341.67  | 1340.66  | 1340.57  | 63.1   | 345   | -   | 355  | 0       | R.MIDMGFEEDVR.T                         |
| 1418.78  | 1417.77  | 1417.70  | 46.9   | 251   | -   | 263  | 0       | R.NEGPYGLIICPSR.E                       |
| 1577.84  | 1576.83  | 1576.84  | -7.33  | 363   | -   | 376  | 1       | K.QQRQTLLFSATMPK.K                      |
| 1649.88  | 1648.87  | 1648.89  | -10.41 | 413   | -   | 426  | 1       | K.QEAKVVYLLDCLQK.T                      |
| 1787.89  | 1786.88  | 1786.93  | -26.57 | 438   | -   | 451  | 1       | K.QQDVDCIHEYLLLK.G + Propionamide (C)   |
| 1934.02  | 1933.02  | 1932.96  | 26.3   | 290   | -   | 308  | 0       | R.SCLAMGGLPVSEALDVISR.G + Oxidation (M) |
| 2031.01  | 2030.00  | 2030.09  | -43.00 | 112   | -   | 130  | 1       | K.IMESIAQQKALMGVAELAK.G                 |

**No match to:** 947.51, 1034.56, 1079.53, 1228.65, 1293.60, 1309.64, 1422.71, 1503.73, 1519.75, 1530.77, 1631.77, 1686.85, 1706.82, 1745.91, 1753.87, 1842.94, 1874.91, 1877.95, 1925.00, 2033.10, 2086.04, 2321.11, 2342.18, 2351.11, 2430.17, 2437.17, 2468.35, 2617.36, 2724.38, 2865.52, 2918.50, 3159.59, 3338.75

12. [gi|17136796](#) Mass: 54515 Score: 42 Expect: 2.9 Queries matched: 8

Vacuolar H[+]-ATPase 55kD B subunit CG17369-PB, isoform B [Drosophila melanogaster]

| Observed | Mr(expt) | Mr(calc) | ppm    | Start | End | Miss | Peptide |                                      |
|----------|----------|----------|--------|-------|-----|------|---------|--------------------------------------|
| 1293.60  | 1292.60  | 1292.66  | -48.76 | 381   | -   | 392  | 1       | R.LMKSAIGEGMTR.K                     |
| 1309.64  | 1308.63  | 1308.65  | -15.45 | 381   | -   | 392  | 1       | R.LMKSAIGEGMTR.K + Oxidation (M)     |
| 1341.67  | 1340.66  | 1340.61  | 35.7   | 441   | -   | 451  | 0       | K.NFISQGNENR.T                       |
| 1706.82  | 1705.81  | 1705.90  | -50.61 | 2     | -   | 16   | 1       | M.NAQQAQREHVLAVSR.D                  |
| 1745.91  | 1744.90  | 1744.82  | 46.9   | 438   | -   | 451  | 1       | K.FEKNFISQGNENR.T                    |
| 1753.87  | 1752.87  | 1752.93  | -34.63 | 9     | -   | 23   | 1       | R.EHVLAVSRDFISQPR.L                  |
| 1934.02  | 1933.02  | 1933.00  | 9.24   | 272   | -   | 288  | 0       | K.HVLVILTMSSYAEALR.E + Oxidation (M) |
| 2724.38  | 2723.38  | 2723.27  | 39.9   | 198   | -   | 222  | 0       | K.SVLDDHTDNFAIVFAAMGVNMETAR.F        |

**No match to:** 865.45, 947.51, 1034.56, 1079.53, 1163.59, 1228.65, 1418.78, 1422.71, 1503.73, 1519.75, 1530.77, 1577.84, 1631.77, 1649.88, 1686.85, 1787.89, 1842.94, 1874.91, 1877.95, 1925.00, 2031.01, 2033.10, 2086.04, 2321.11, 2342.18, 2351.11, 2430.17, 2437.17, 2468.35, 2617.36, 2865.52, 2918.50, 3159.59, 3338.75

13. [gi|45550626](#) Mass: 95197 Score: 41 Expect: 3.5 Queries matched: 9

CG6114-PA [Drosophila melanogaster]

| Observed | Mr(expt) | Mr(calc) | ppm    | Start | End | Miss | Peptide |                                            |
|----------|----------|----------|--------|-------|-----|------|---------|--------------------------------------------|
| 1034.56  | 1033.56  | 1033.54  | 14.3   | 415   | -   | 424  | 0       | R.SPTTIVTSSVR.S                            |
| 1163.59  | 1162.58  | 1162.63  | -37.64 | 52    | -   | 61   | 1       | R.EKLSSESVLMK.V                            |
| 1341.67  | 1340.66  | 1340.67  | -7.24  | 357   | -   | 368  | 1       | K.SRSELDAVDPPR.K                           |
| 1530.77  | 1529.76  | 1529.74  | 12.1   | 741   | -   | 753  | 1       | R.ICEHIQSQCYSKR.F                          |
| 1925.00  | 1923.99  | 1924.00  | -4.38  | 478   | -   | 495  | 1       | R.TPSHSSQKSIEGDVVVVR.E                     |
| 2342.18  | 2341.18  | 2341.15  | 12.1   | 614   | -   | 634  | 1       | R.KMQVSADEVHLTPESSEPELTK.R + Oxidation (M) |
| 2468.35  | 2467.34  | 2467.29  | 21.5   | 716   | -   | 737  | 1       | K.QGDIADMLFALTFTLLSGNIRR.F + Oxidation (M) |
| 2617.36  | 2616.35  | 2616.21  | 52.5   | 434   | -   | 459  | 0       | R.CNSPMSSAQQANAI SRPSSPAAGTR.H             |
| 3338.75  | 3337.74  | 3337.52  | 64.8   | 156   | -   | 187  | 0       | K.IADFGMASLQAGSMLETSCGSPHYACPEVIR.G        |

**No match to:** 865.45, 947.51, 1079.53, 1228.65, 1293.60, 1309.64, 1418.78, 1422.71, 1503.73, 1519.75, 1577.84, 1631.77, 1649.88, 1686.85, 1706.82, 1745.91, 1753.87, 1787.89, 1842.94, 1874.91, 1877.95, 1925.00, 2031.01, 2033.10, 2086.04, 2321.11, 2351.11, 2430.17, 2437.17, 2724.38, 2865.52, 2918.50, 3159.59

14. [gi|125807930](#) Mass: 89695 Score: 41 Expect: 4.1 Queries matched: 9

GA19661-PA [Drosophila pseudoobscura]

| Observed | Mr(expt) | Mr(calc) | ppm | Start | End | Miss | Peptide |
|----------|----------|----------|-----|-------|-----|------|---------|
|----------|----------|----------|-----|-------|-----|------|---------|



|         |         |         |        |     |   |     |   |                                          |
|---------|---------|---------|--------|-----|---|-----|---|------------------------------------------|
| 1034.56 | 1033.56 | 1033.56 | -0.46  | 172 | - | 179 | 0 | R.LQLQQYVQK.L                            |
| 1079.53 | 1078.52 | 1078.60 | -66.72 | 788 | - | 797 | 1 | K.SLIGGRFCVK.Q                           |
| 1341.67 | 1340.66 | 1340.65 | 8.87   | 690 | - | 700 | 1 | R.CKACDELIFTK.E + Propionamide (C)       |
| 1530.77 | 1529.76 | 1529.66 | 67.0   | 32  | - | 46  | 0 | K.LGHESGAGAPCTECK.D + Propionamide (C)   |
| 1745.91 | 1744.90 | 1744.79 | 63.9   | 30  | - | 46  | 1 | R.SKLGHESGAGAPCTECK.D + Propionamide (C) |
| 1787.89 | 1786.88 | 1786.79 | 53.6   | 646 | - | 660 | 1 | K.EIAWHPGCFKCHTCR.E                      |
| 1842.94 | 1841.93 | 1841.86 | 35.9   | 794 | - | 809 | 1 | R.FCVKQDLDFCSPTCVR.S                     |
| 2617.36 | 2616.35 | 2616.34 | 3.77   | 193 | - | 216 | 1 | R.VGNRLTHGYVEHVTPPIQSEAANK.T             |
| 3159.59 | 3158.58 | 3158.43 | 46.3   | 581 | - | 607 | 0 | K.FTTIPGIEDMNMYPNCVGMPEQFQQLR.L          |

**No match to:** 865.45, 947.51, 1163.59, 1228.65, 1293.60, 1309.64, 1418.78, 1422.71, 1503.73, 1519.75, 1577.84, 1631.77, 1649.88, 1686.85, 1706.82, 1753.87, 1842.94, 1874.91, 1877.95, 1925.00, 2031.01, 2033.10, 2086.04, 2321.11, 2342.18, 2351.11, 2430.17, 2437.17, 2468.35, 2724.38, 2865.52, 2918.50, 3338.75

15. [gi|24585660](#) Mass: 100234 Score: 40 Expect: 4.8 Queries matched: 10

CG8665-PA [Drosophila melanogaster]

| Observed | Mr(expt) | Mr(calc) | ppm    | Start | End | Miss | Peptide |                                                             |
|----------|----------|----------|--------|-------|-----|------|---------|-------------------------------------------------------------|
| 1079.53  | 1078.52  | 1078.50  | 25.3   | 464   | -   | 474  | 0       | K.VACASATDVDK.A                                             |
| 1503.73  | 1502.73  | 1502.76  | -22.28 | 496   | -   | 508  | 0       | R.GQLMLNLADLMER.N                                           |
| 1519.75  | 1518.74  | 1518.75  | -9.66  | 496   | -   | 508  | 0       | R.GQLMLNLADLMER.N + Oxidation (M)                           |
| 1530.77  | 1529.76  | 1529.85  | -54.00 | 27    | -   | 40   | 0       | R.SNIQIVGVFTIPDK.G                                          |
| 1649.88  | 1648.87  | 1648.80  | 42.2   | 714   | -   | 728  | 1       | K.GENCIAAGRLFVEDR.I                                         |
| 1745.91  | 1744.90  | 1744.90  | 1.37   | 496   | -   | 510  | 1       | R.GQLMLNLADLMERNK.E                                         |
| 1787.89  | 1786.88  | 1786.92  | -20.66 | 494   | -   | 508  | 1       | R.QRQQLMLNLADLMER.N                                         |
| 2342.18  | 2341.18  | 2341.10  | 32.1   | 680   | -   | 700  | 1       | K.CSLELGGKSPLIIFADCDMDK.A + Oxidation (M); Propionamide (C) |
| 2351.11  | 2350.11  | 2350.23  | -51.76 | 509   | -   | 530  | 1       | R.NKEELATIESVDSGAVYTLALK.T                                  |
| 2617.36  | 2616.35  | 2616.35  | -0.59  | 44    | -   | 65   | 1       | R.EDILATTATIHNIPVFKFACWR.R + Propionamide (C)               |

**No match to:** 865.45, 947.51, 1034.56, 1163.59, 1228.65, 1293.60, 1309.64, 1341.67, 1418.78, 1422.71, 1577.84, 1631.77, 1686.85, 1706.82, 1753.87, 1842.94, 1874.91, 1877.95, 1925.00, 1934.02, 2031.01, 2033.10, 2086.04, 2321.11, 2430.17, 2437.17, 2468.35, 2724.38, 2865.52, 2918.50, 3159.59, 3338.75

16. [gi|125987453](#) Mass: 136258 Score: 39 Expect: 5.5 Queries matched: 10

GA12952-PA [Drosophila pseudoobscura]

| Observed | Mr(expt) | Mr(calc) | ppm    | Start | End | Miss | Peptide |                                        |
|----------|----------|----------|--------|-------|-----|------|---------|----------------------------------------|
| 865.45   | 864.44   | 864.40   | 44.0   | 710   | -   | 717  | 0       | K.QSMTSPSSK.Q                          |
| 1163.59  | 1162.58  | 1162.60  | -16.02 | 707   | -   | 717  | 1       | R.LGKQSMTPSSK.Q                        |
| 1530.77  | 1529.76  | 1529.84  | -49.71 | 881   | -   | 893  | 1       | K.GMAYLTEKLVHR.D                       |
| 1686.85  | 1685.85  | 1685.95  | -60.12 | 141   | -   | 156  | 1       | R.TFEPVLIGALNSRAAK.Y                   |
| 1753.87  | 1752.87  | 1752.86  | 5.37   | 13    | -   | 27   | 0       | K.FNLPINEESESIFSK.I                    |
| 1787.89  | 1786.88  | 1786.83  | 26.3   | 512   | -   | 526  | 1       | R.SQTCAQIKYQSQCTK.F + Propionamide (C) |
| 1877.95  | 1876.95  | 1876.89  | 31.2   | 852   | -   | 869  | 0       | K.IECAGVDFSDGVEPVNVK.M                 |
| 2321.11  | 2320.11  | 2320.02  | 37.6   | 520   | -   | 540  | 1       | K.YQSQCTKFCGLATNGGPCTWR.G              |
| 2342.18  | 2341.18  | 2341.17  | 1.95   | 186   | -   | 206  | 1       | R.HPLDDELNGLMARAGQLQAR.I               |
| 2724.38  | 2723.38  | 2723.43  | -20.06 | 819   | -   | 843  | 1       | K.LLGACTQSSEAPLLIIEYARYGSLR.S          |

**No match to:** 947.51, 1034.56, 1079.53, 1228.65, 1293.60, 1309.64, 1341.67, 1418.78, 1422.71, 1503.73, 1519.75, 1577.84, 1631.77, 1649.88, 1706.82, 1745.91, 1842.94, 1874.91, 1925.00, 1934.02, 2031.01, 2033.10, 2086.04, 2351.11, 2430.17, 2437.17, 2468.35, 2617.36, 2865.52, 2918.50, 3159.59, 3338.75

17. [gi|66773024](#) Mass: 42756 Score: 39 Expect: 5.5 Queries matched: 6

IP10422p [Drosophila melanogaster]

| Observed | Mr(expt) | Mr(calc) | ppm    | Start | End | Miss | Peptide |                                                 |
|----------|----------|----------|--------|-------|-----|------|---------|-------------------------------------------------|
| 1079.53  | 1078.52  | 1078.55  | -26.12 | 86    | -   | 94   | 0       | R.ISISHTEHR.I                                   |
| 1530.77  | 1529.76  | 1529.72  | 27.3   | 171   | -   | 184  | 0       | R.EEATPILISDDGDR.E                              |
| 1686.85  | 1685.85  | 1685.82  | 13.7   | 170   | -   | 184  | 1       | R.EEATPILISDDGDR.E                              |
| 2033.10  | 2032.09  | 2032.04  | 26.9   | 185   | -   | 201  | 0       | R.EVFSVEGQNLTLWQVQR.S                           |
| 2437.17  | 2436.16  | 2436.18  | -5.42  | 147   | -   | 169  | 0       | R.STGQNVTLTCSATGVPMTITWR.R + Oxidation (M)      |
| 2617.36  | 2616.35  | 2616.33  | 7.66   | 356   | -   | 376  | 1       | K.SCSFQPLWIMFLCFVNVKVSLL.- + 2 Propionamide (C) |

**No match to:** 865.45, 947.51, 1034.56, 1163.59, 1228.65, 1293.60, 1309.64, 1341.67, 1418.78, 1422.71, 1503.73, 1519.75, 1577.84, 1631.77, 1649.88, 1706.82, 1745.91, 1753.87, 1787.89, 1842.94, 1874.91, 1877.95, 1925.00, 1934.02, 2031.01, 2086.04, 2321.11, 2342.18, 2351.11, 2430.17, 2468.35, 2724.38, 2865.52, 2918.50, 3159.59, 3338.75

18. [gi|24639719](#) Mass: 93167 Score: 39 Expect: 5.9 Queries matched: 10

cap binding protein 80 CG7035-PA, isoform A [Drosophila melanogaster]

| Observed | Mr(expt) | Mr(calc) | ppm    | Start | End | Miss | Peptide |                                           |
|----------|----------|----------|--------|-------|-----|------|---------|-------------------------------------------|
| 947.51   | 946.50   | 946.49   | 10.0   | 74    | -   | 81   | 0       | R.I LSDCAVR.M + Propionamide (C)          |
| 1034.56  | 1033.56  | 1033.59  | -35.64 | 202   | -   | 209  | 1       | R.IEVYLNKR.S                              |
| 1079.53  | 1078.52  | 1078.48  | 40.6   | 121   | -   | 128  | 1       | K.MCRWDAAR.Y + Propionamide (C)           |
| 1503.73  | 1502.73  | 1502.74  | -9.87  | 705   | -   | 717  | 1       | R.MEEKLEAANVNQK.R                         |
| 1519.75  | 1518.74  | 1518.73  | 2.62   | 705   | -   | 717  | 1       | R.MEEKLEAANVNQK.R + Oxidation (M)         |
| 1686.85  | 1685.85  | 1685.79  | 34.3   | 100   | -   | 113  | 1       | K.NYKFGGEFVDHMVK.T + Oxidation (M)        |
| 1745.91  | 1744.90  | 1744.88  | 11.9   | 370   | -   | 384  | 0       | R.YLDICYGSILIELCK.L                       |
| 2086.04  | 2085.03  | 2085.00  | 12.4   | 462   | -   | 478  | 1       | R.LSYHQRITEMPPTYAK.L + Oxidation (M)      |
| 2351.11  | 2350.11  | 2350.00  | 45.0   | 294   | -   | 314  | 0       | R.MFDYDTCPDGPNLPGAHSIER.F + Oxidation (M) |
| 2437.17  | 2436.16  | 2436.28  | -45.78 | 490   | -   | 512  | 0       | K.YANEEAANLPGTTVAHQLVVAIR.Q               |

**No match to:** 865.45, 1163.59, 1228.65, 1293.60, 1309.64, 1341.67, 1418.78, 1422.71, 1530.77, 1577.84, 1631.77, 1649.88, 1706.82, 1753.87, 1787.89, 1842.94, 1874.91, 1877.95, 1925.00, 1934.02, 2031.01, 2033.10, 2321.11, 2342.18, 2430.17, 2468.35, 2617.36, 2724.38, 2865.52, 2918.50, 3159.59, 3338.75

19. [gi|19920610](#) Mass: 39966 Score: 39 Expect: 6.5 Queries matched: 6

CG3165-PA [Drosophila melanogaster]

| Observed | Mr(expt) | Mr(calc) | ppm    | Start | End   | Miss | Peptide                                   |
|----------|----------|----------|--------|-------|-------|------|-------------------------------------------|
| 947.51   | 946.50   | 946.50   | 1.75   | 256   | - 262 | 1    | K.RKPDEFER.S                              |
| 1034.56  | 1033.56  | 1033.53  | 23.9   | 257   | - 264 | 1    | R.KPDEFERSR.R                             |
| 1341.67  | 1340.66  | 1340.59  | 49.9   | 166   | - 176 | 0    | R.AFMEIDDTQOK.E + Oxidation (M)           |
| 1753.87  | 1752.87  | 1752.79  | 42.8   | 59    | - 73  | 0    | K.EQDQDEQQELPAAPR.V                       |
| 1877.95  | 1876.95  | 1876.98  | -17.01 | 106   | - 122 | 0    | R.ESQLDTDAAQLIVSFLK.H                     |
| 2437.17  | 2436.16  | 2436.28  | -48.82 | 74    | - 94  | 1    | R.VLHKLNVLFQPSMVVDPEAER.I + Oxidation (M) |

No match to: 865.45, 1079.53, 1163.59, 1228.65, 1293.60, 1309.64, 1418.78, 1422.71, 1503.73, 1519.75, 1530.77, 1577.84, 1631.77, 1649.88, 1686.85, 1706.82, 1745.91, 1787.89, 1842.94, 1874.91, 1925.00, 1934.02, 2031.01, 2033.10, 2086.04, 2321.11, 2342.18, 2351.11, 2430.17, 2468.35, 2617.36, 2724.38, 2865.52, 2918.50, 3159.59, 3338.75

20. [gi|19921938](#) Mass: 23839 Score: 39 Expect: 6.6 Queries matched: 5

CG1648-PA, isoform A [Drosophila melanogaster]

| Observed | Mr(expt) | Mr(calc) | ppm    | Start | End   | Miss | Peptide                   |
|----------|----------|----------|--------|-------|-------|------|---------------------------|
| 1034.56  | 1033.56  | 1033.50  | 49.5   | 176   | - 184 | 0    | K.QTSQTVDDQK.L            |
| 1341.67  | 1340.66  | 1340.67  | -10.25 | 11    | - 22  | 1    | K.NFGDKTANLFSK.K          |
| 1631.77  | 1630.76  | 1630.80  | -26.98 | 1     | - 15  | 1    | -.MFSSISASLKNFGDK.T       |
| 1925.00  | 1923.99  | 1923.99  | 2.86   | 82    | - 101 | 1    | K.AGQAIDQGVNRAAGAVNQGK.Q  |
| 2351.11  | 2350.11  | 2350.14  | -14.89 | 176   | - 195 | 1    | K.QTSQTVDDQKLQEANQYVDQK.R |

No match to: 865.45, 947.51, 1079.53, 1163.59, 1228.65, 1293.60, 1309.64, 1418.78, 1422.71, 1503.73, 1519.75, 1530.77, 1577.84, 1649.88, 1686.85, 1706.82, 1745.91, 1753.87, 1787.89, 1842.94, 1874.91, 1877.95, 1934.02, 2031.01, 2033.10, 2086.04, 2321.11, 2342.18, 2430.17, 2437.17, 2468.35, 2617.36, 2724.38, 2865.52, 2918.50, 3159.59, 3338.75

## Search Parameters

Type of search : Peptide Mass Fingerprint  
 Enzyme : Trypsin  
 Variable modifications : Oxidation (M), Propionamide (C)  
 Mass values : Monoisotopic  
 Protein Mass : Unrestricted  
 Peptide Mass Tolerance :  $\pm 70$  ppm  
 Peptide Charge State : 1+  
 Max Missed Cleavages : 1  
 Number of queries : 42

Mascot: <http://www.matrixscience.com/>
